# Supplementary figures and images for: Bioderived silicon nano-quills: synthesis, structure and performance in lithium-ion battery anodes
Source: Royal Society of Chemistry journal article supplement (doi:10.1039/d4gc00498a), 2024-01-01

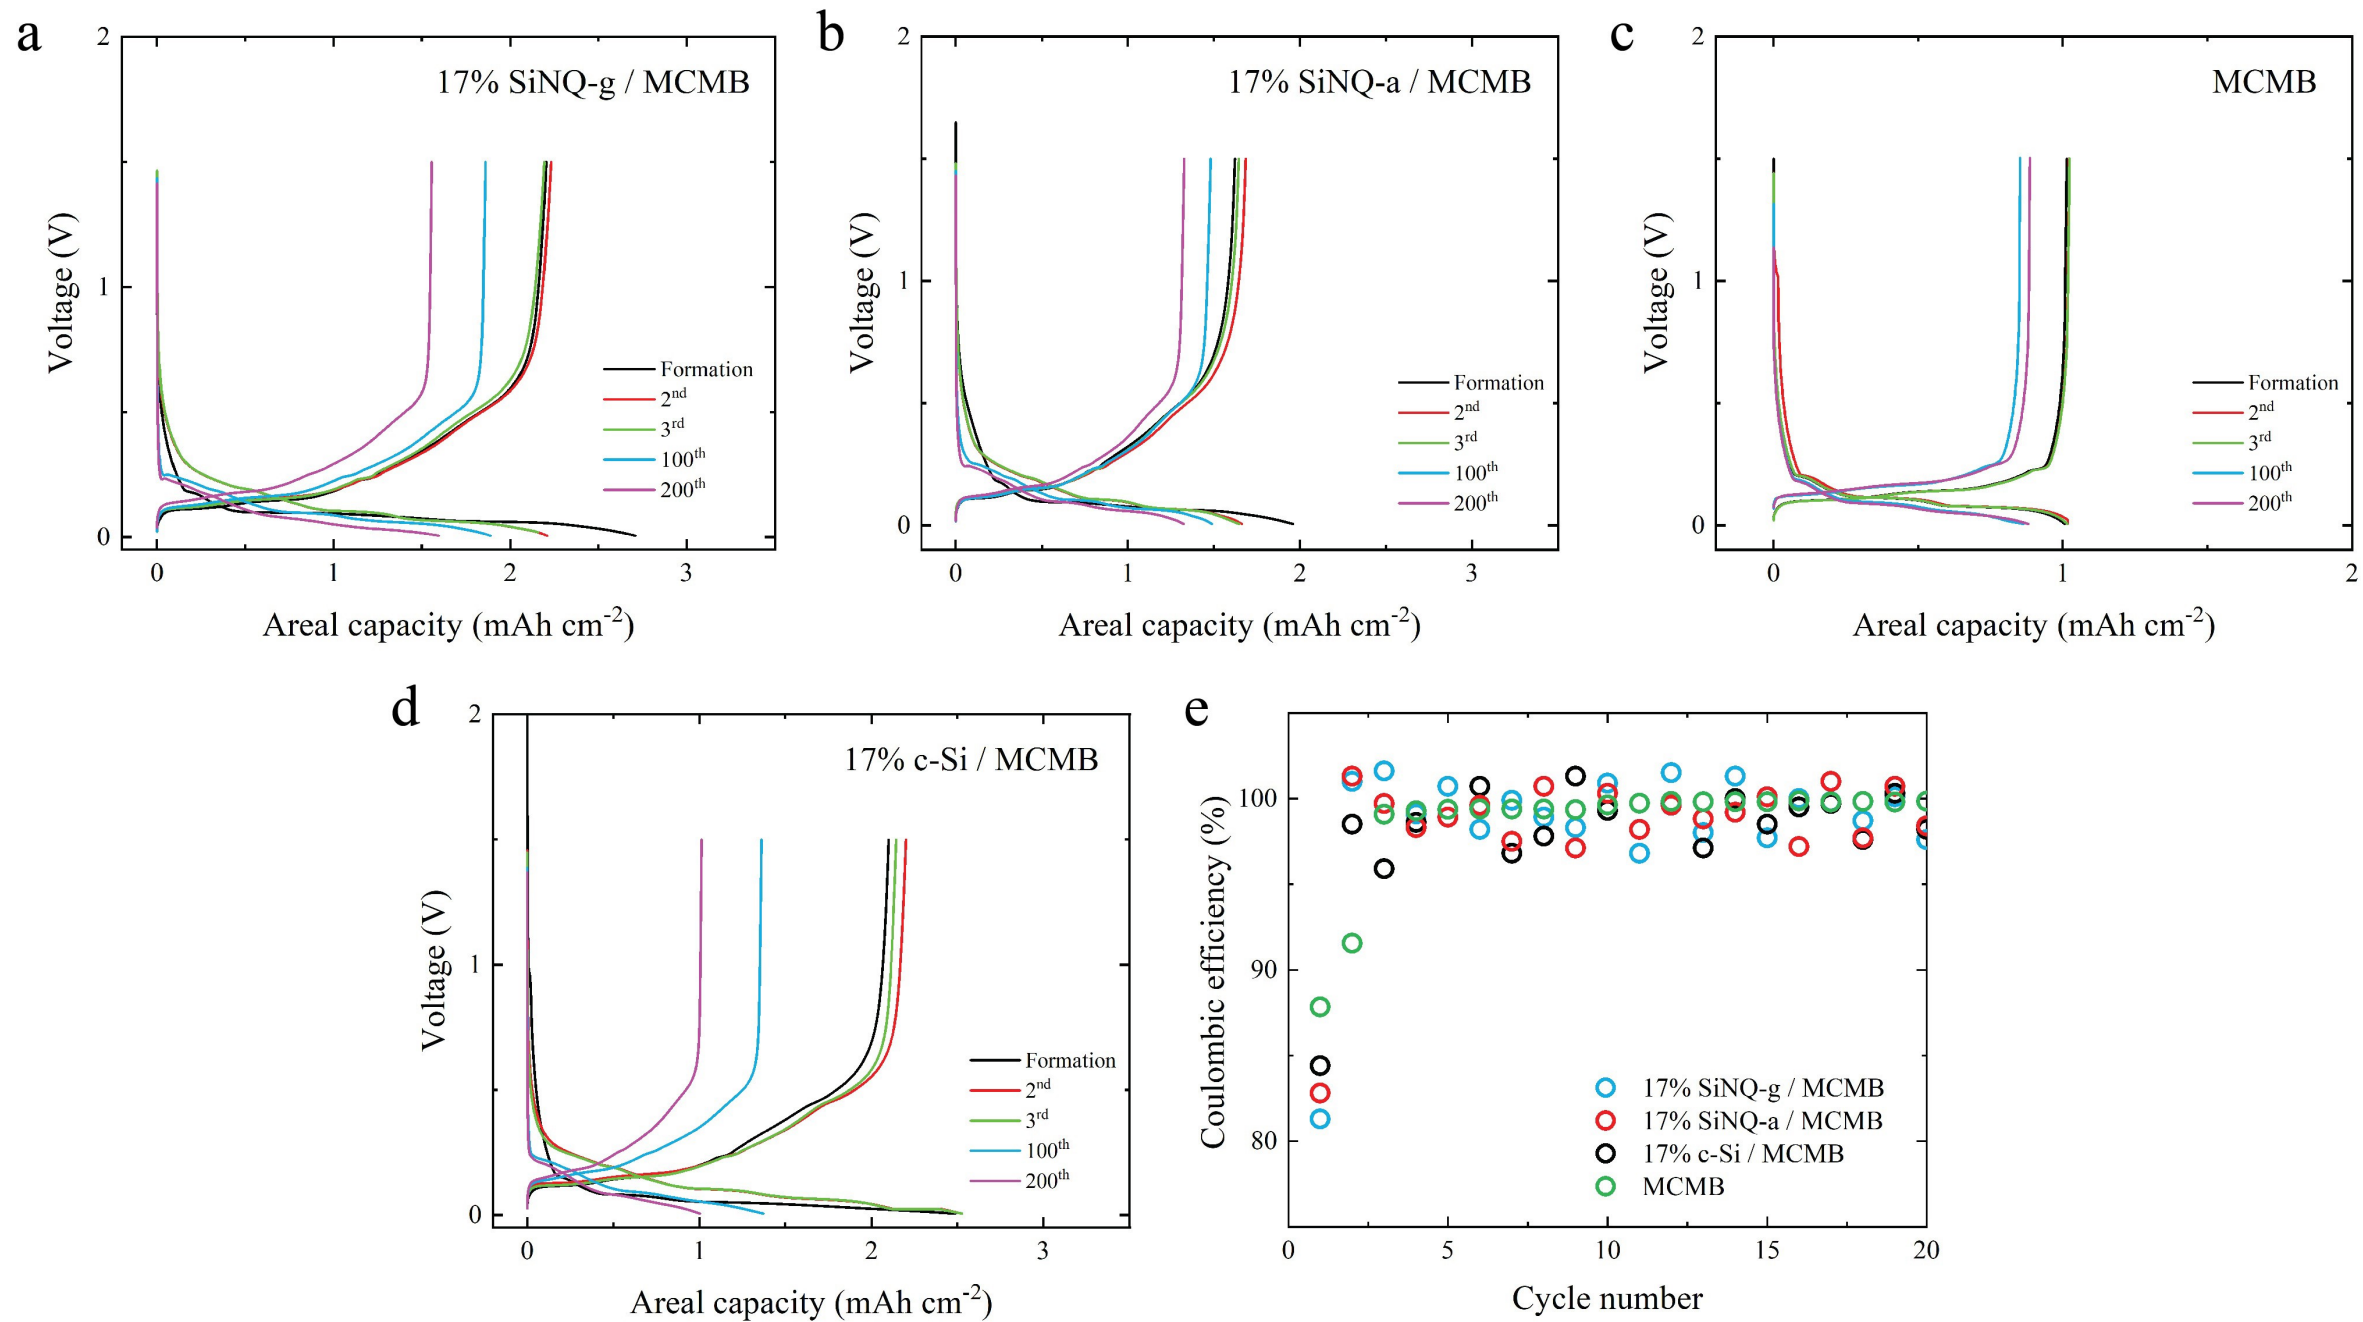

Supplement: d4gc00498a10.pdf [file d4gc00498a10.pdf]

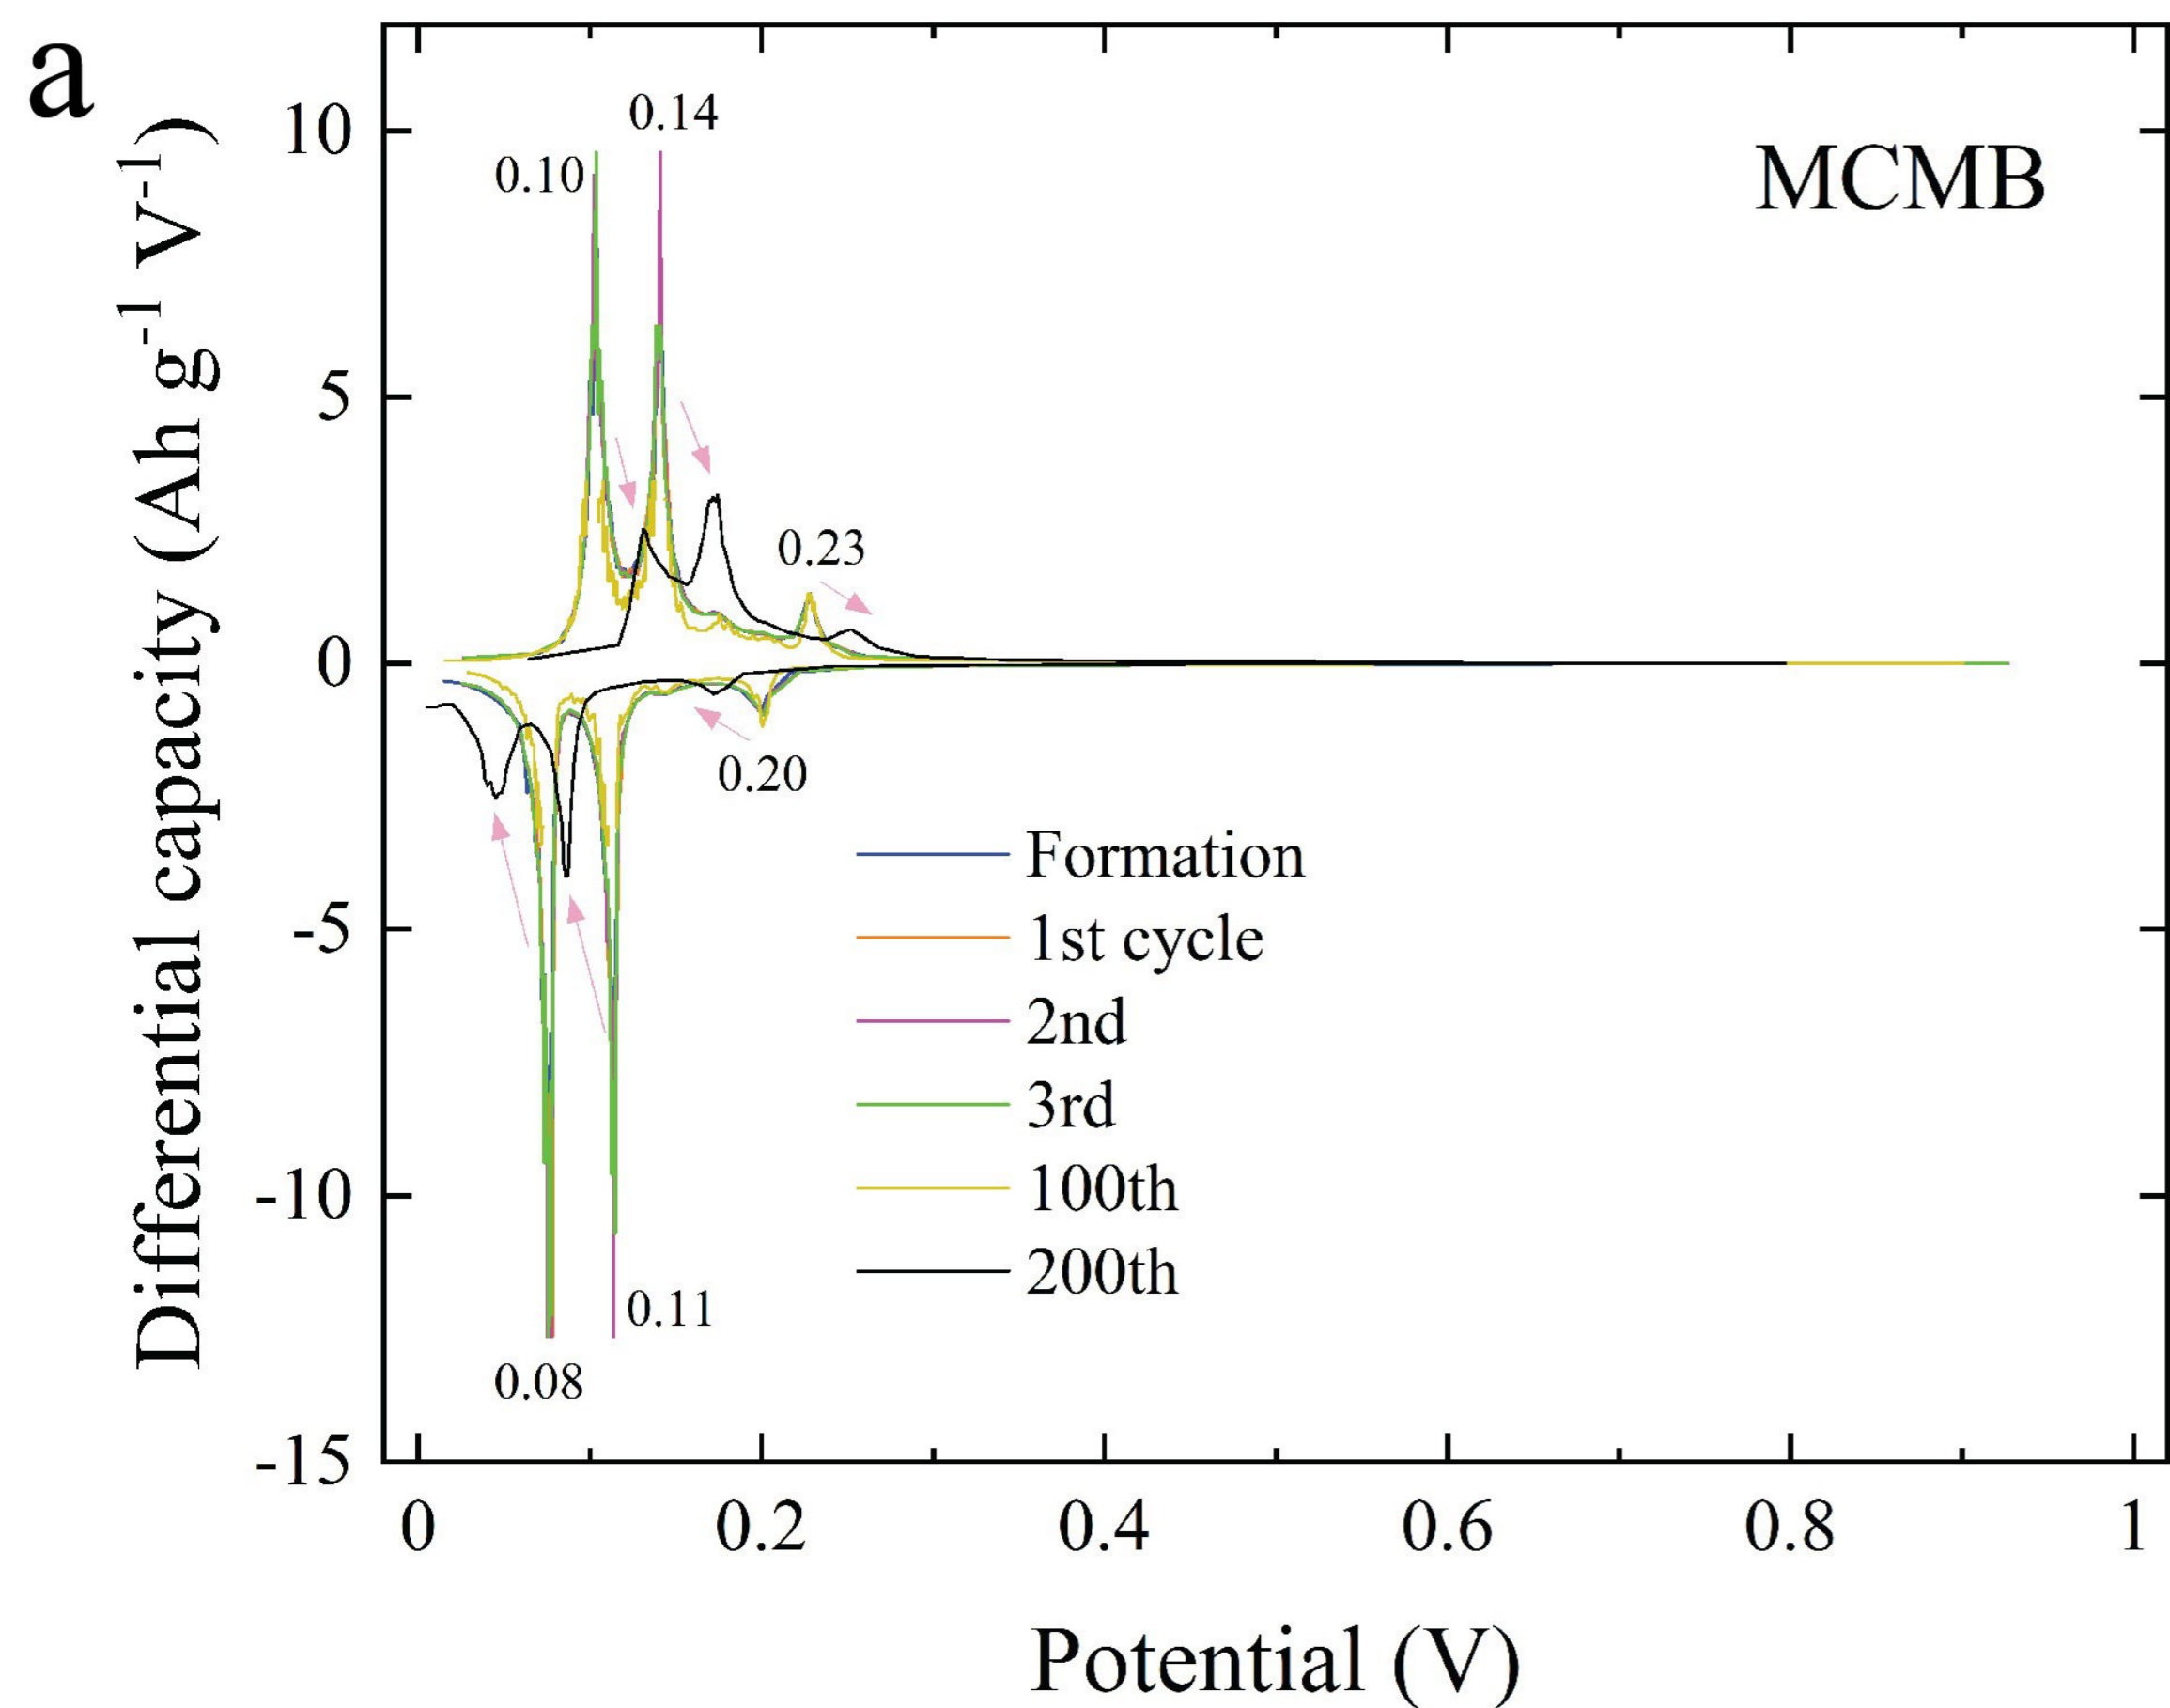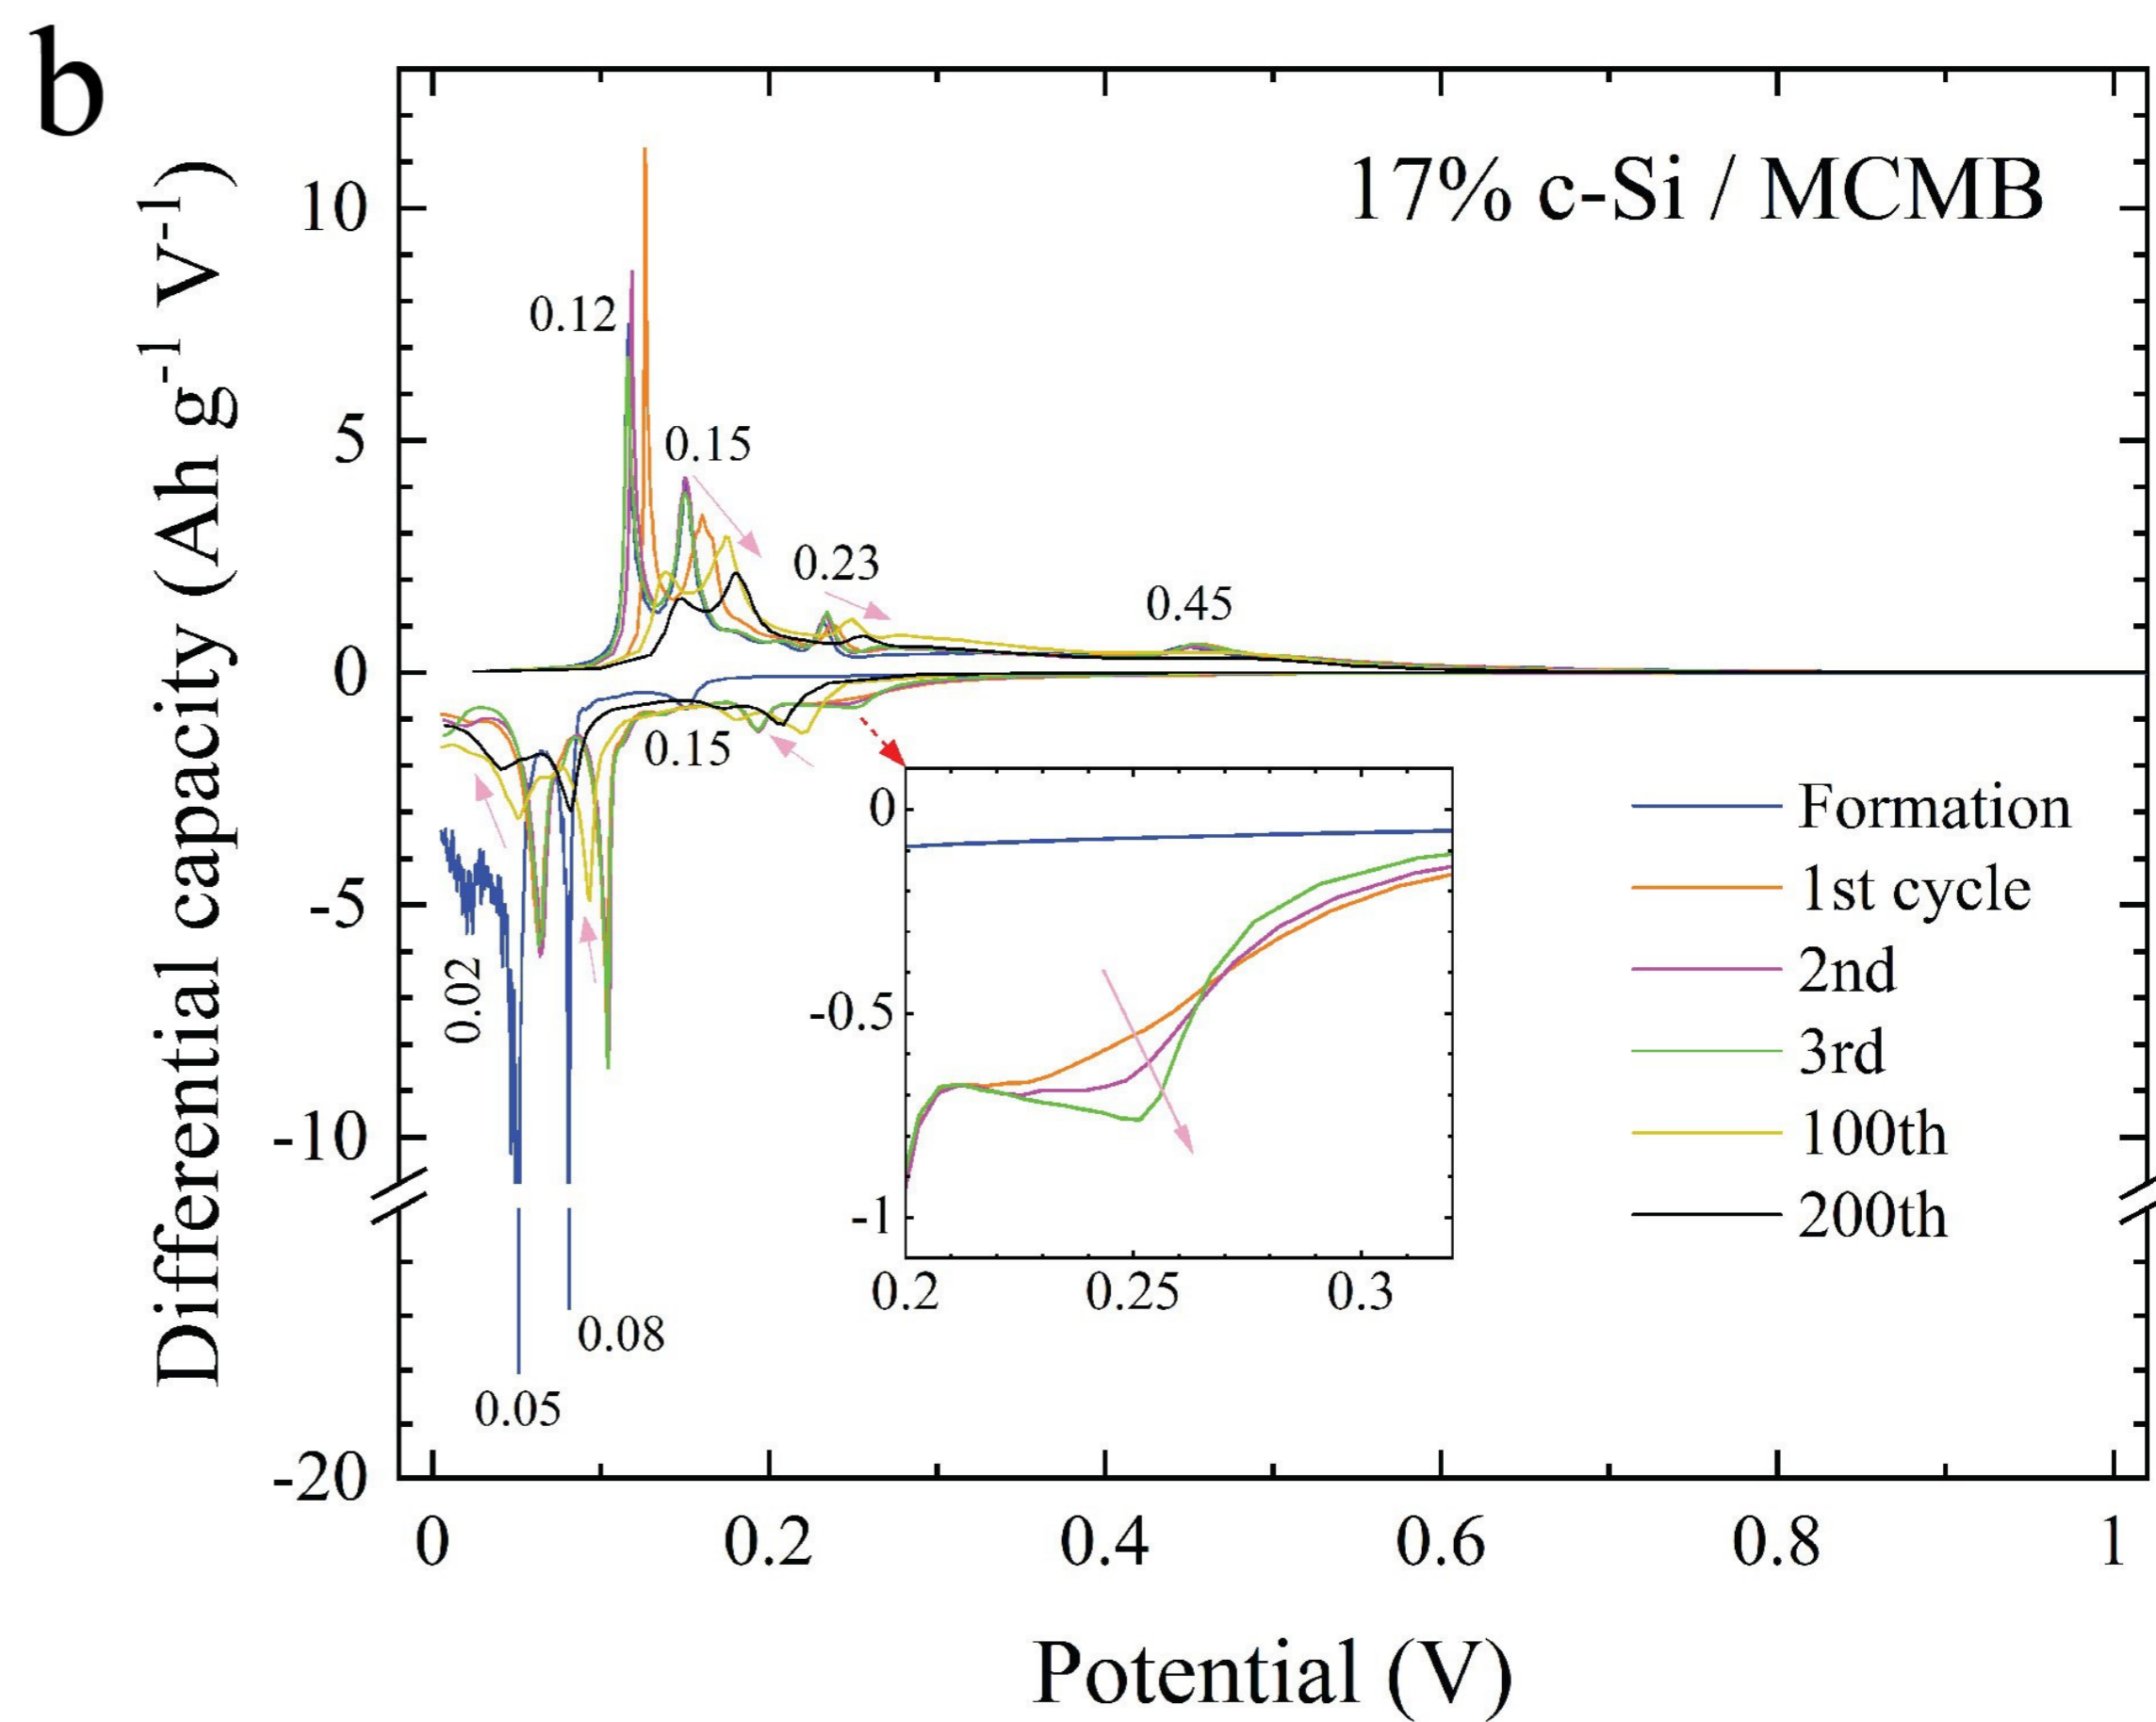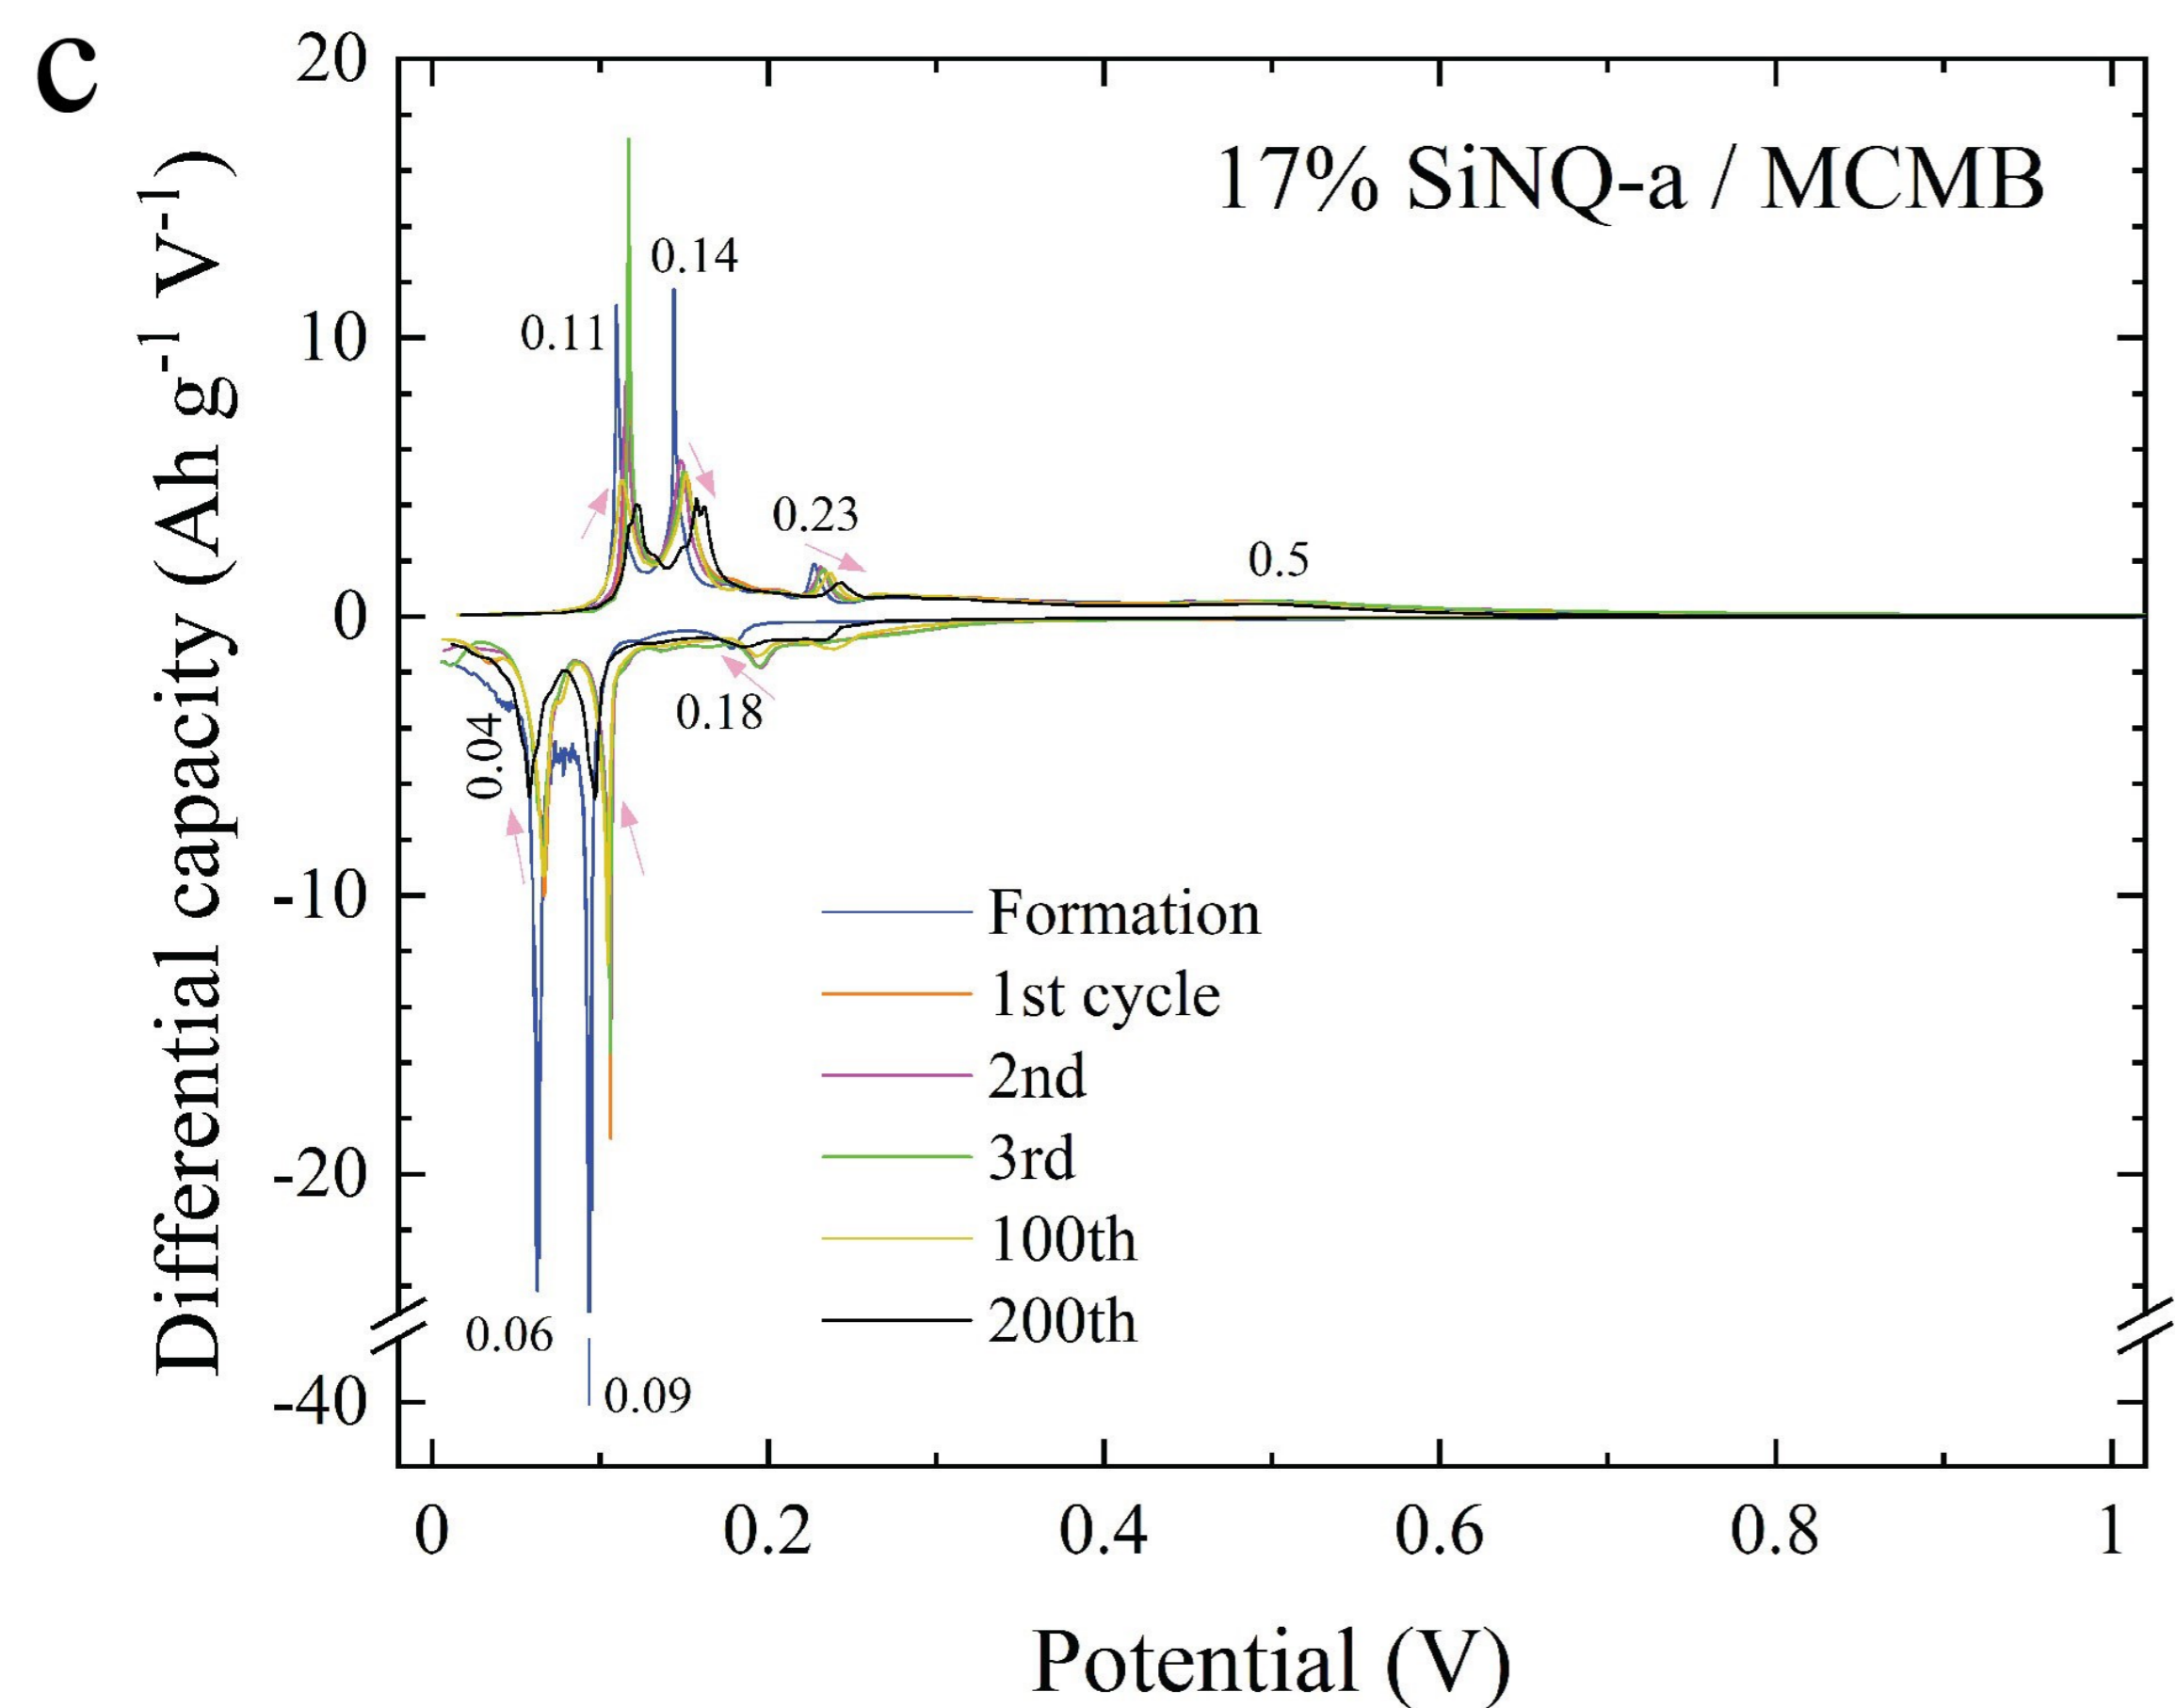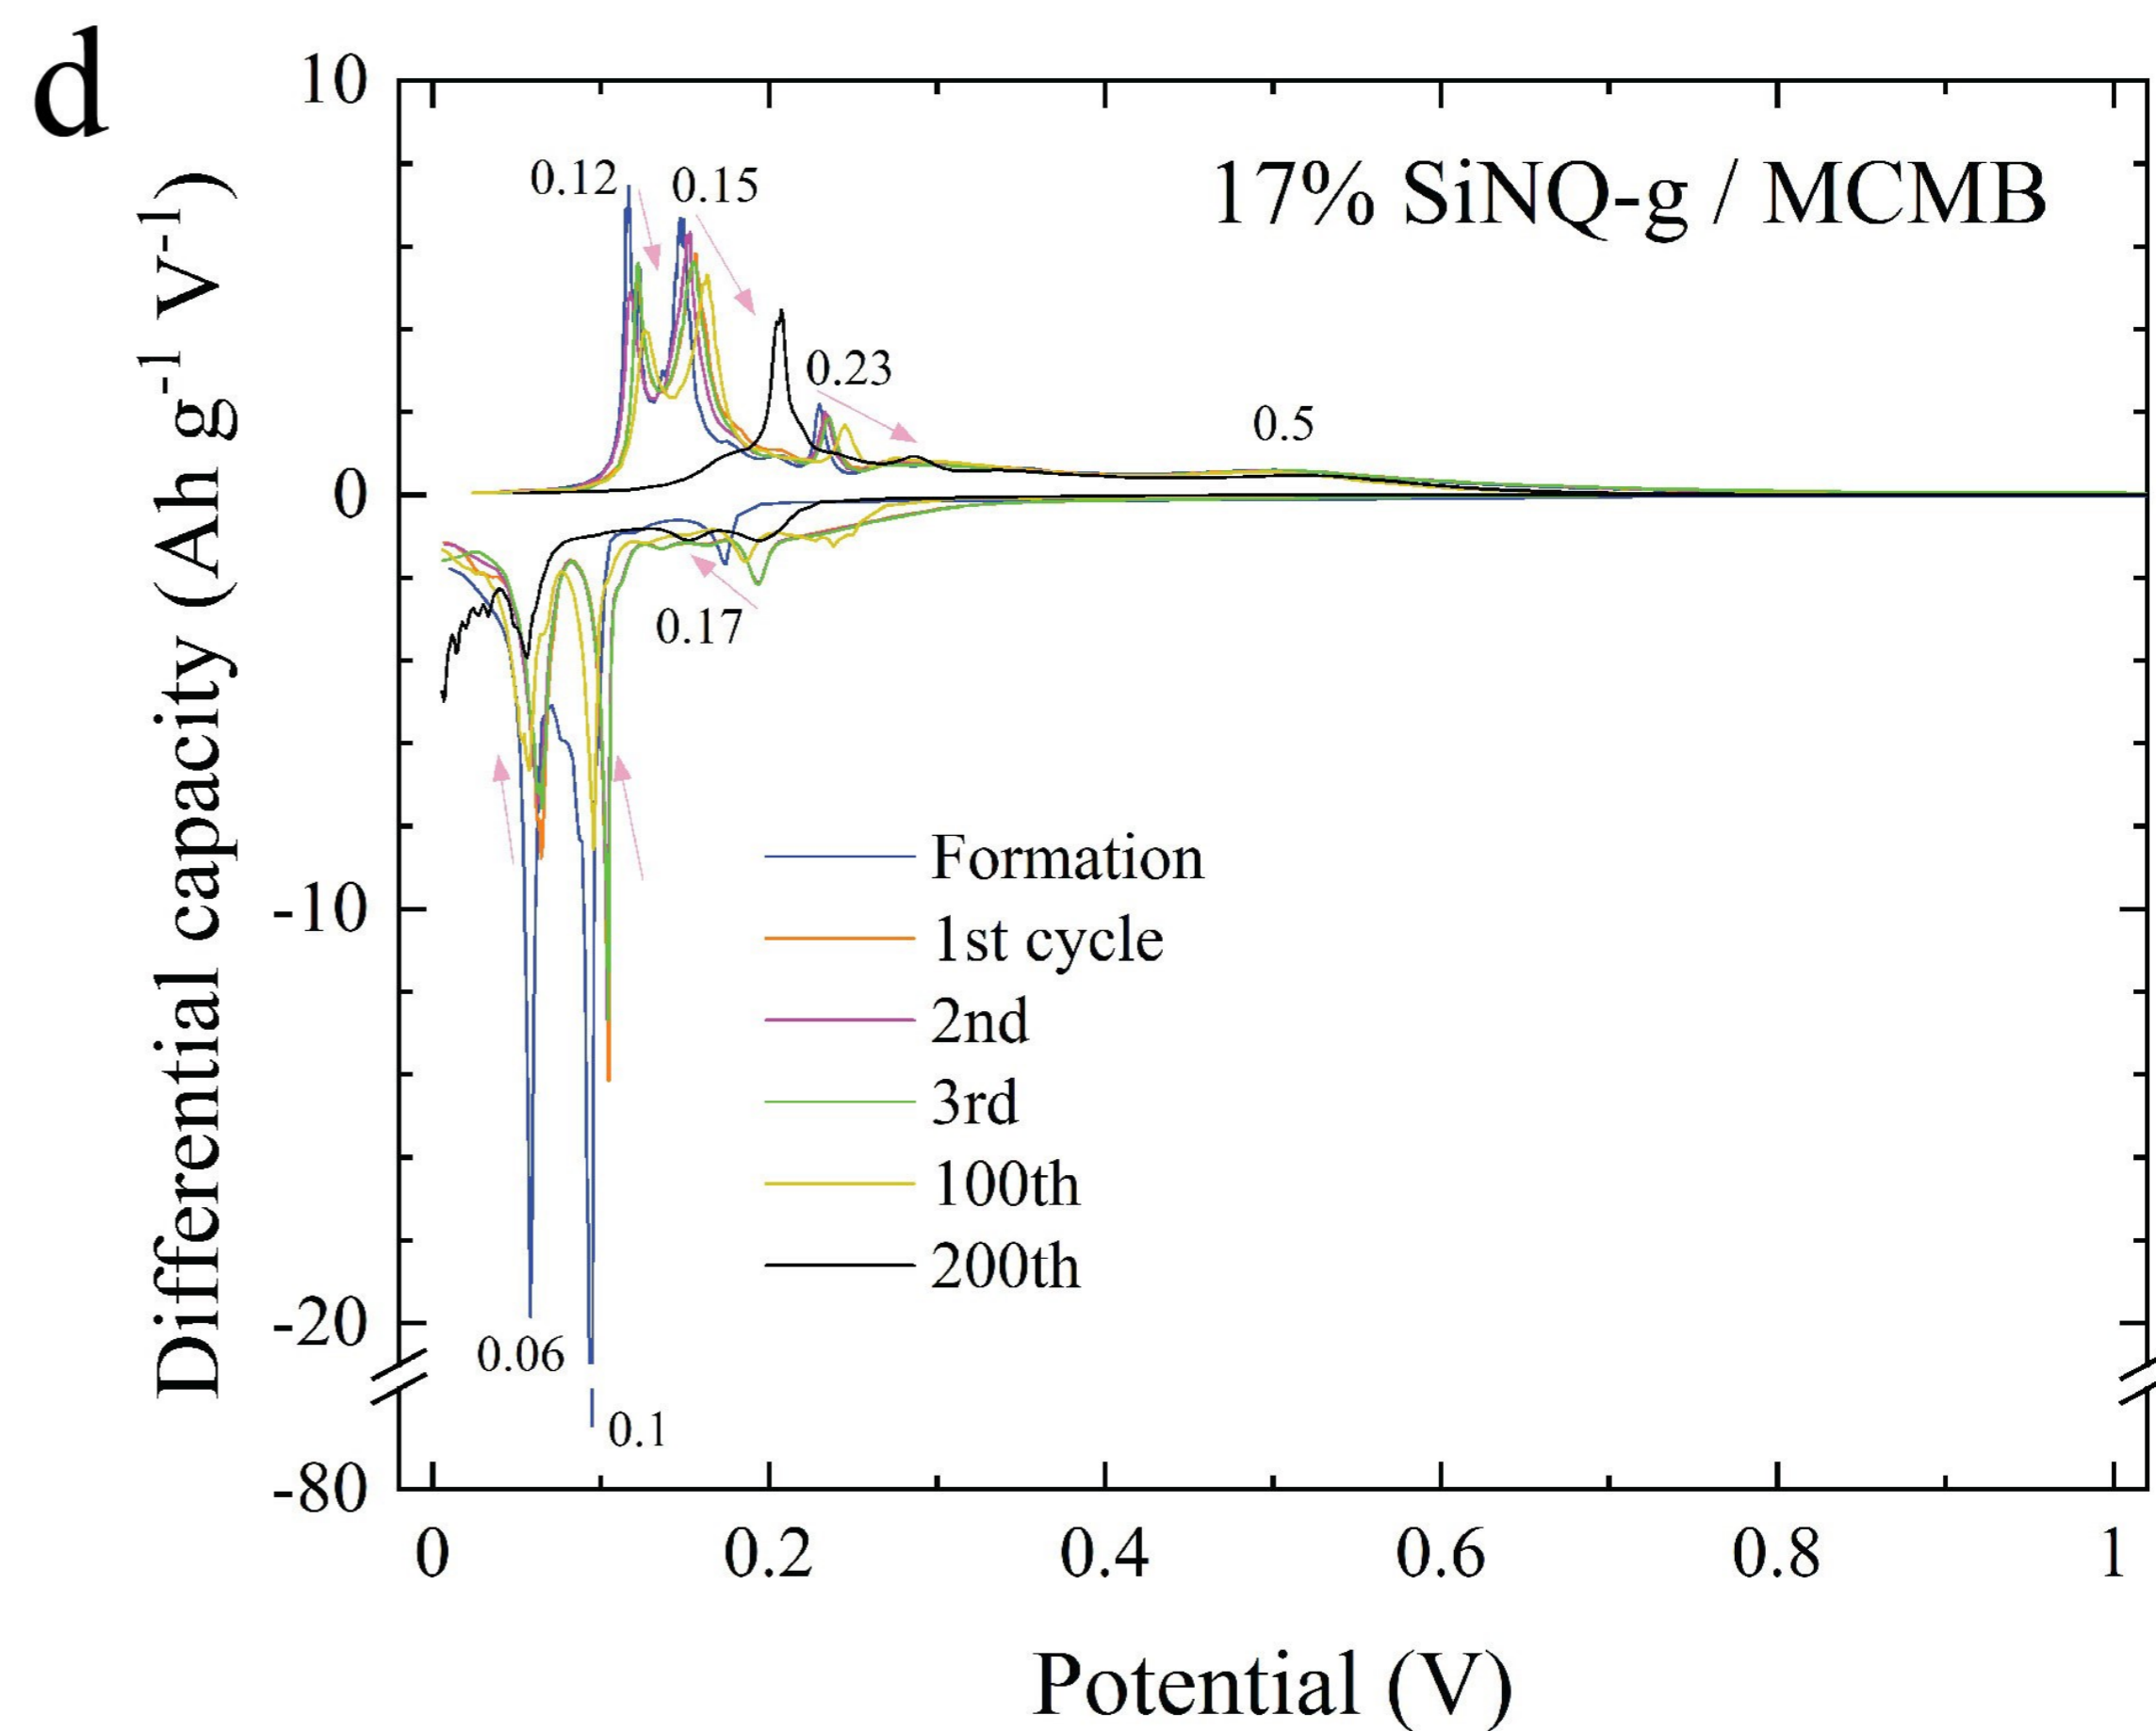

Supplement: d4gc00498a11.pdf [file d4gc00498a11.pdf]

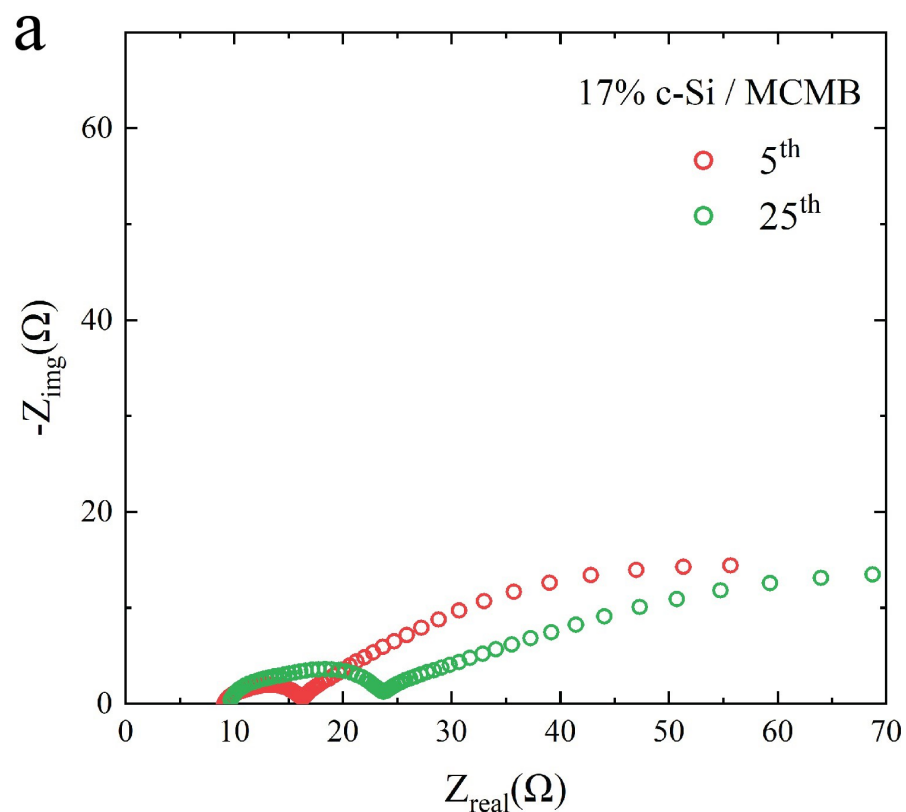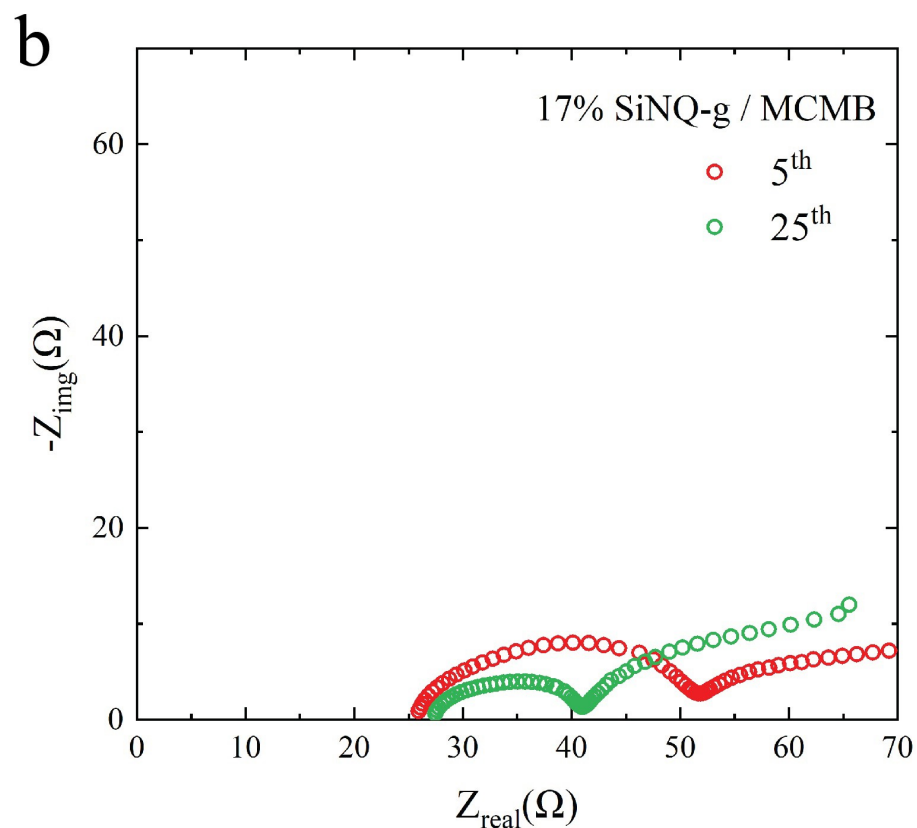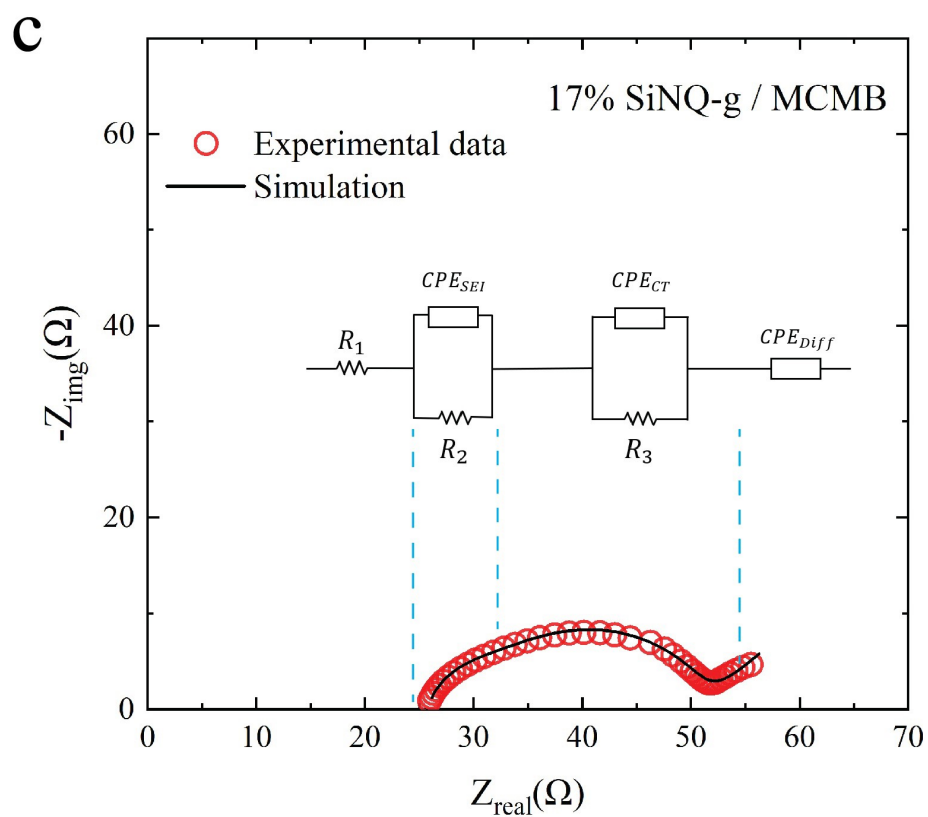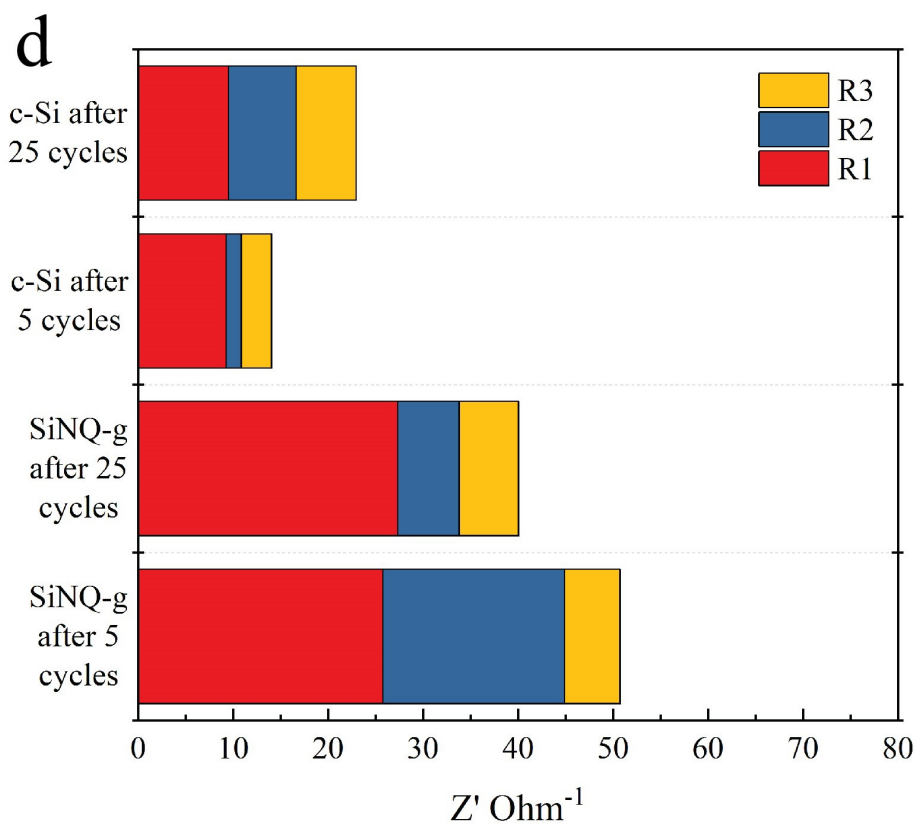

Supplement: d4gc00498a12.pdf [file d4gc00498a12.pdf]

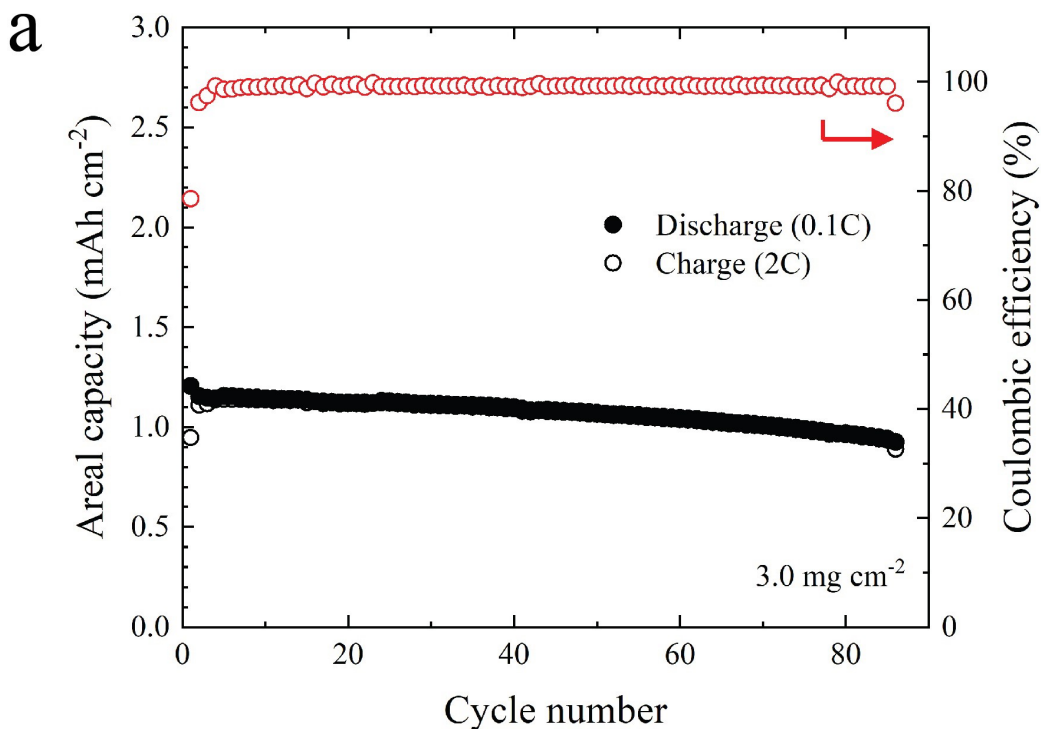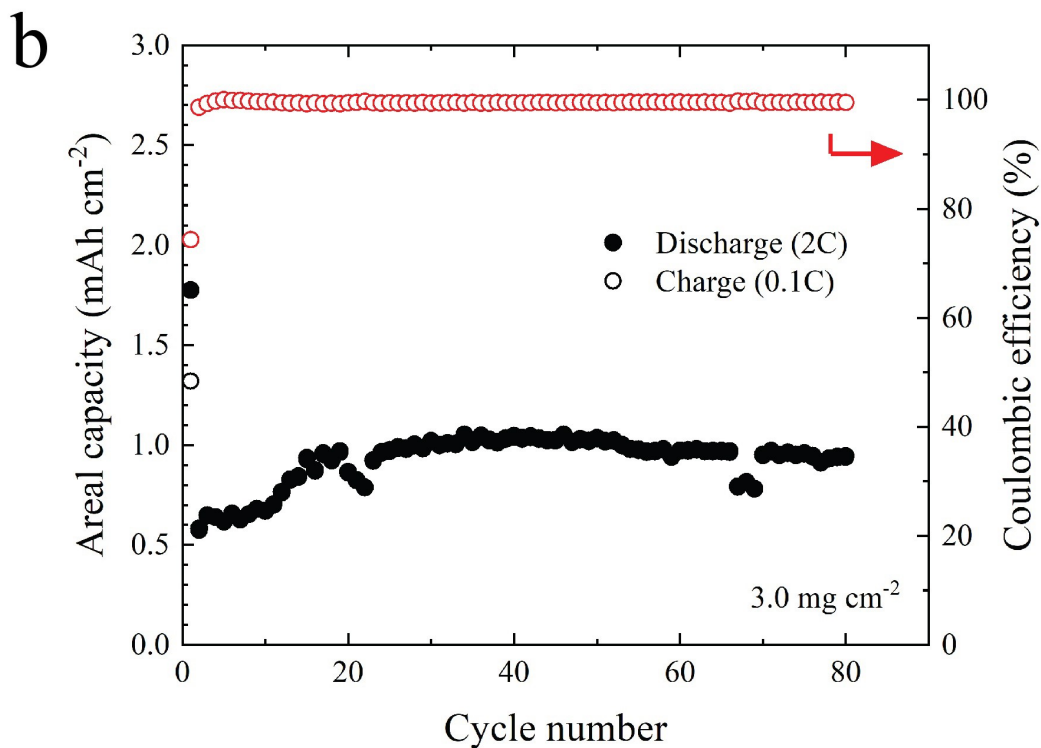

Supplement: d4gc00498a13.pdf [file d4gc00498a13.pdf]

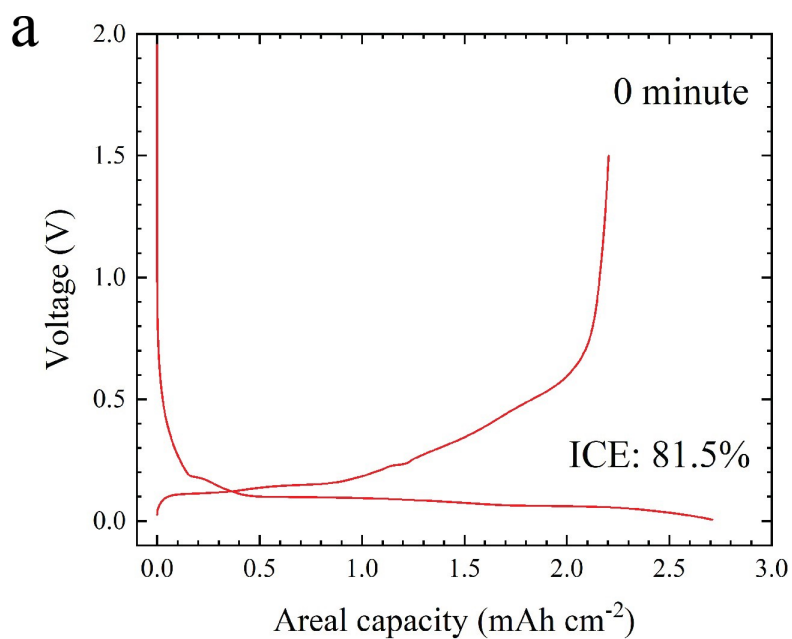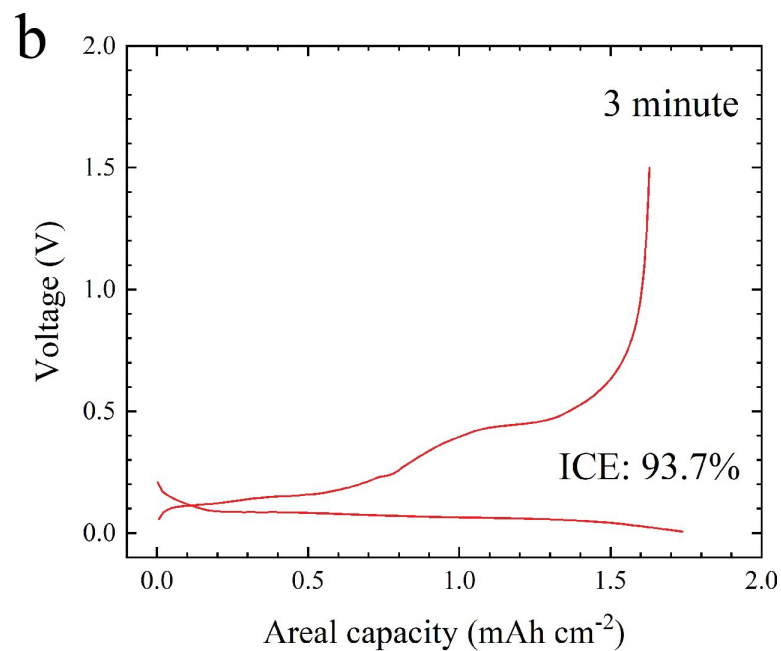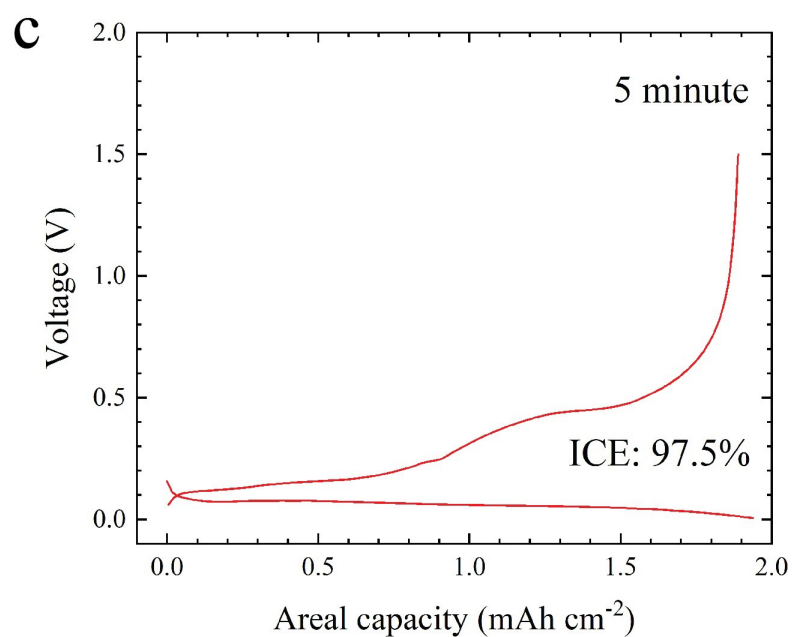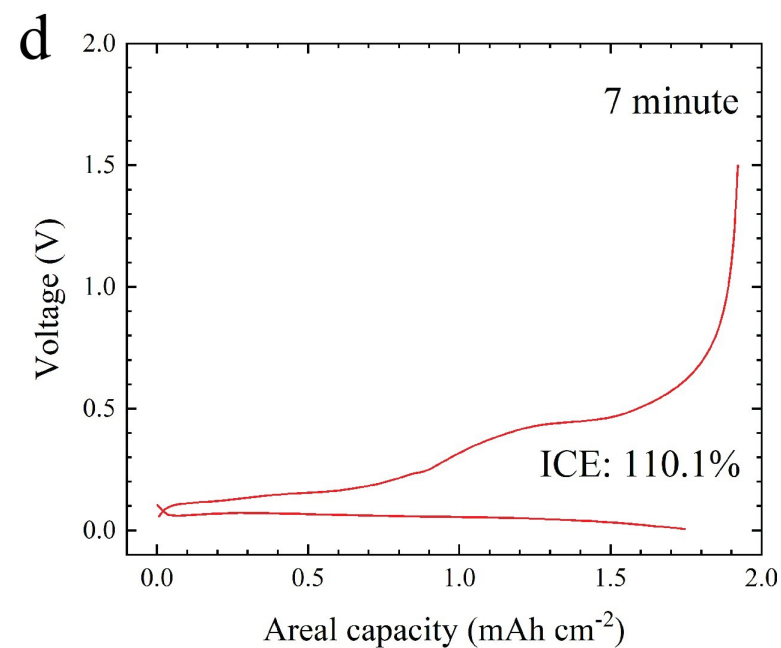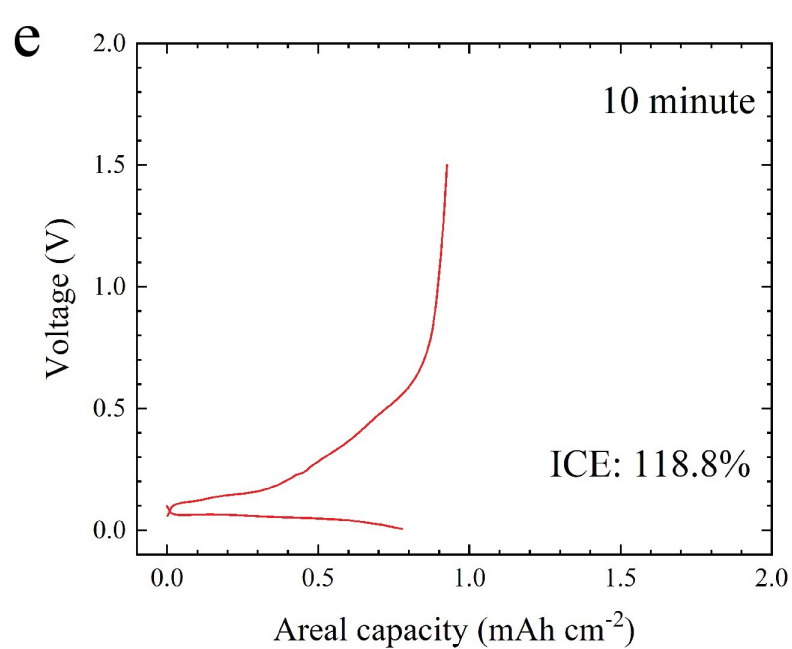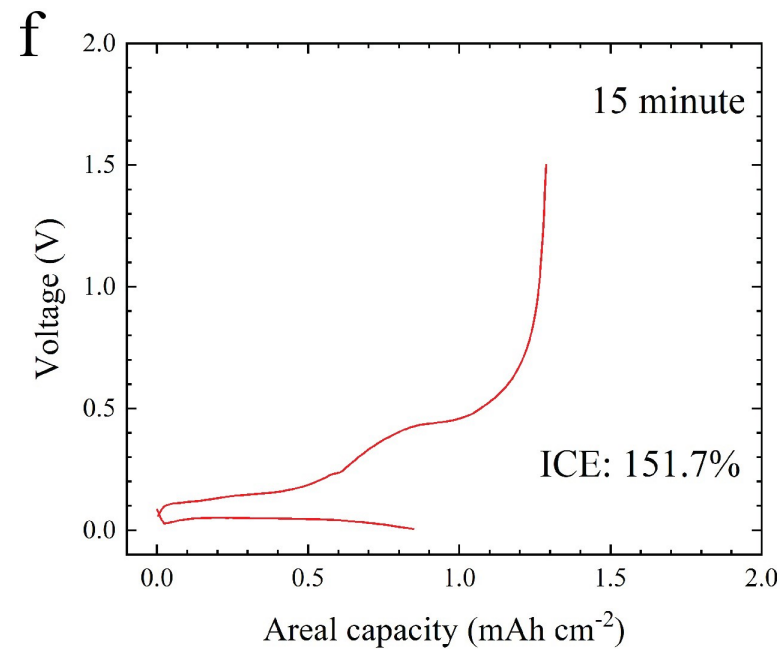

Supplement: d4gc00498a14.pdf [file d4gc00498a14.pdf]

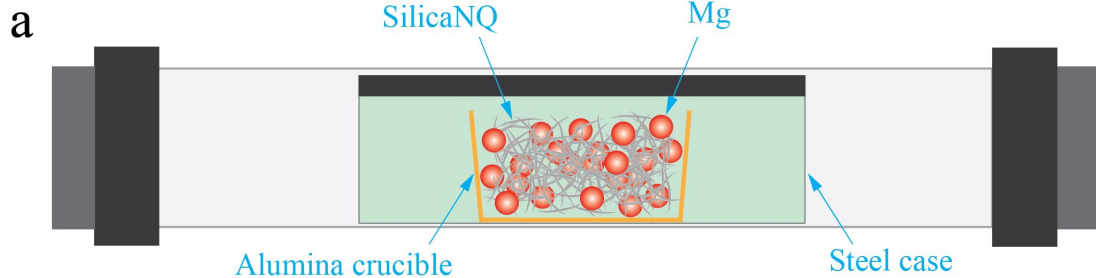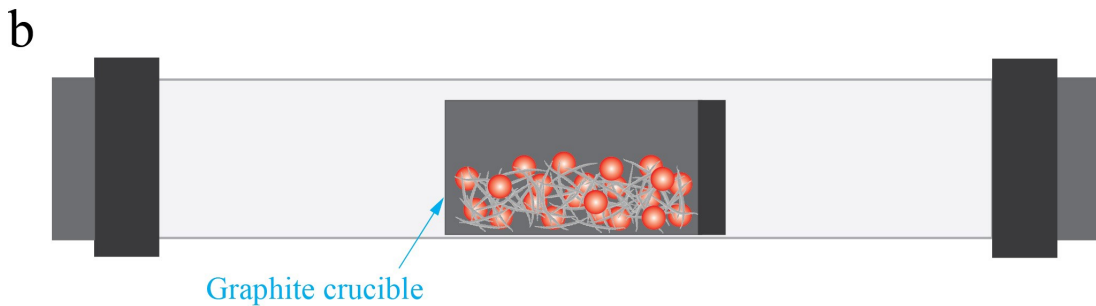

Supplement: d4gc00498a2.pdf [file d4gc00498a2.pdf]

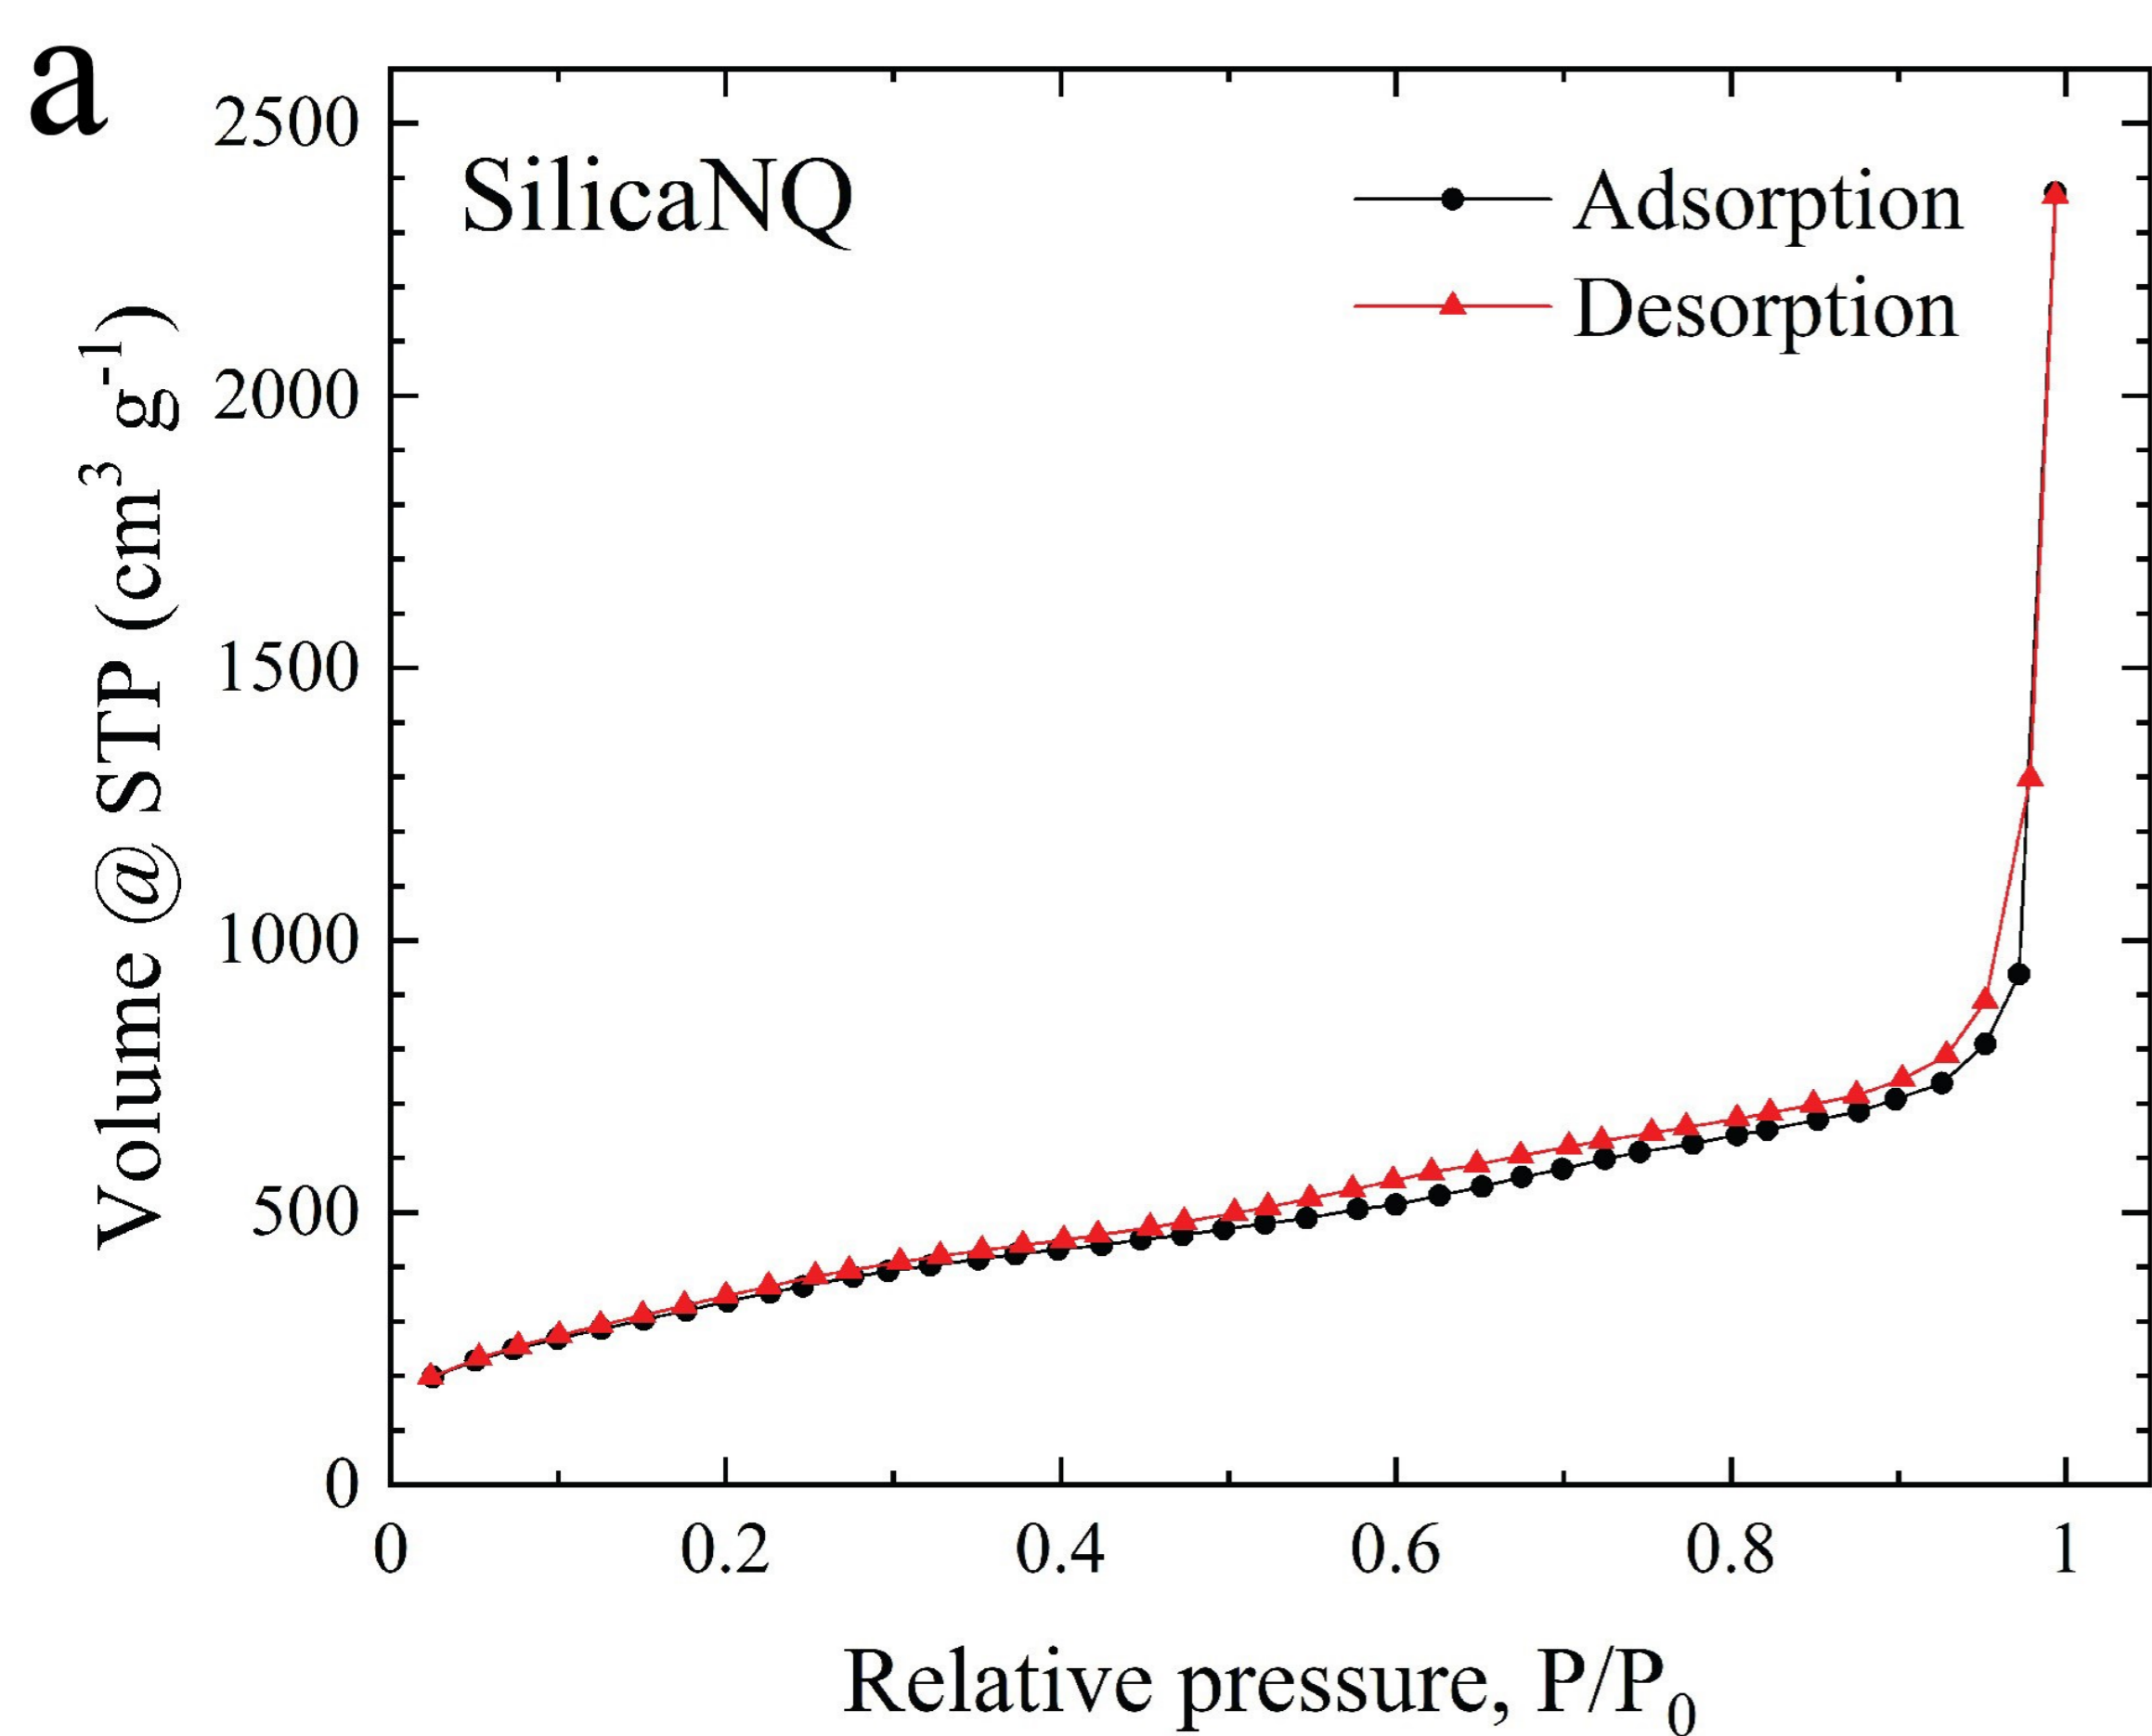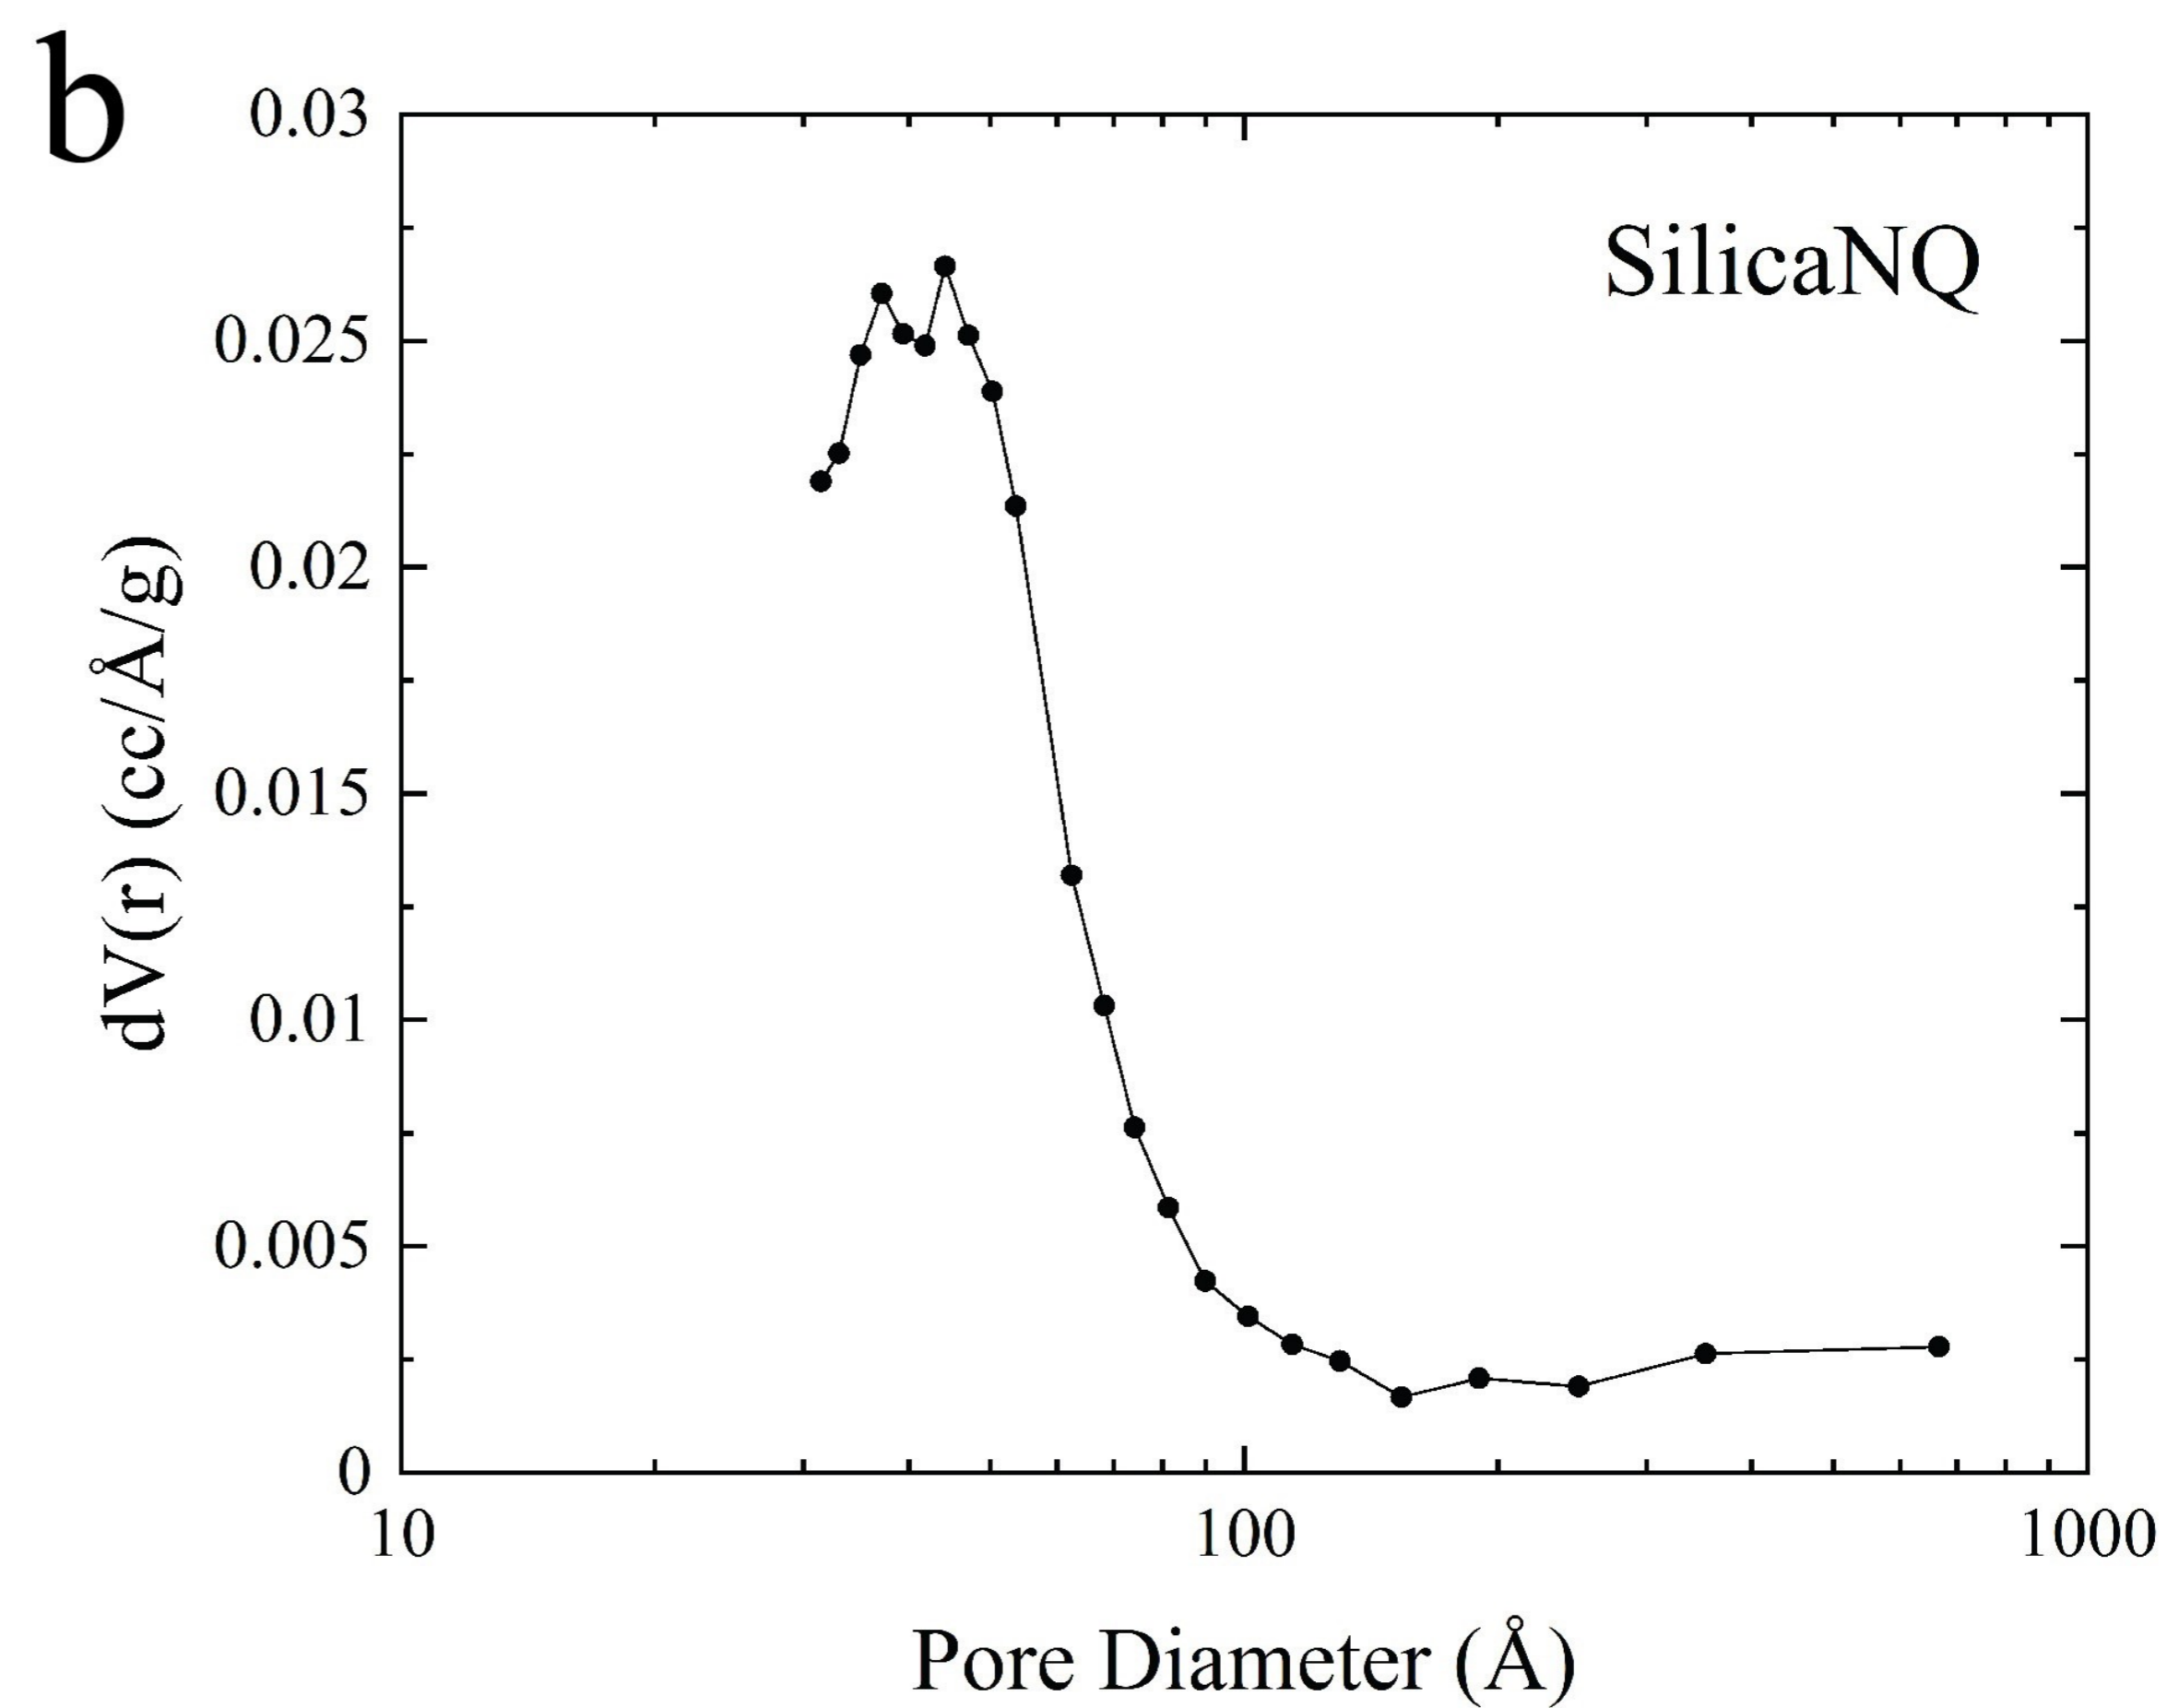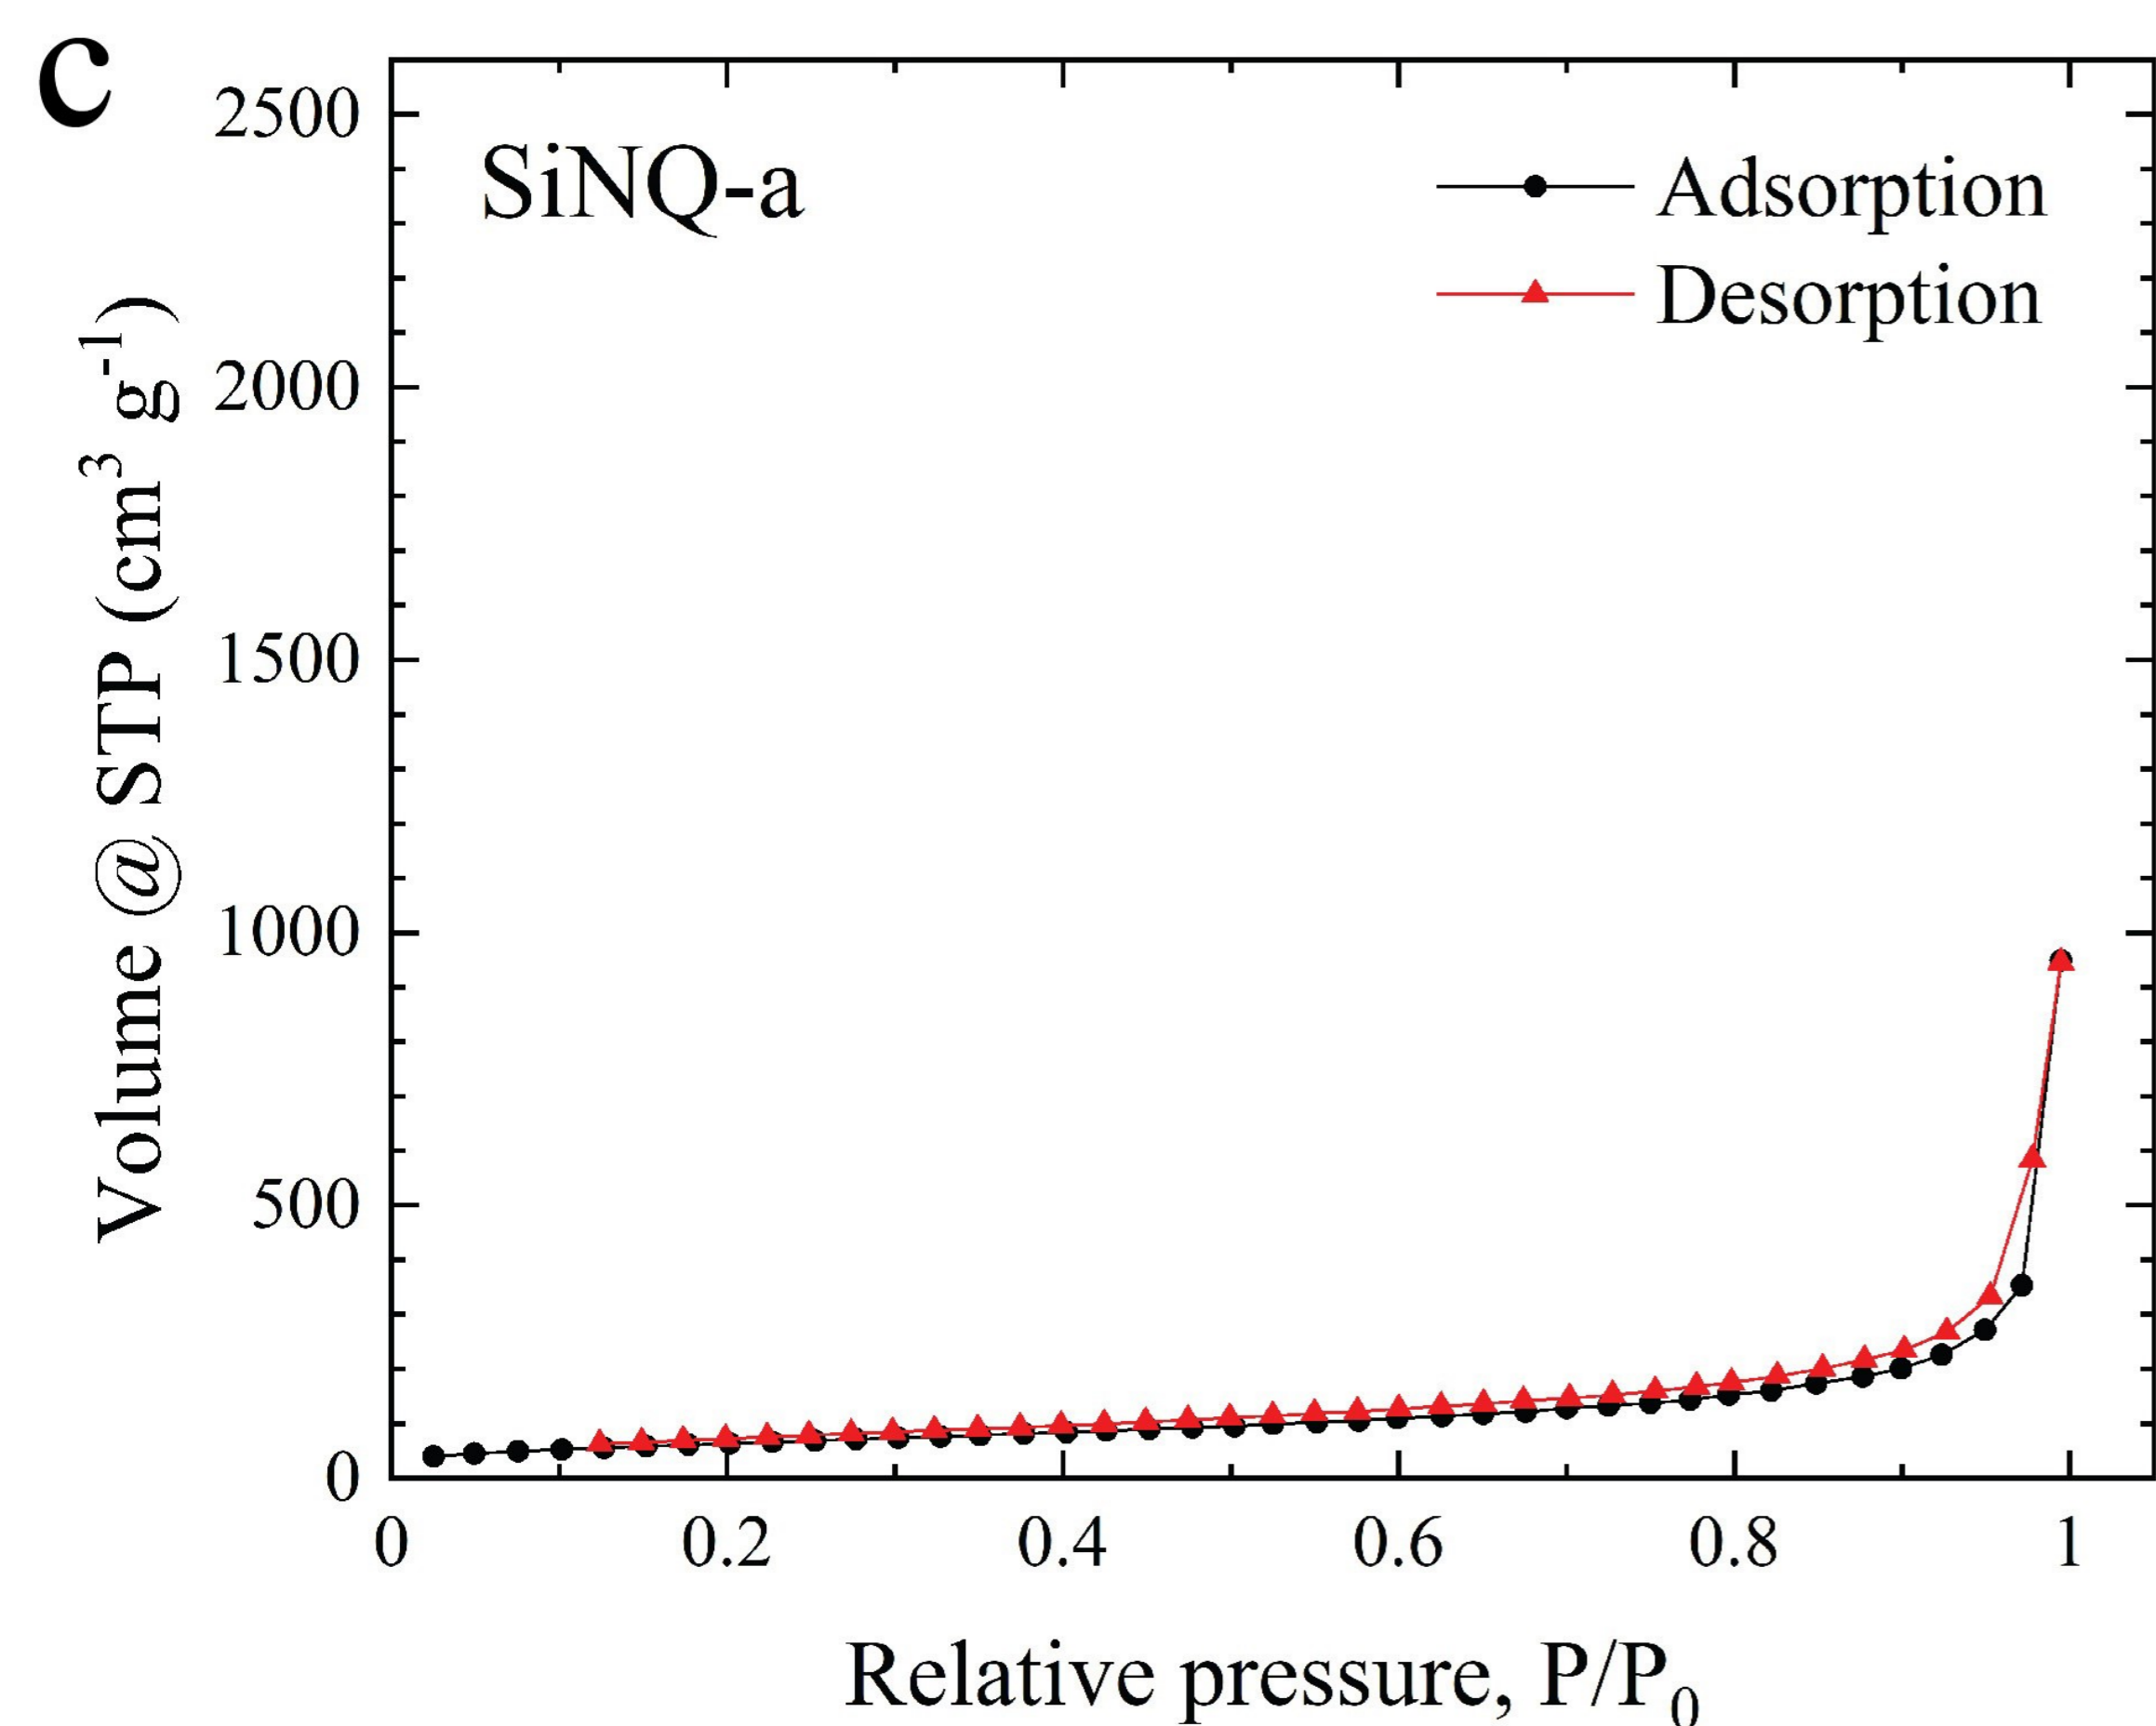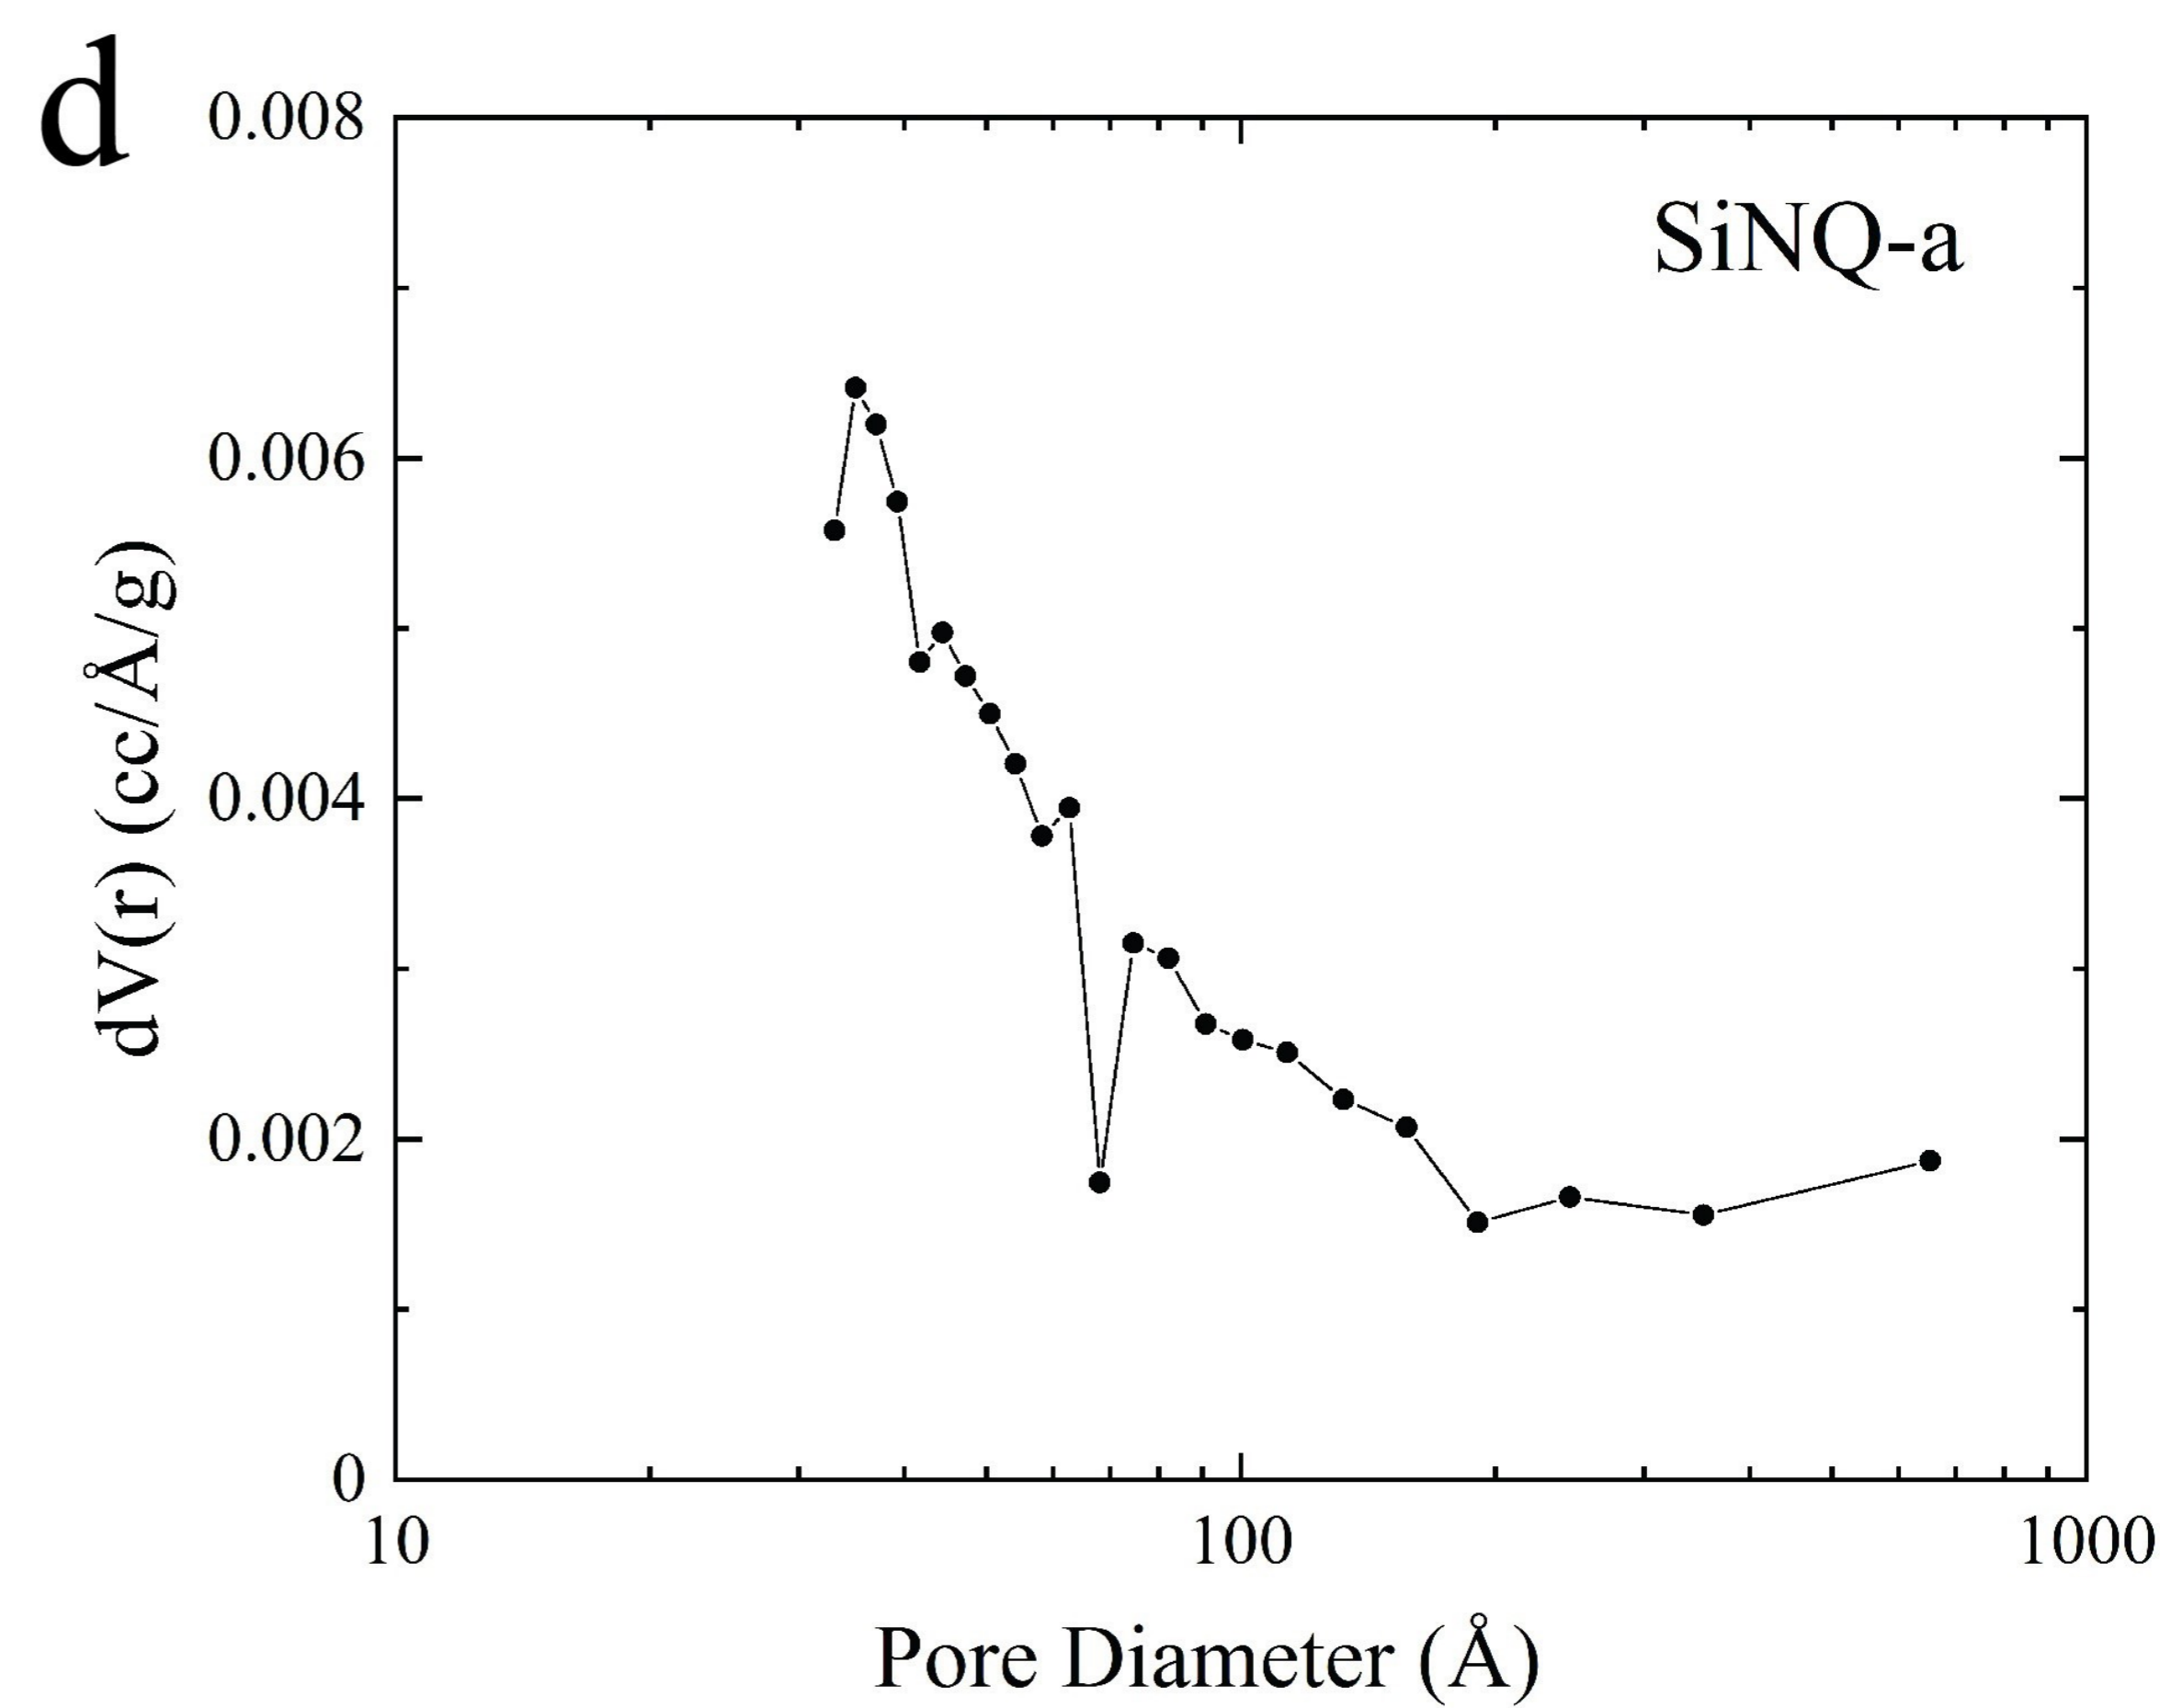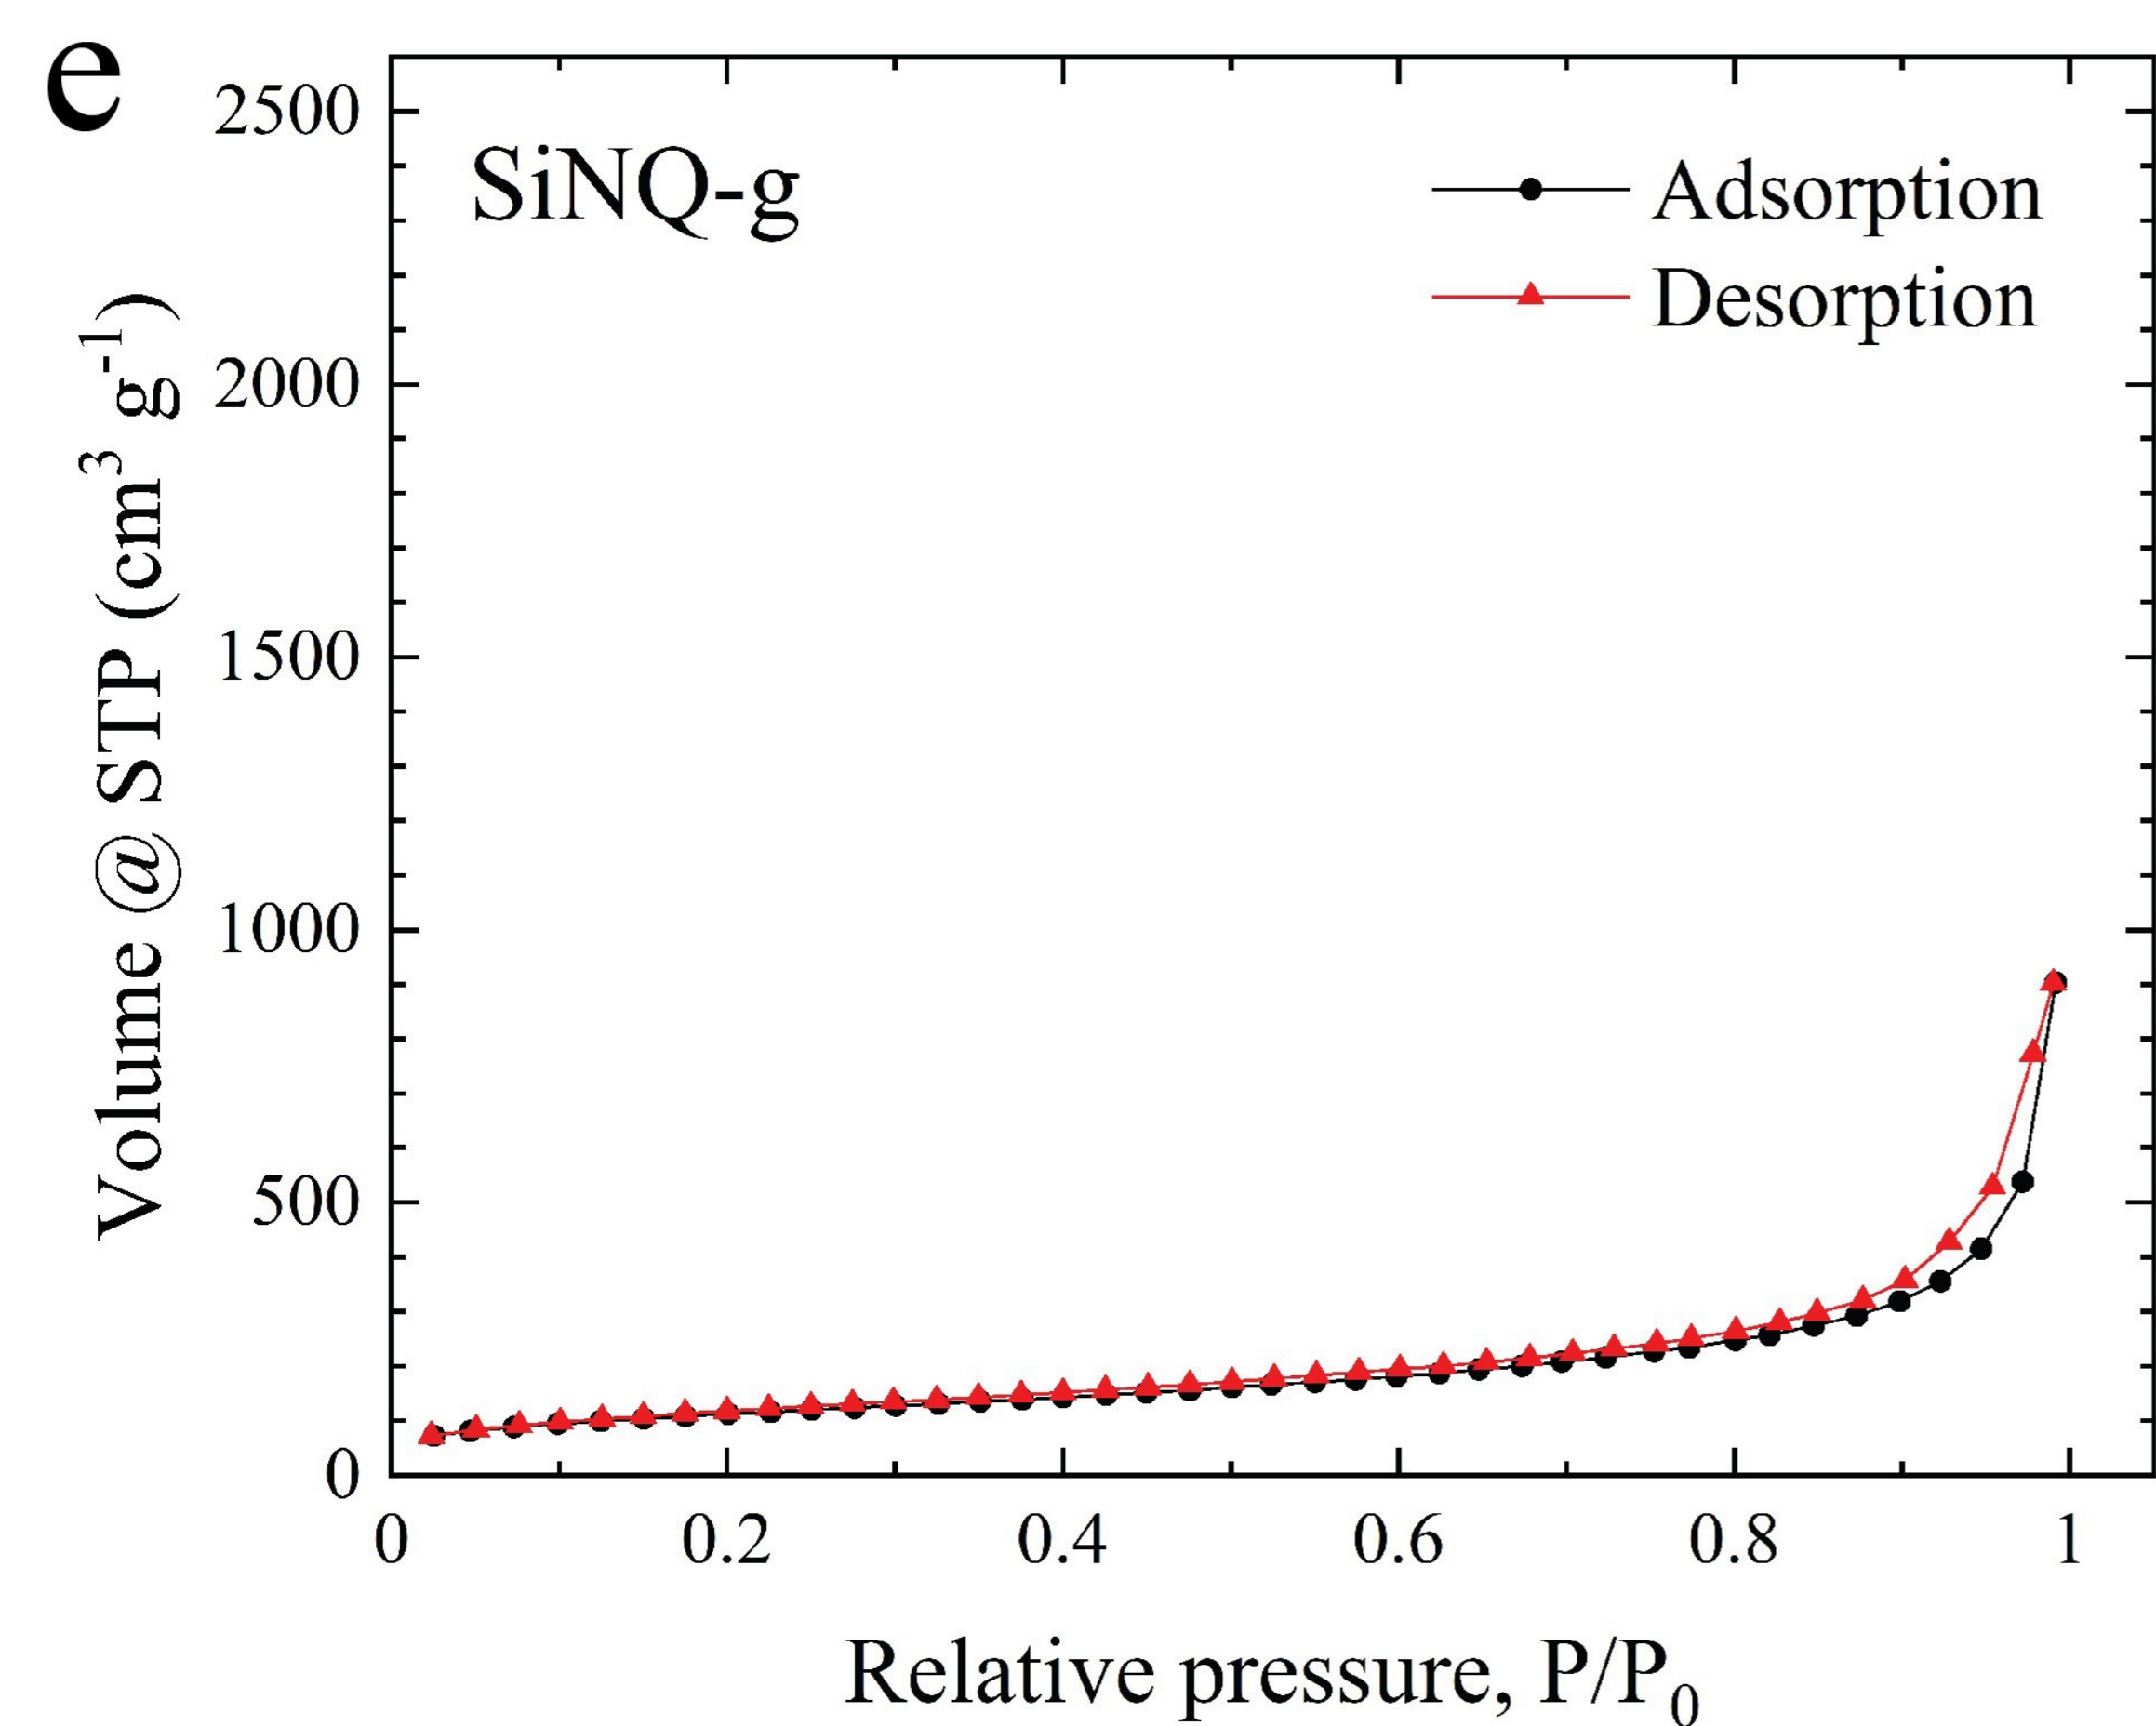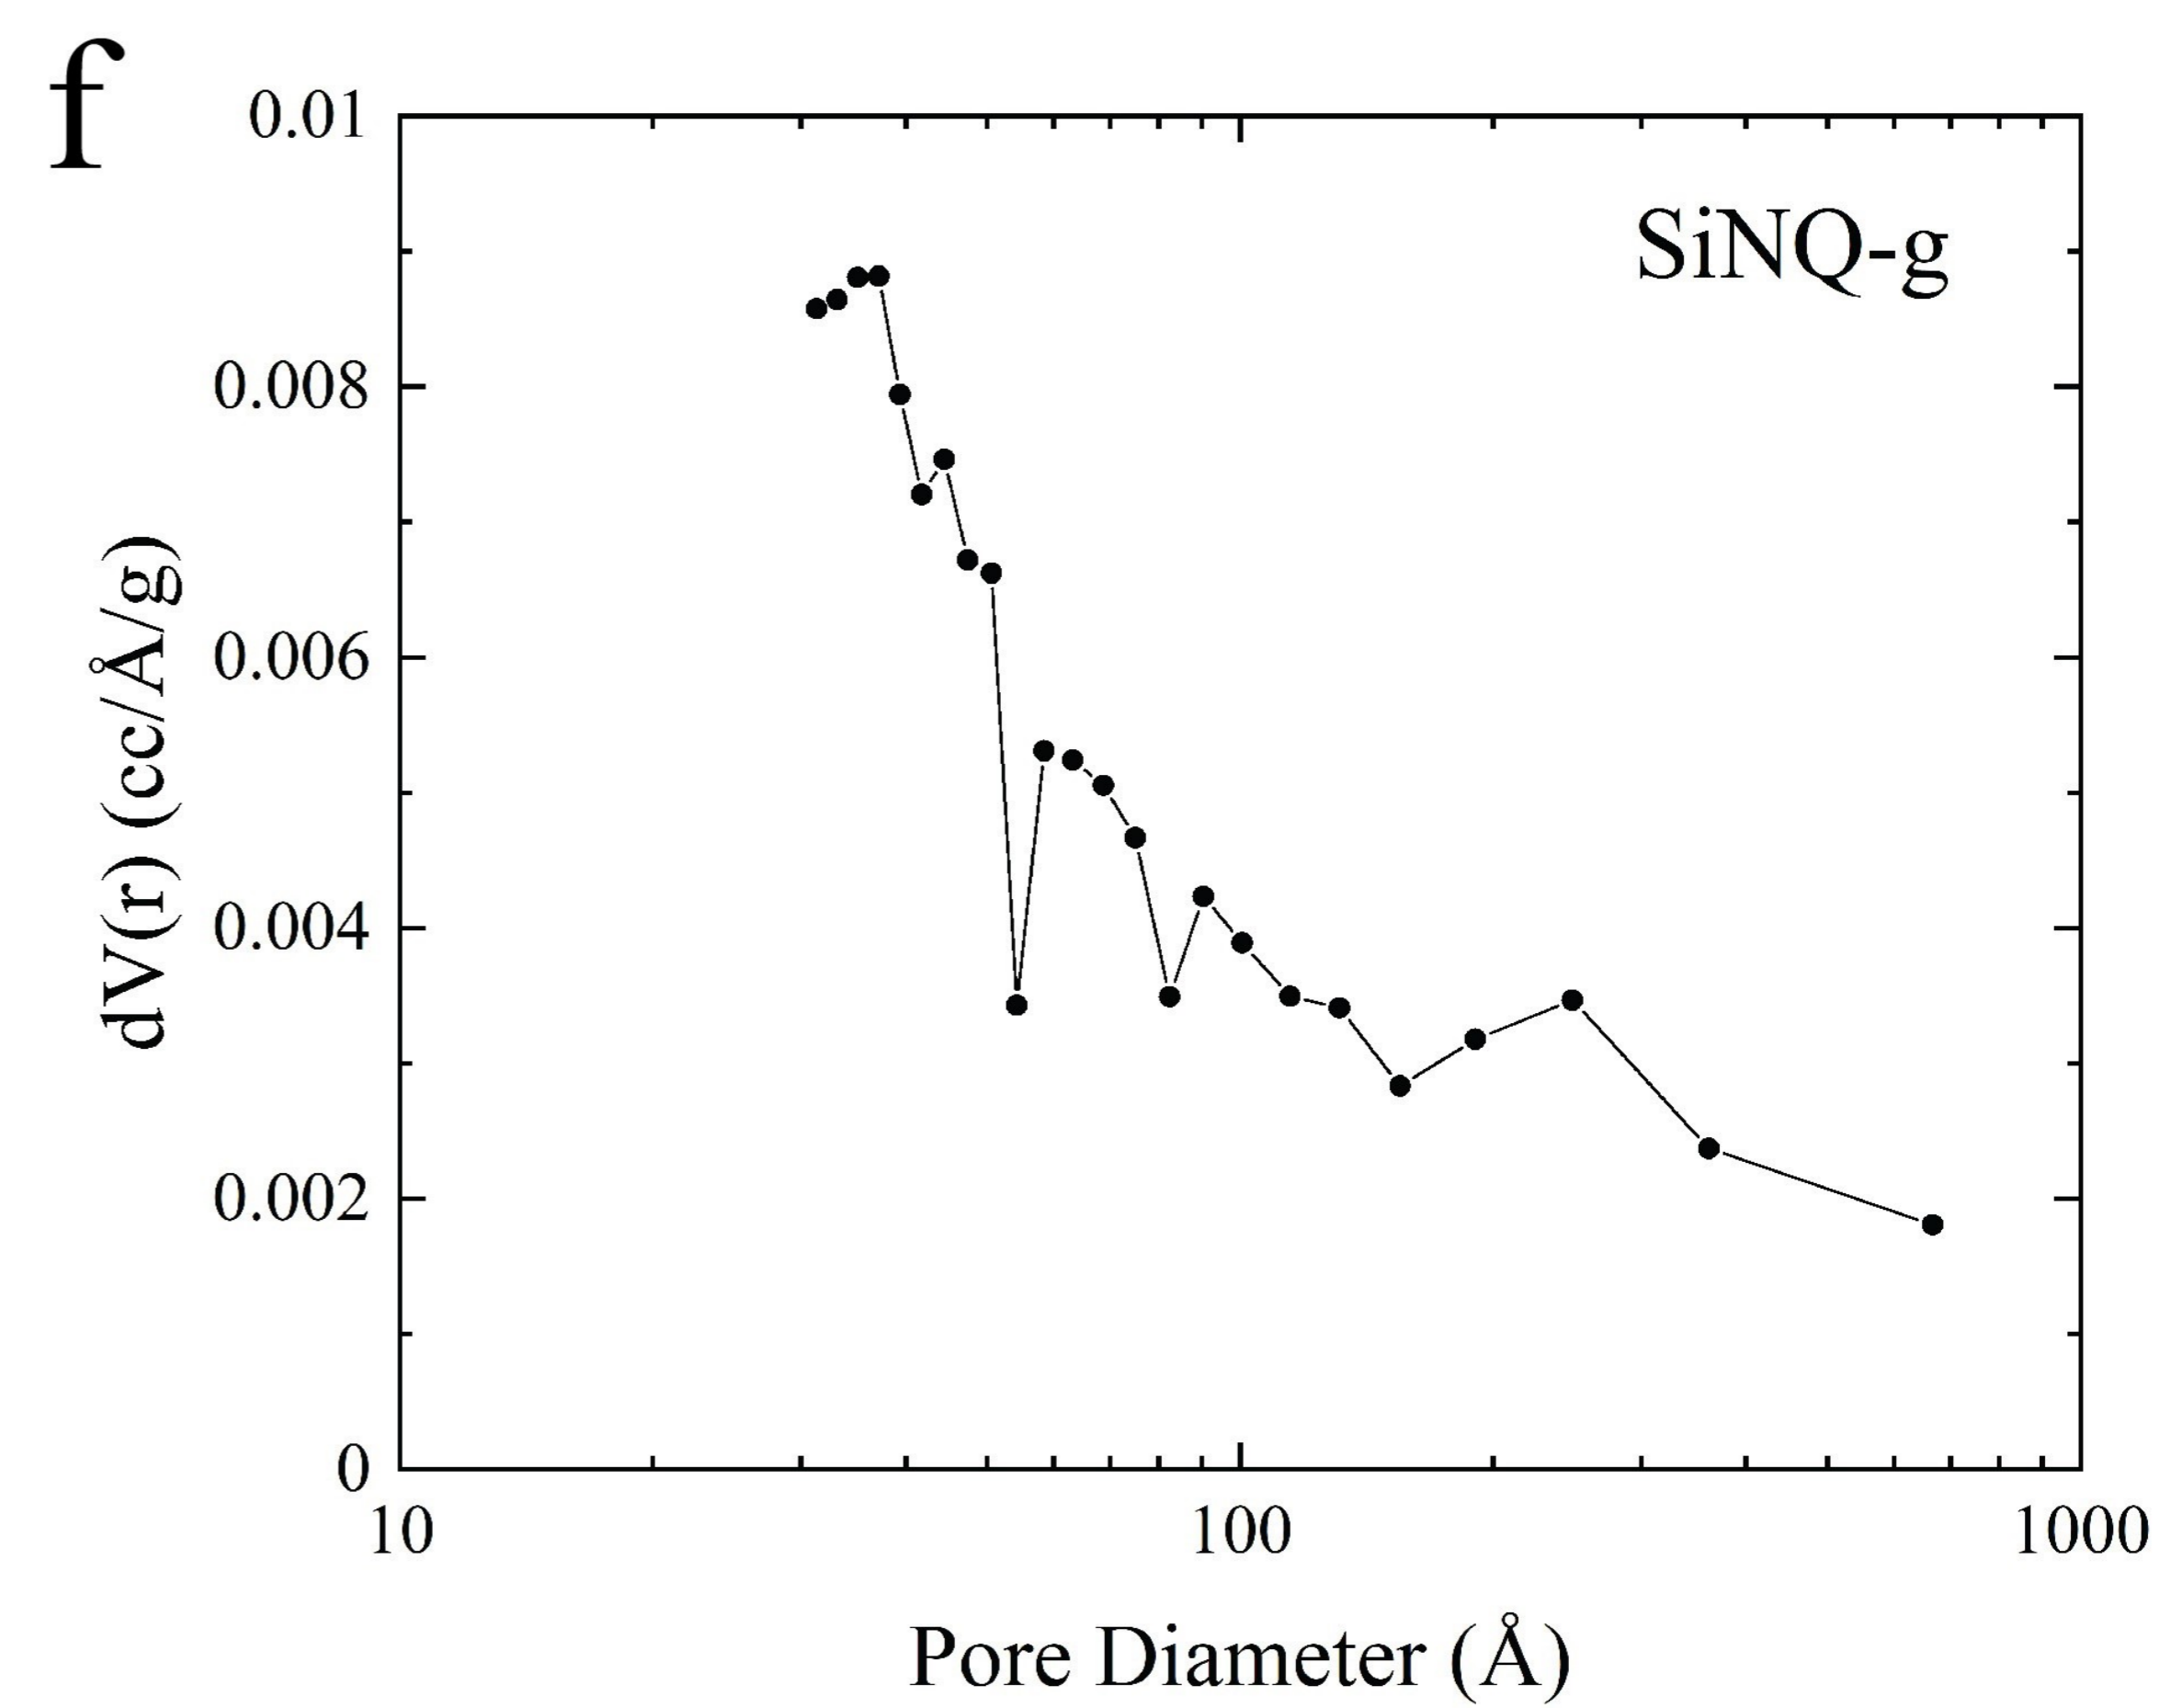

Supplement: d4gc00498a3.pdf [file d4gc00498a3.pdf]

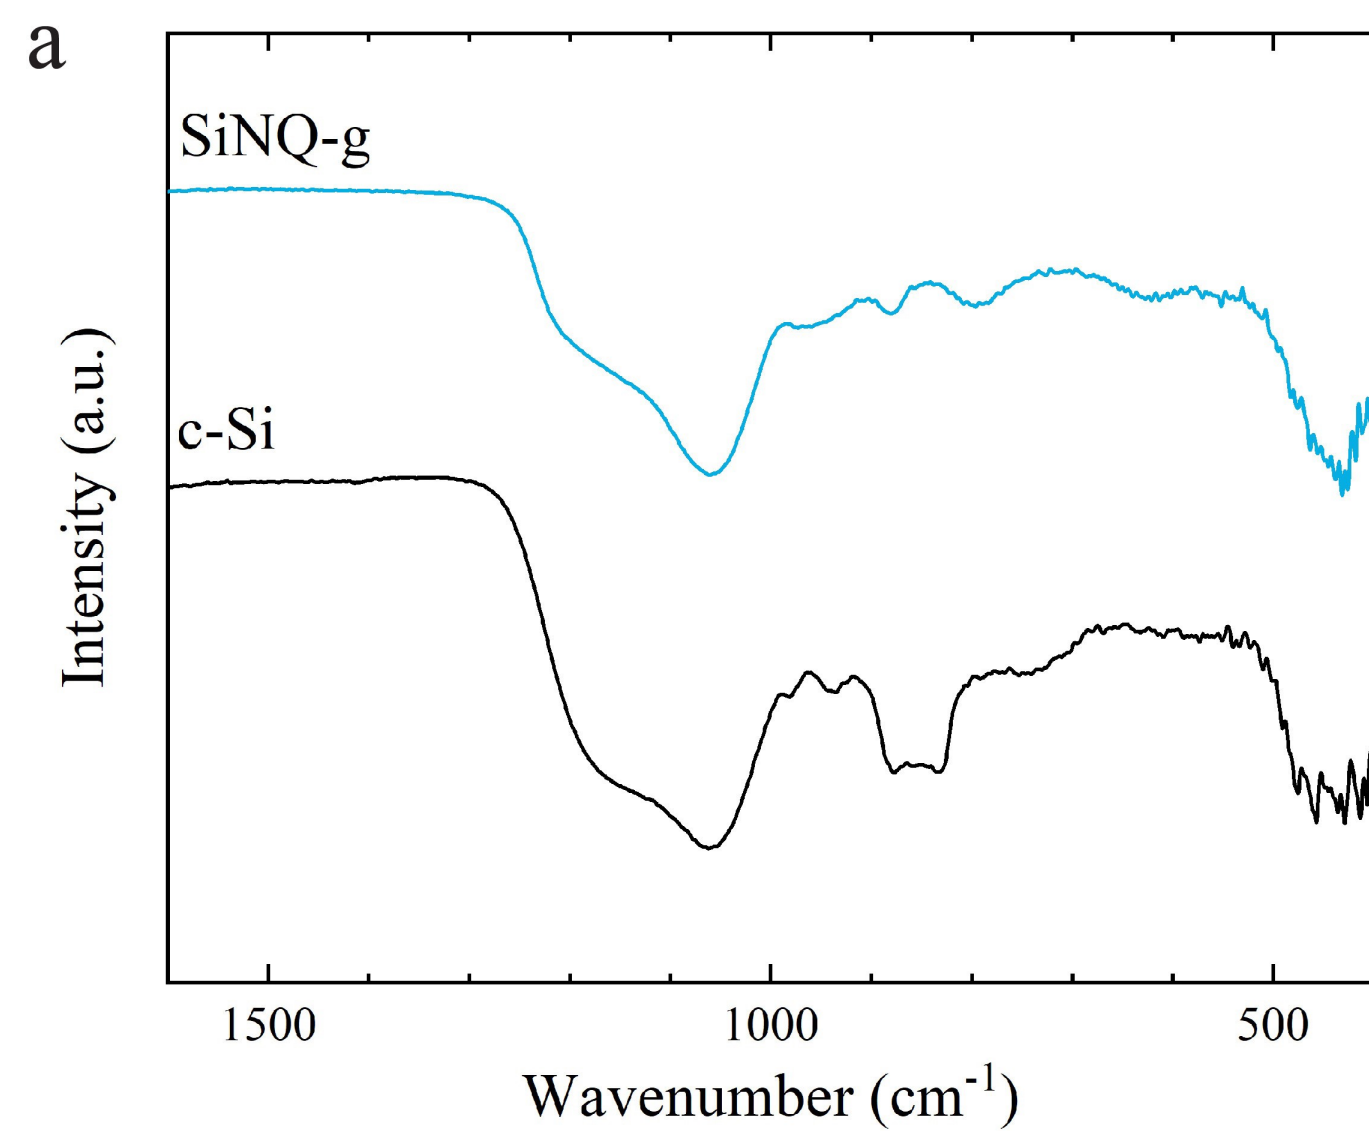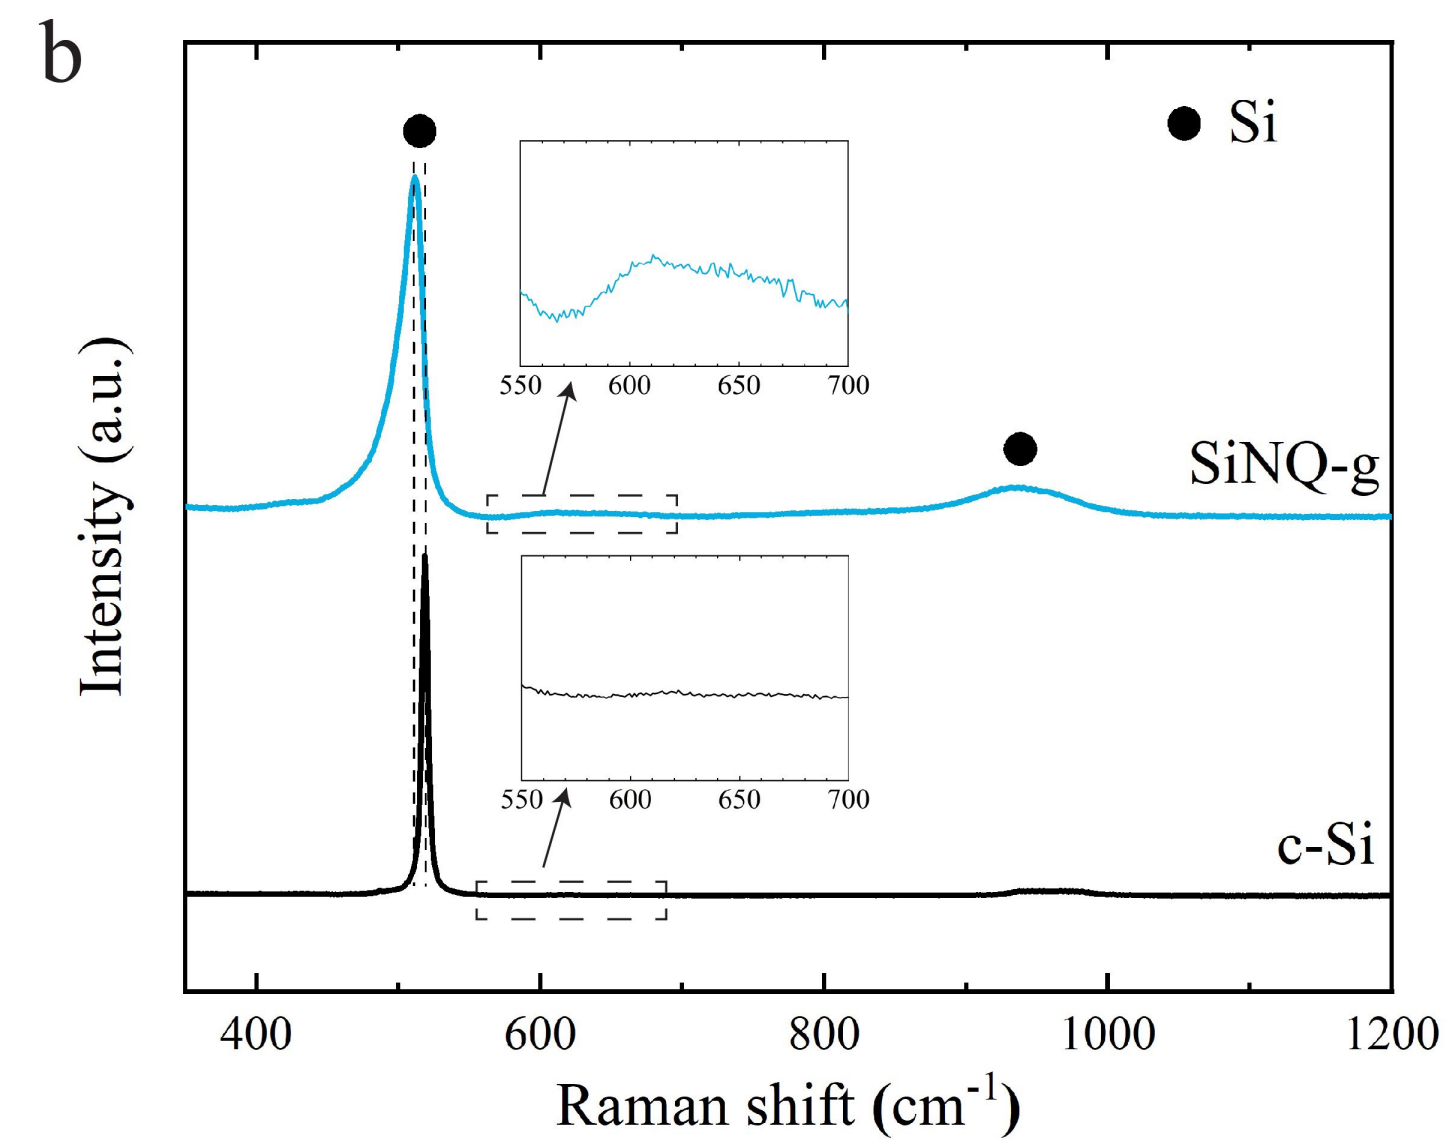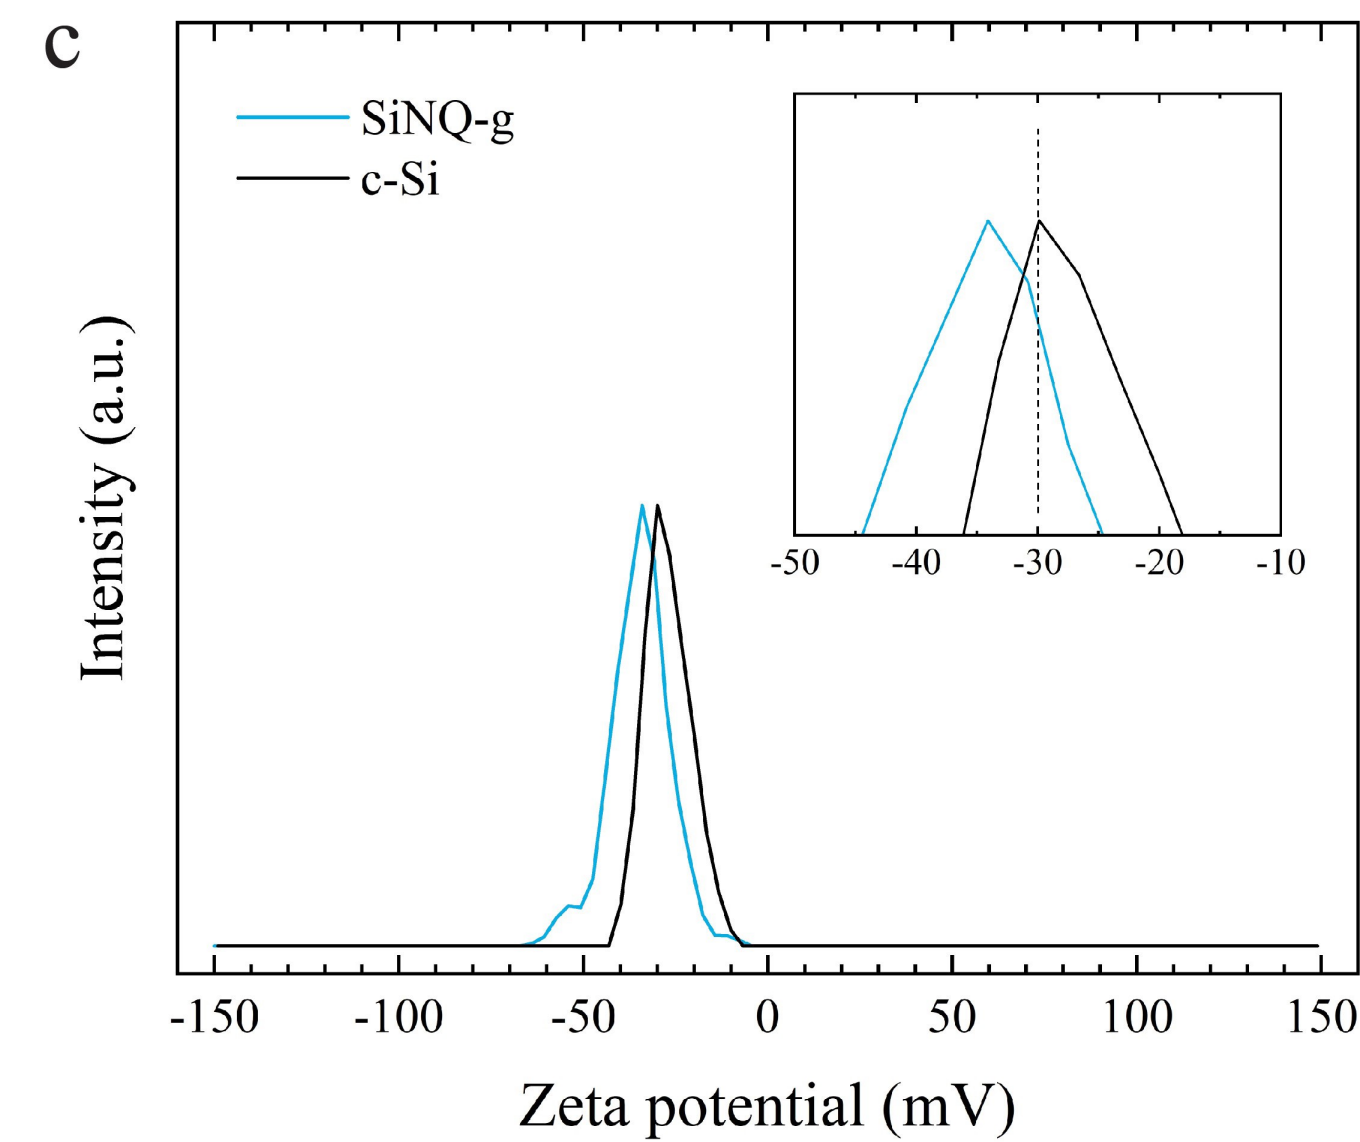

### Magnetic stirring

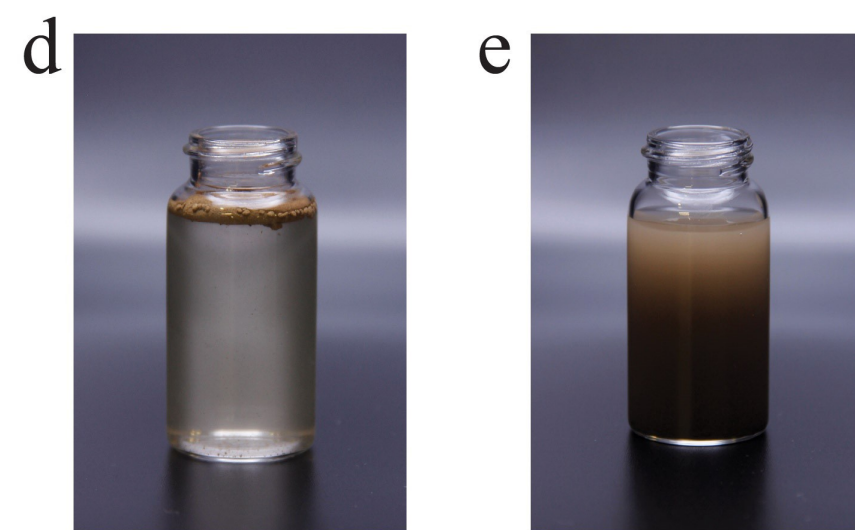

### Probe sonication

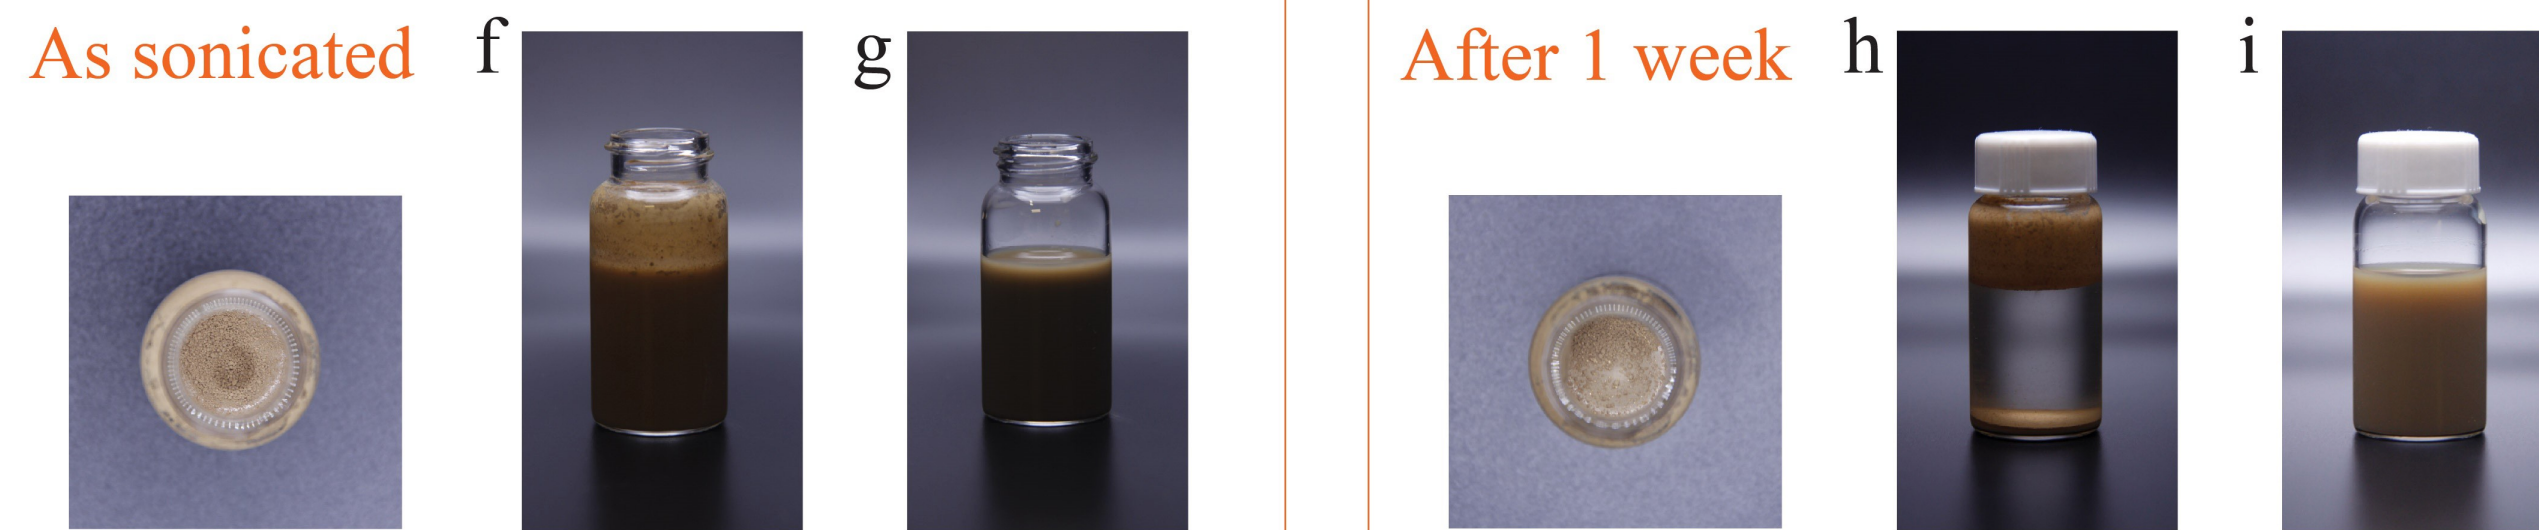

Supplement: d4gc00498a4.pdf [file d4gc00498a4.pdf]

# SilicaNQ

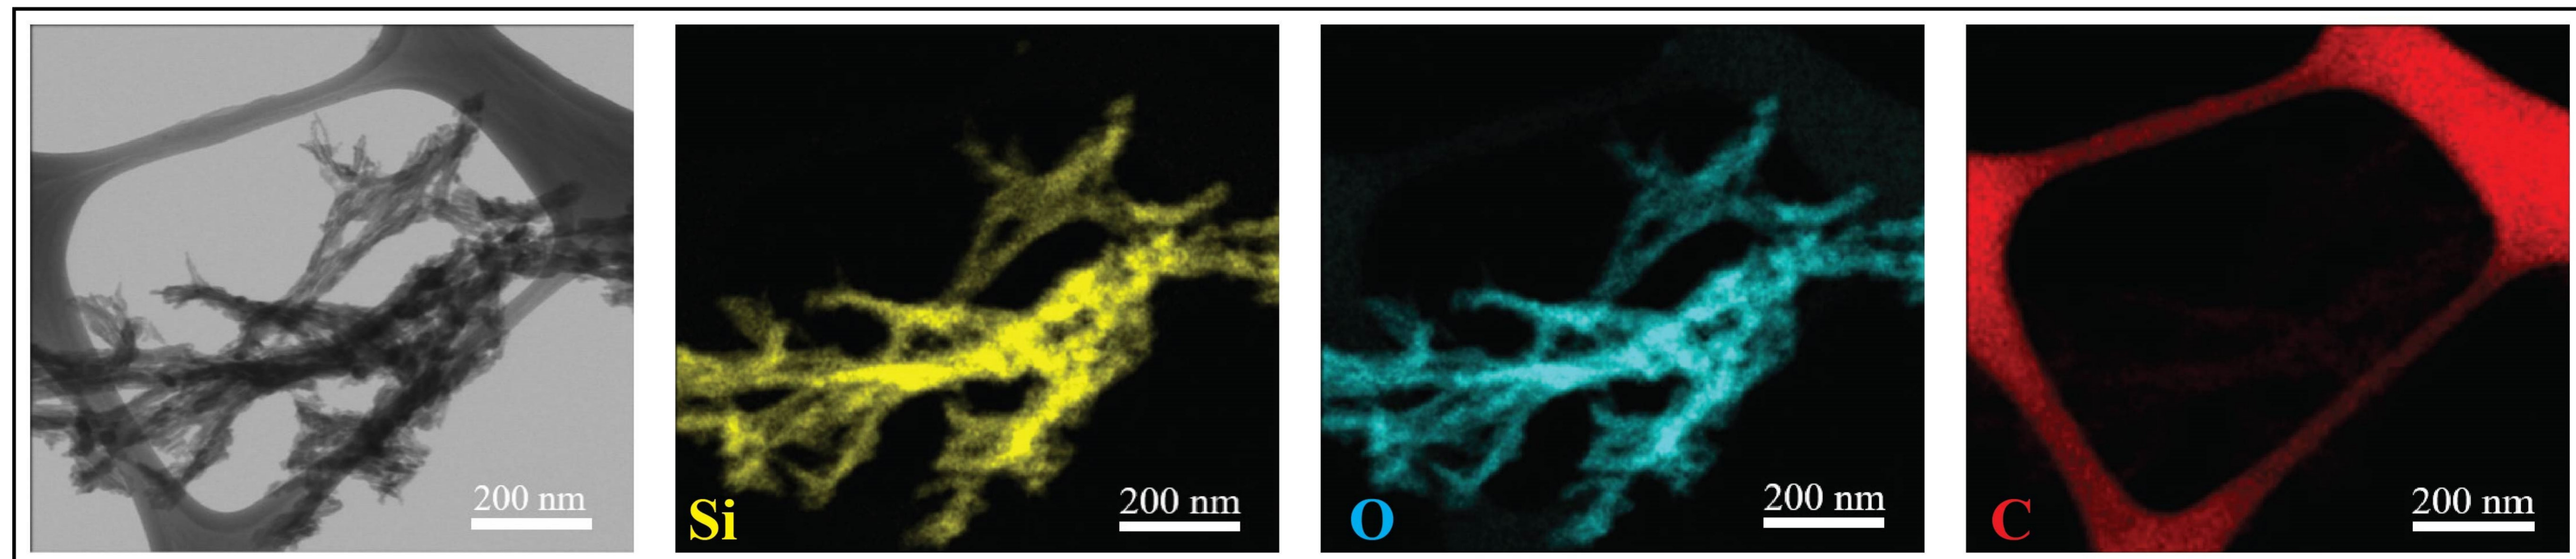

# SiNQ-a

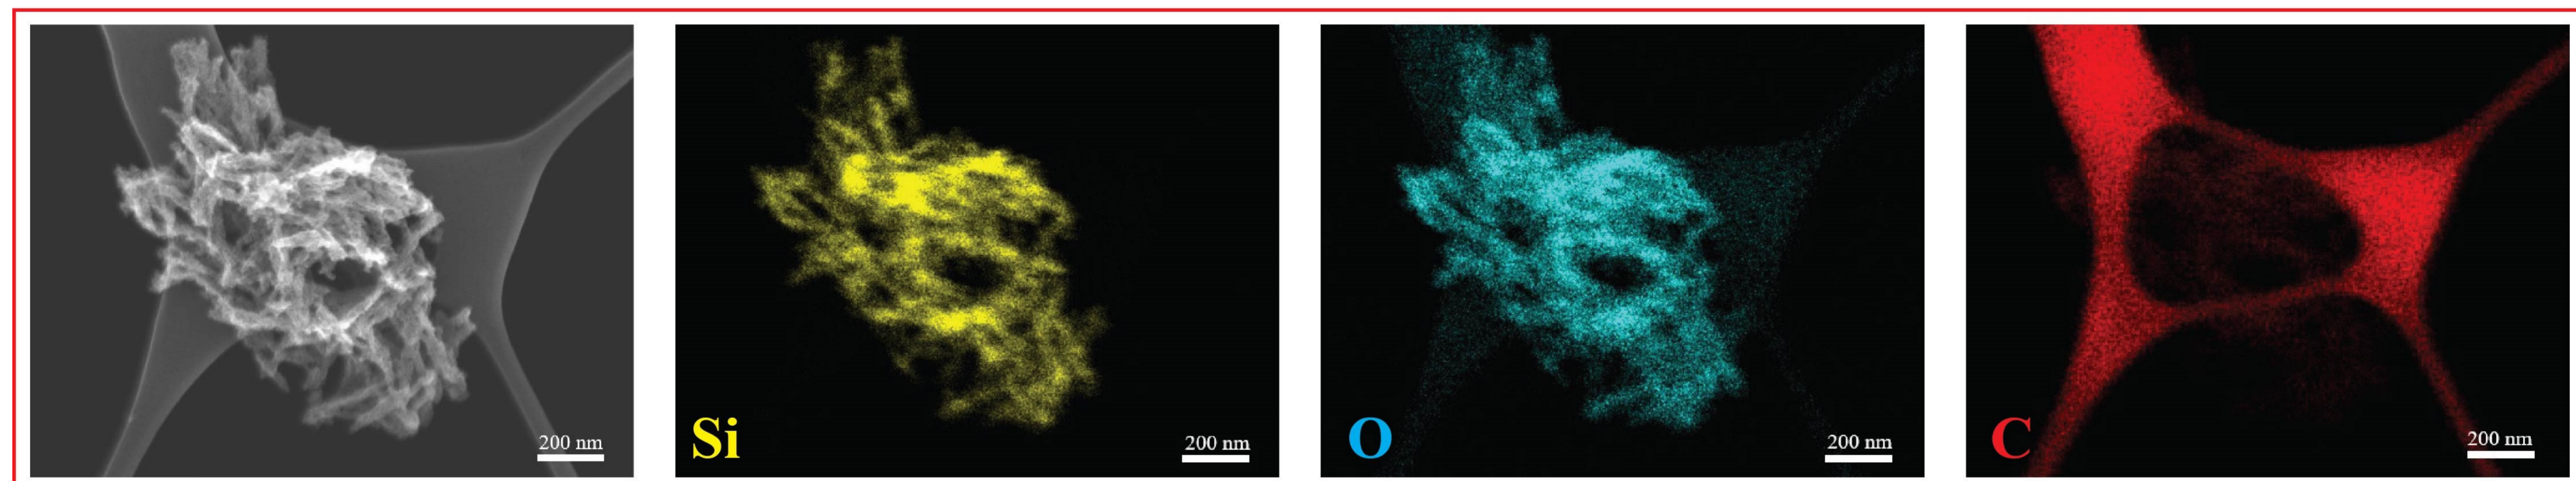

# SiNQ-g

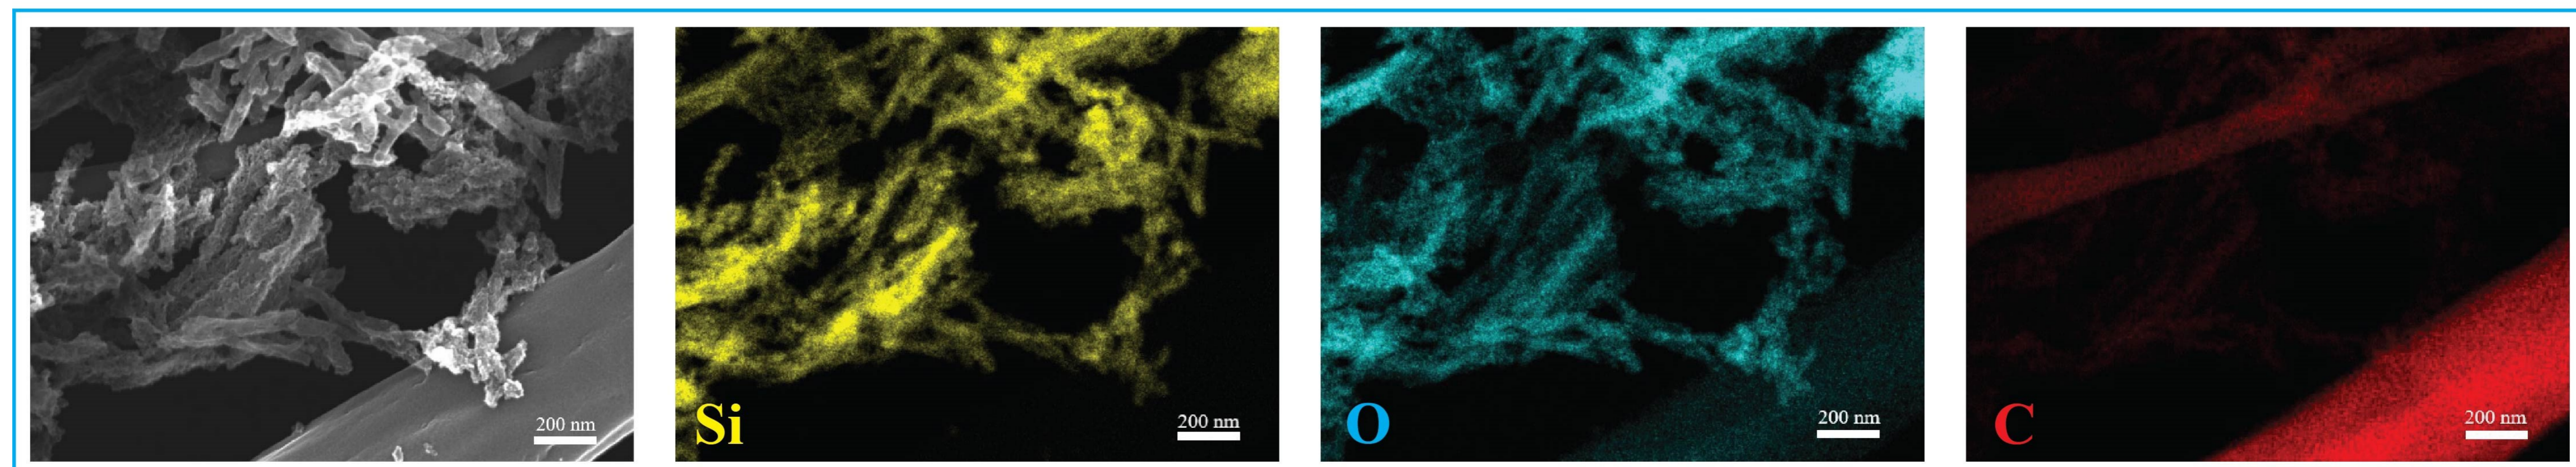

Supplement: d4gc00498a5.pdf [file d4gc00498a5.pdf]

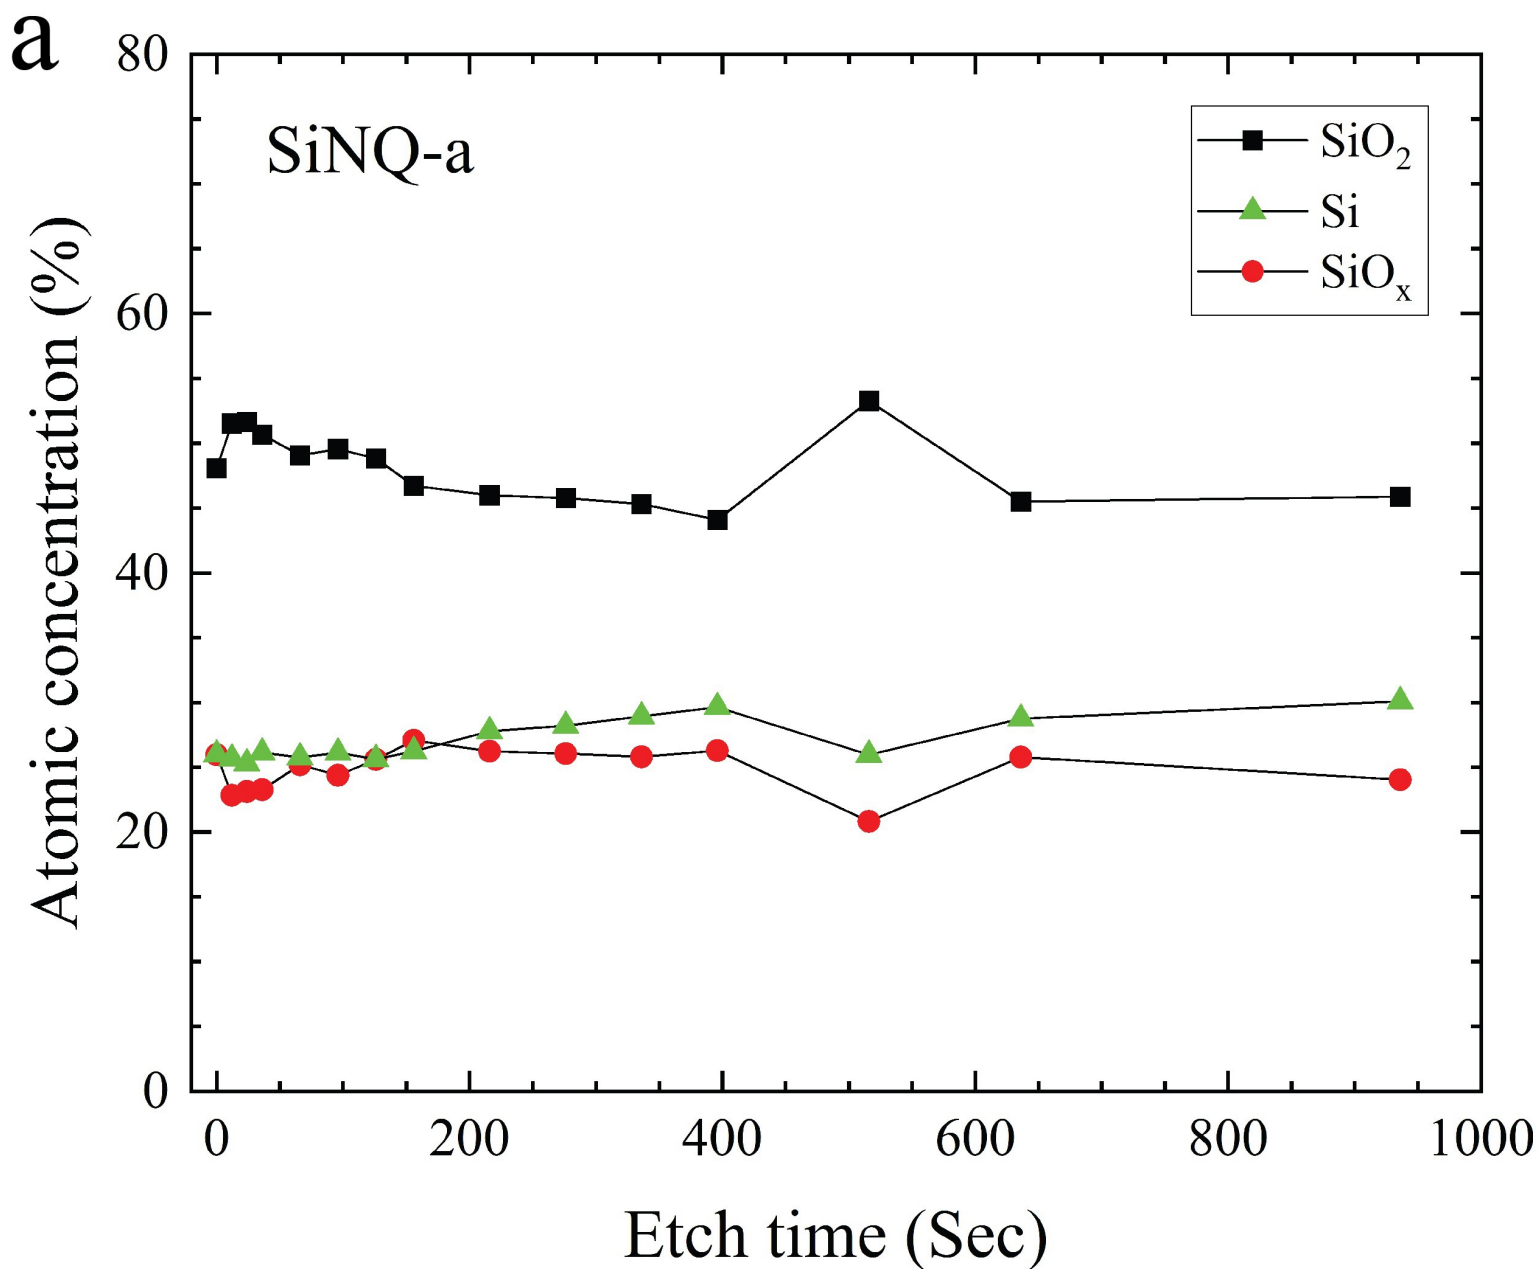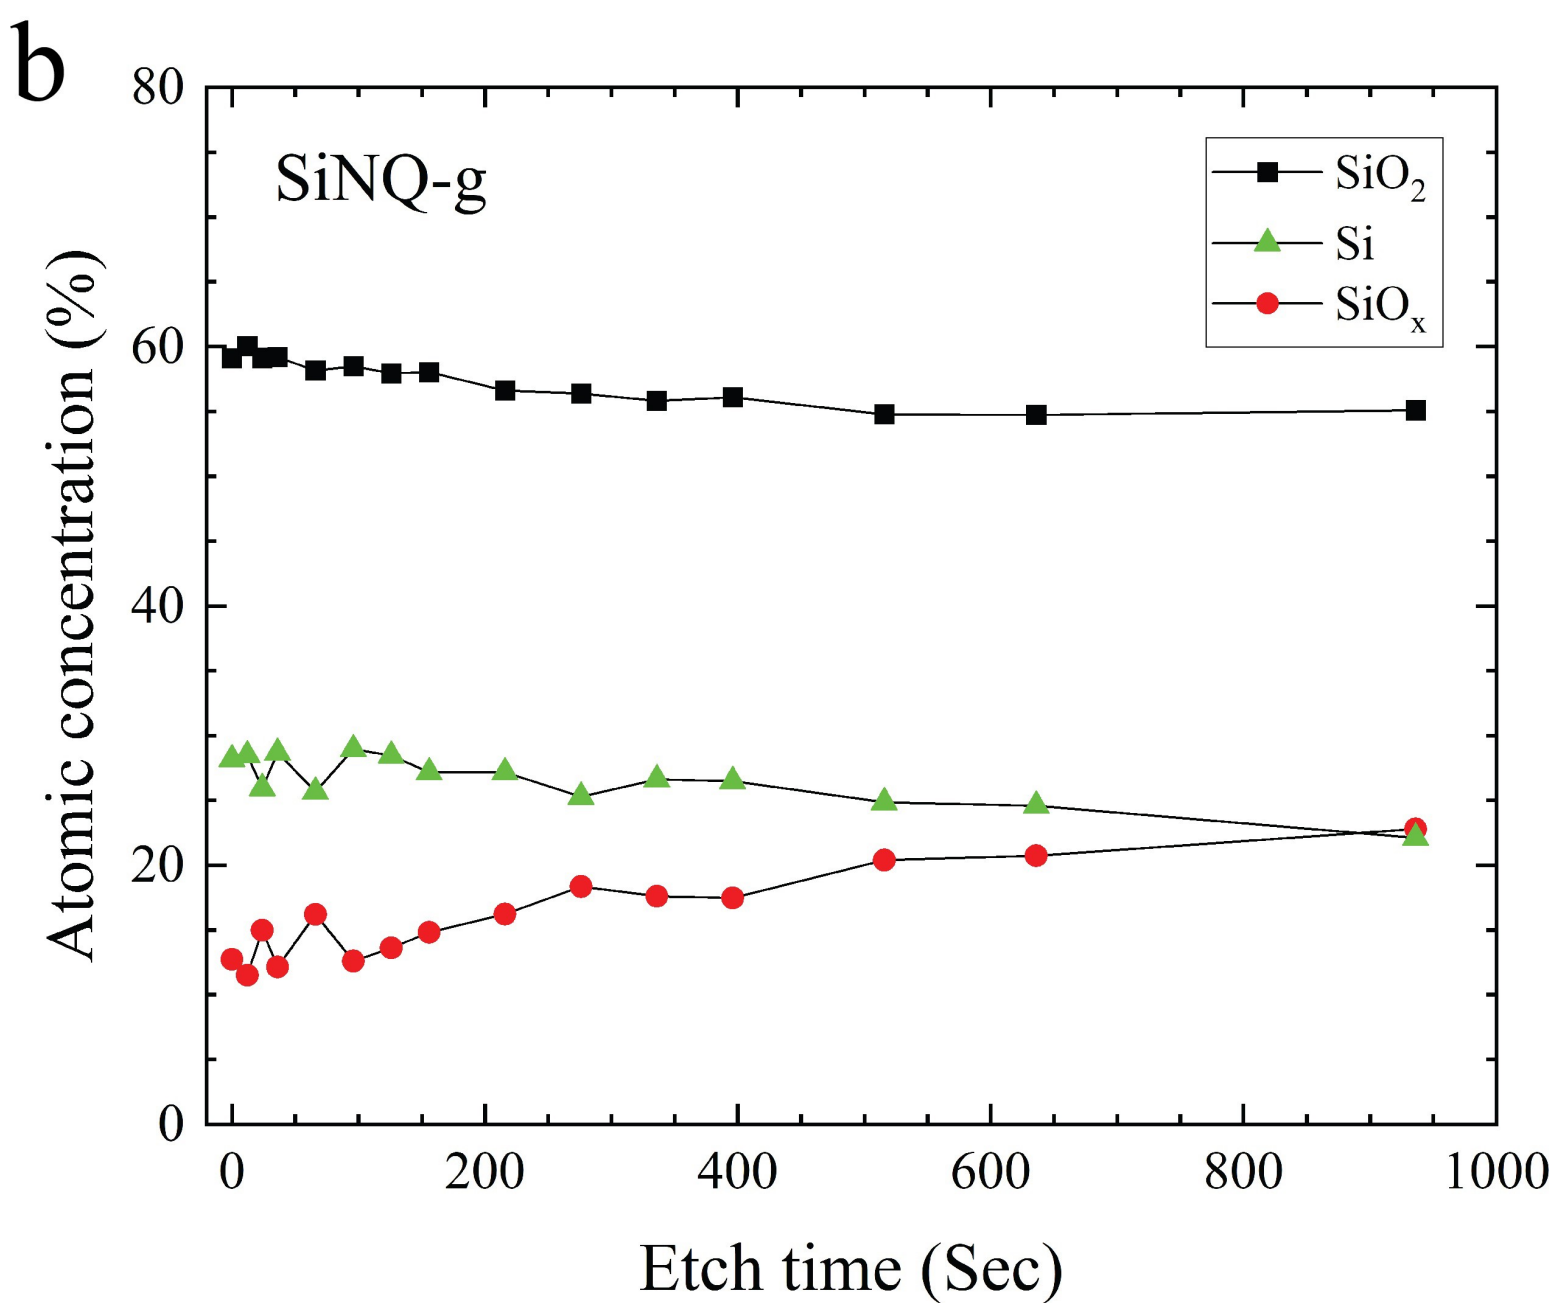

Supplement: d4gc00498a6.pdf [file d4gc00498a6.pdf]

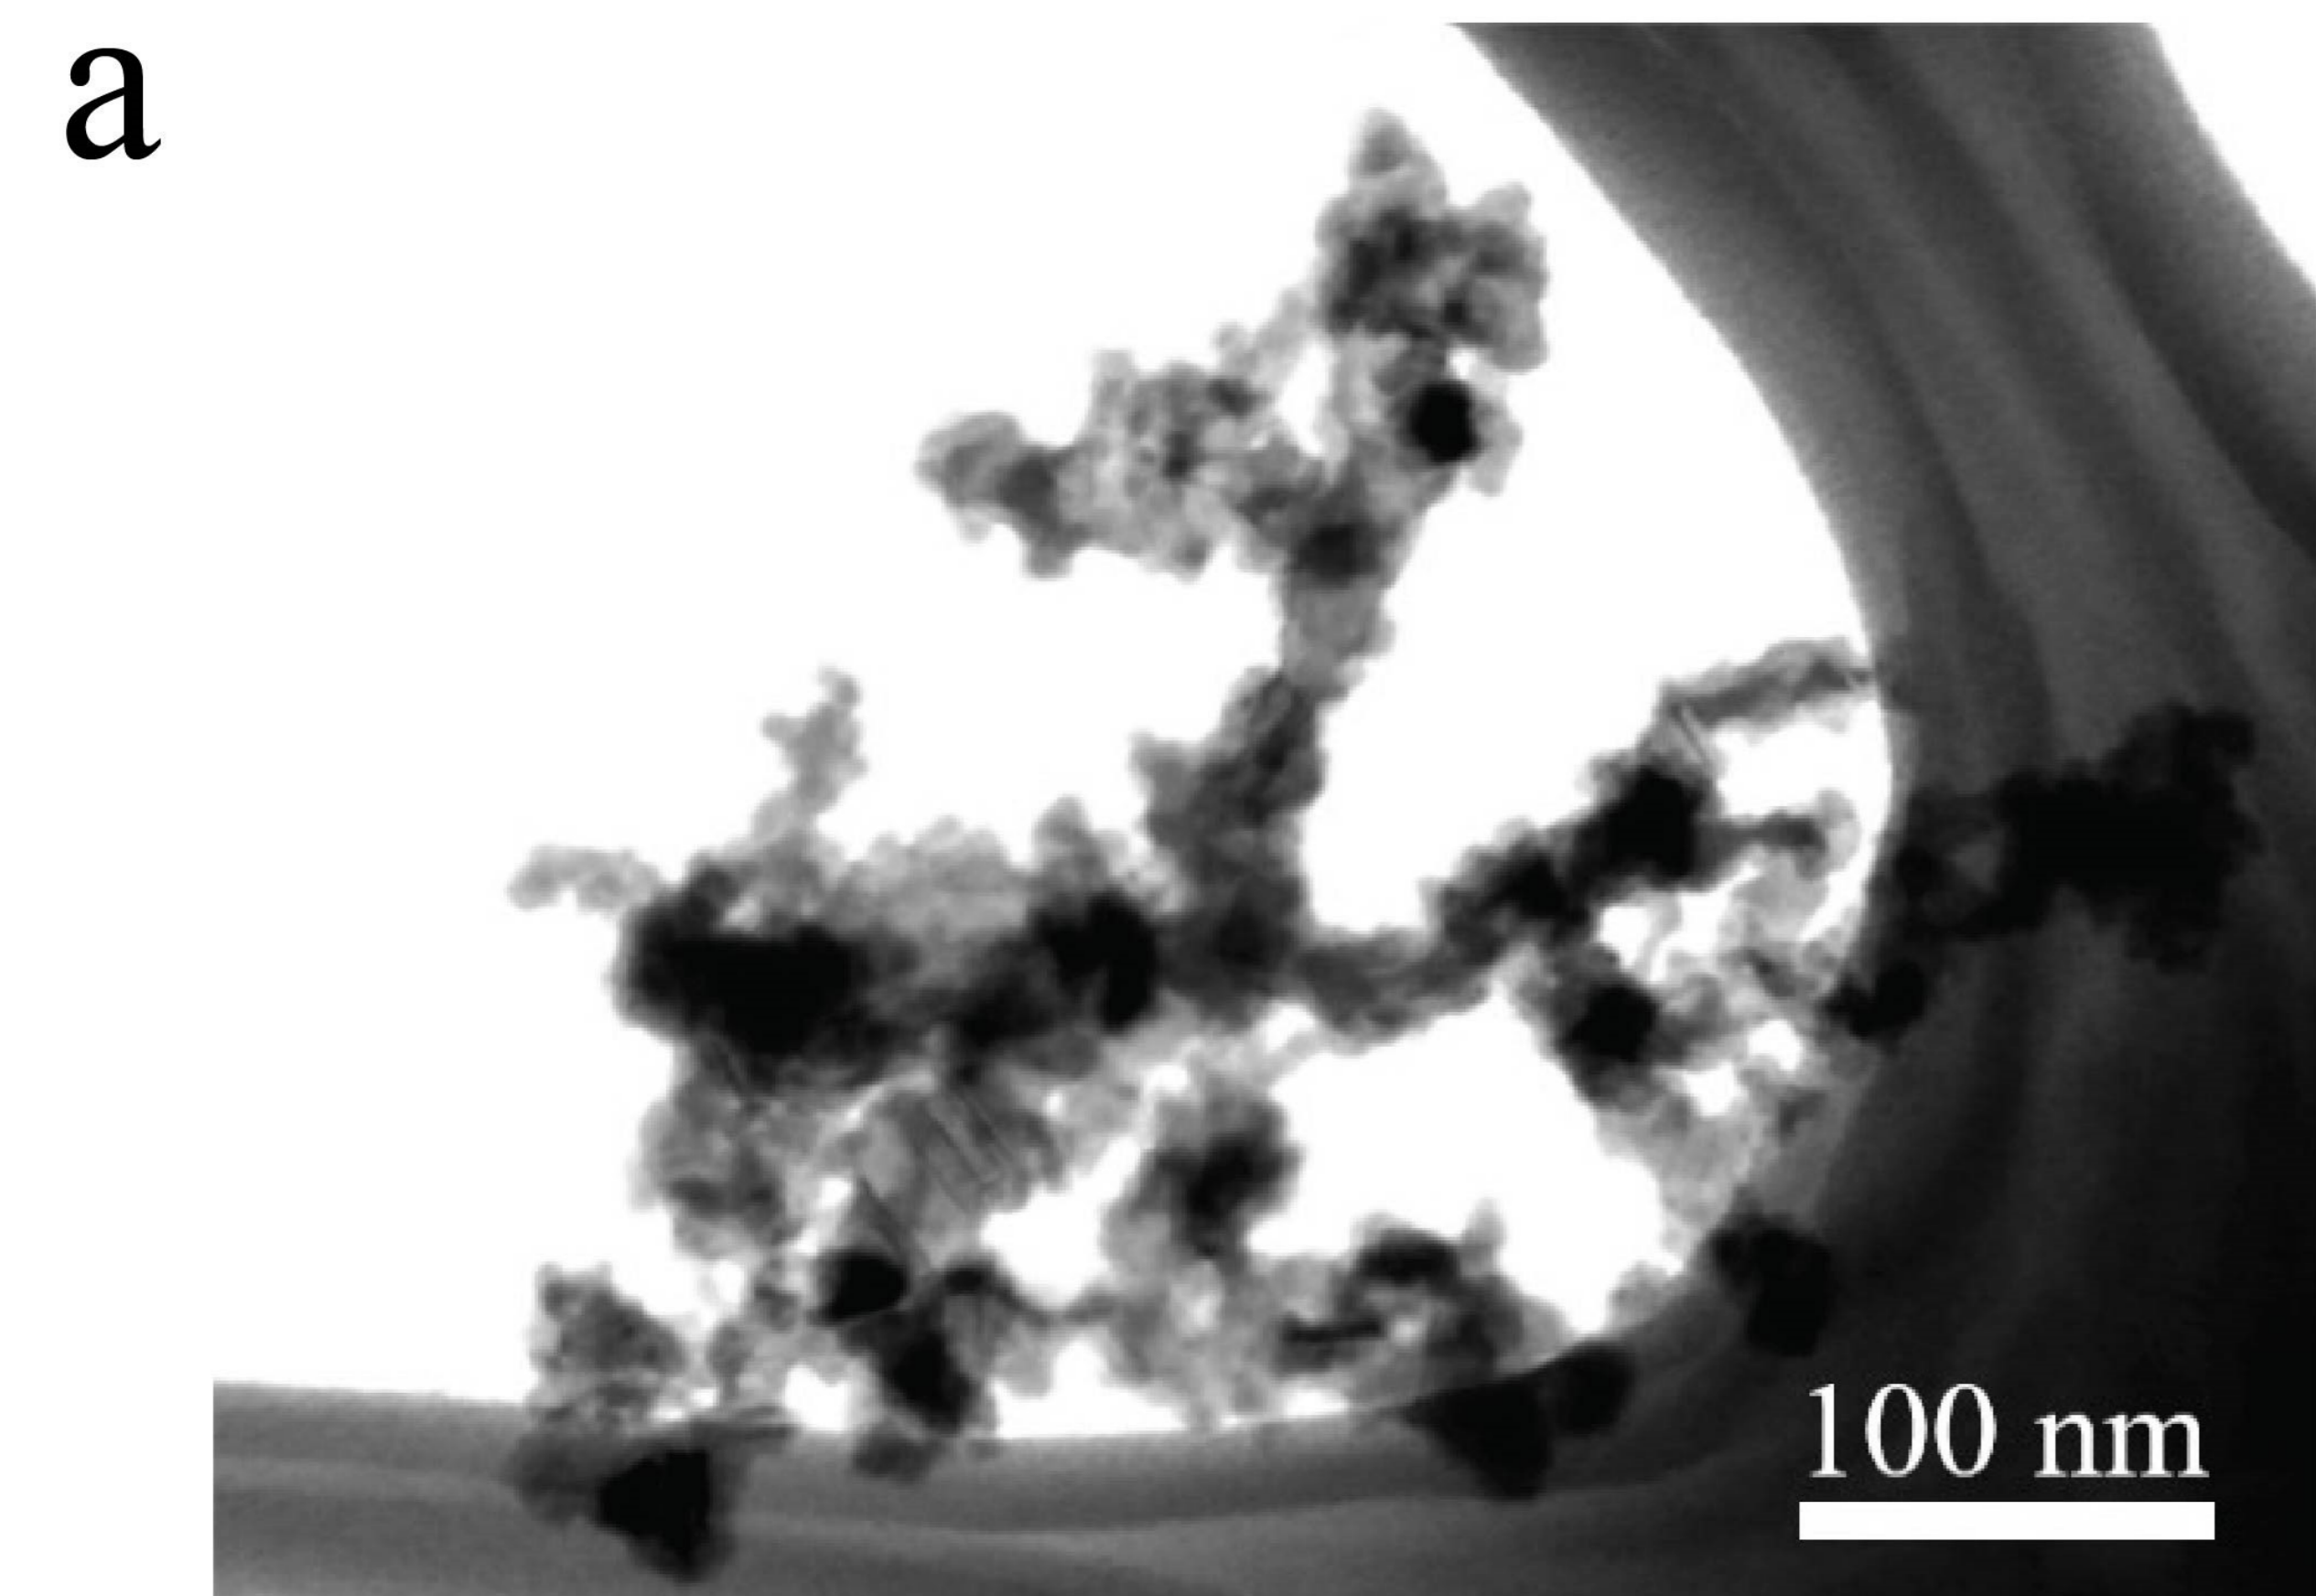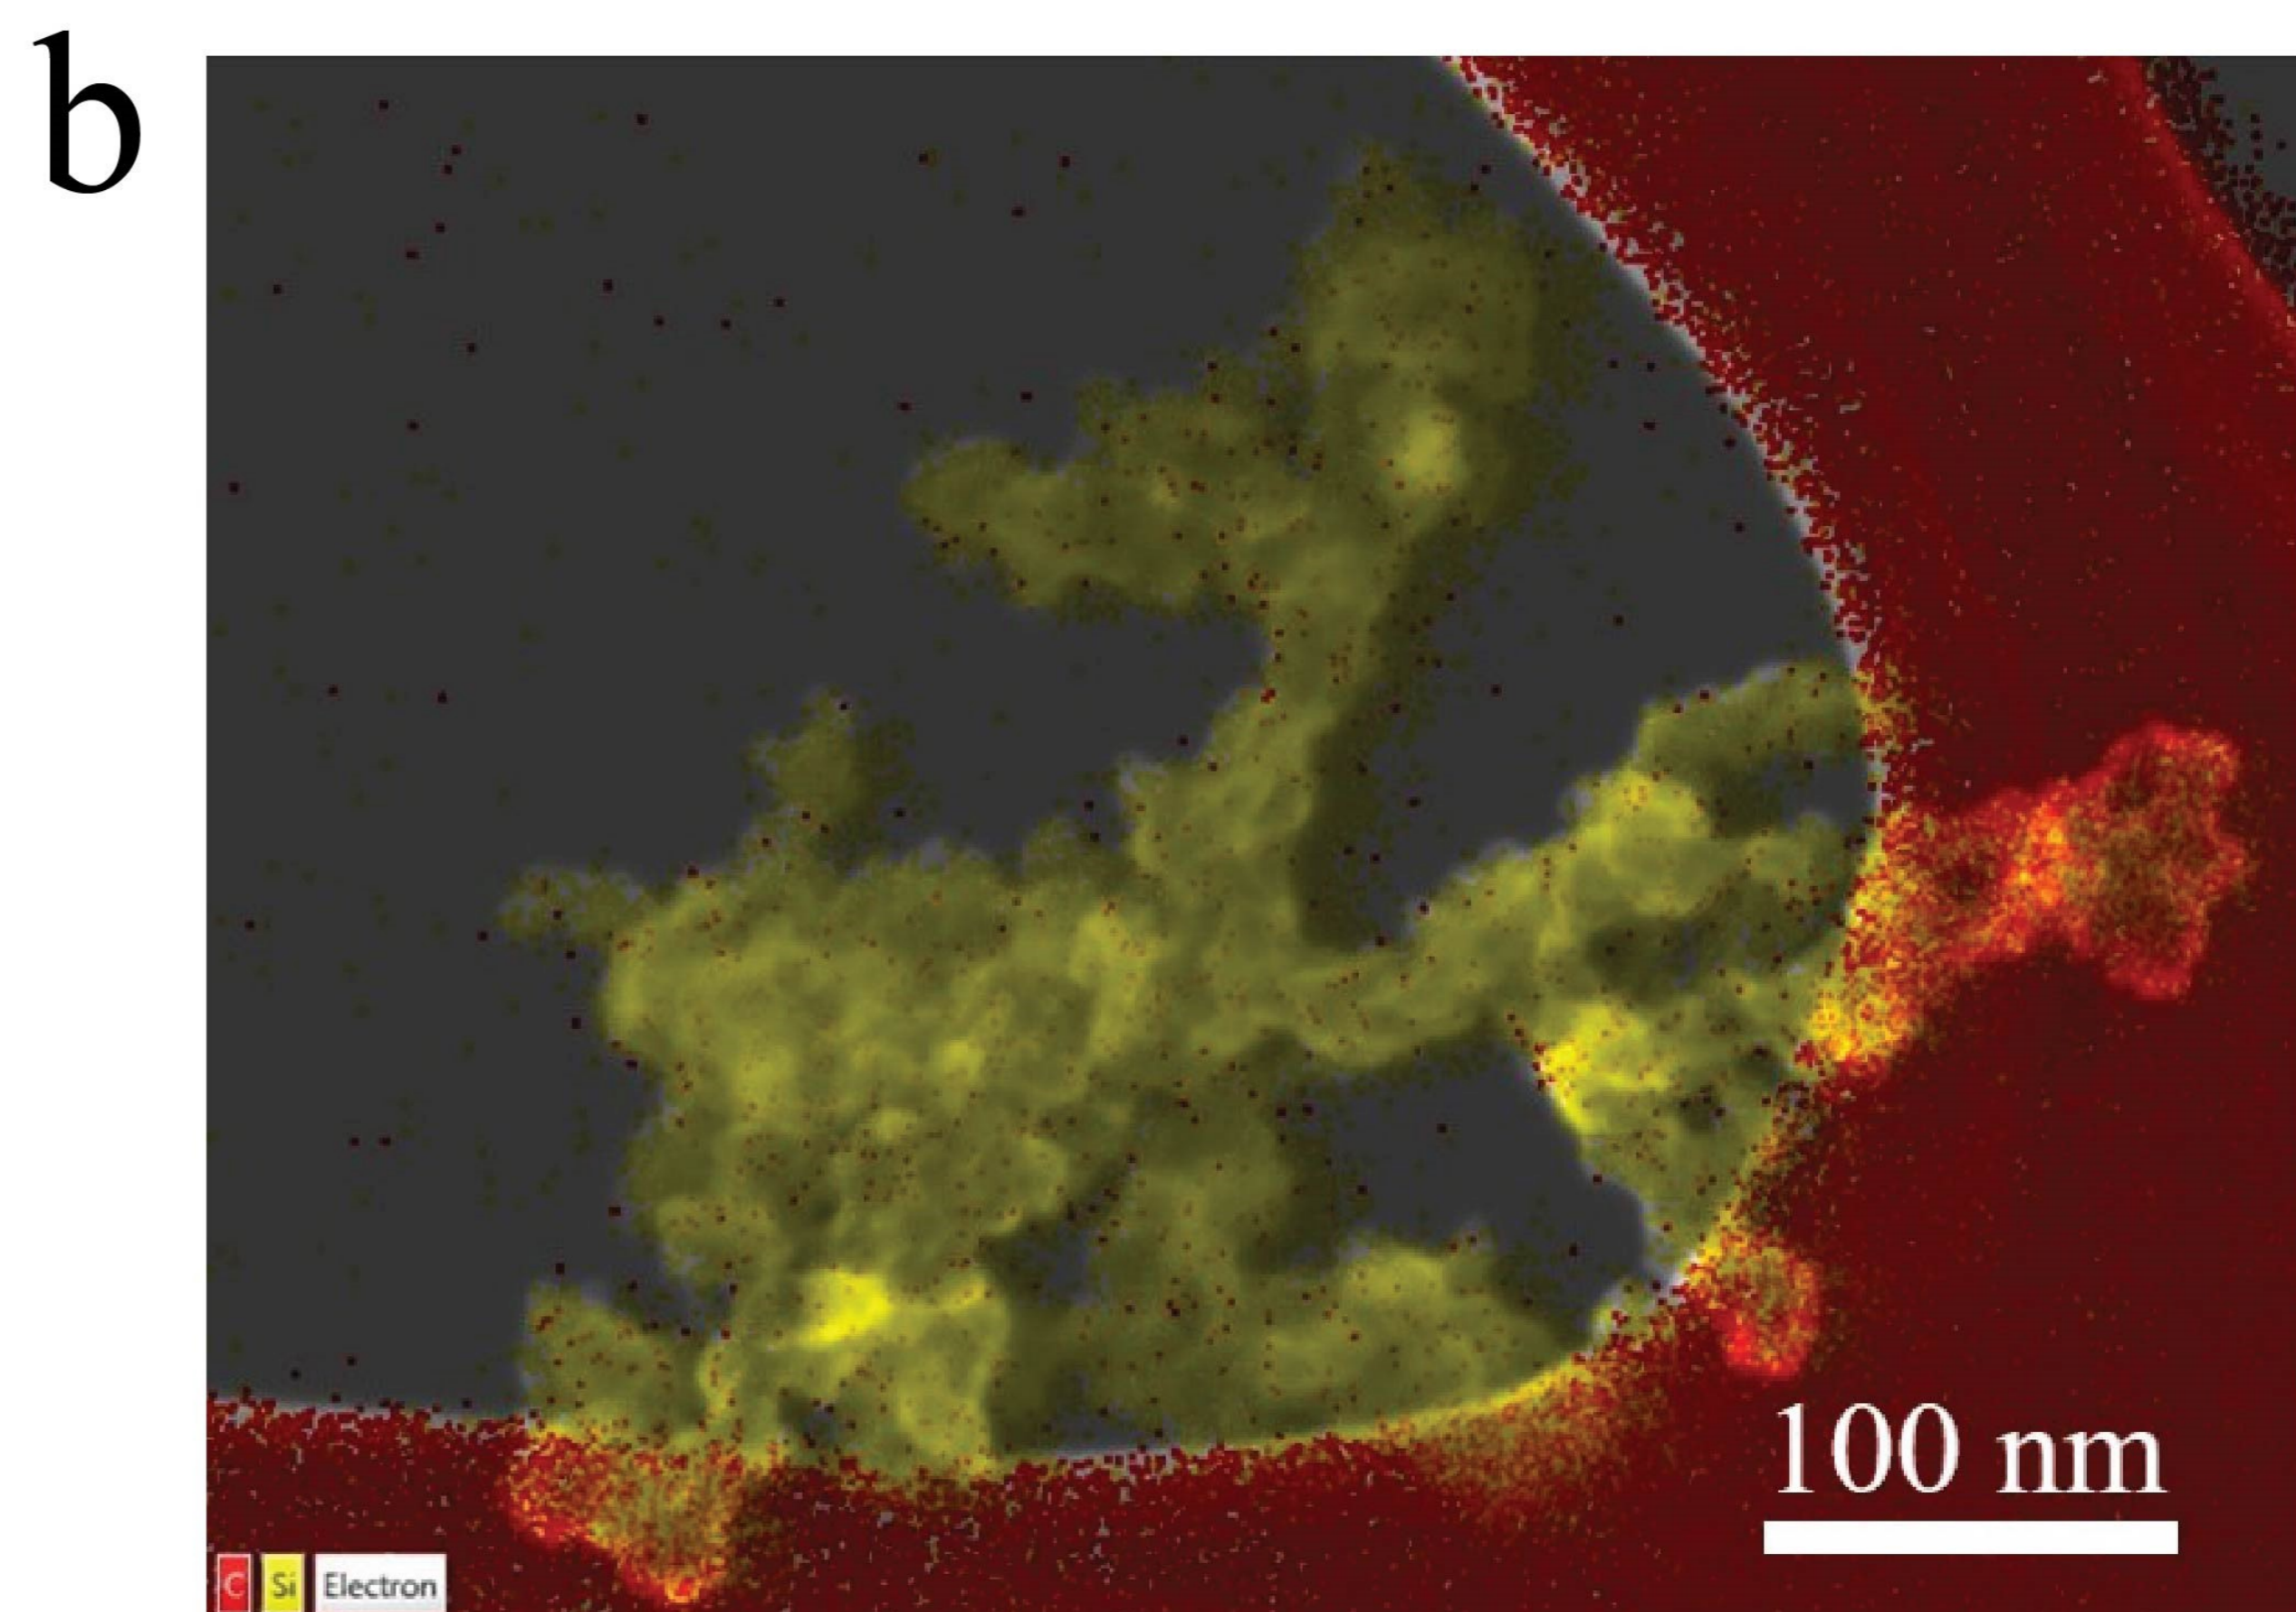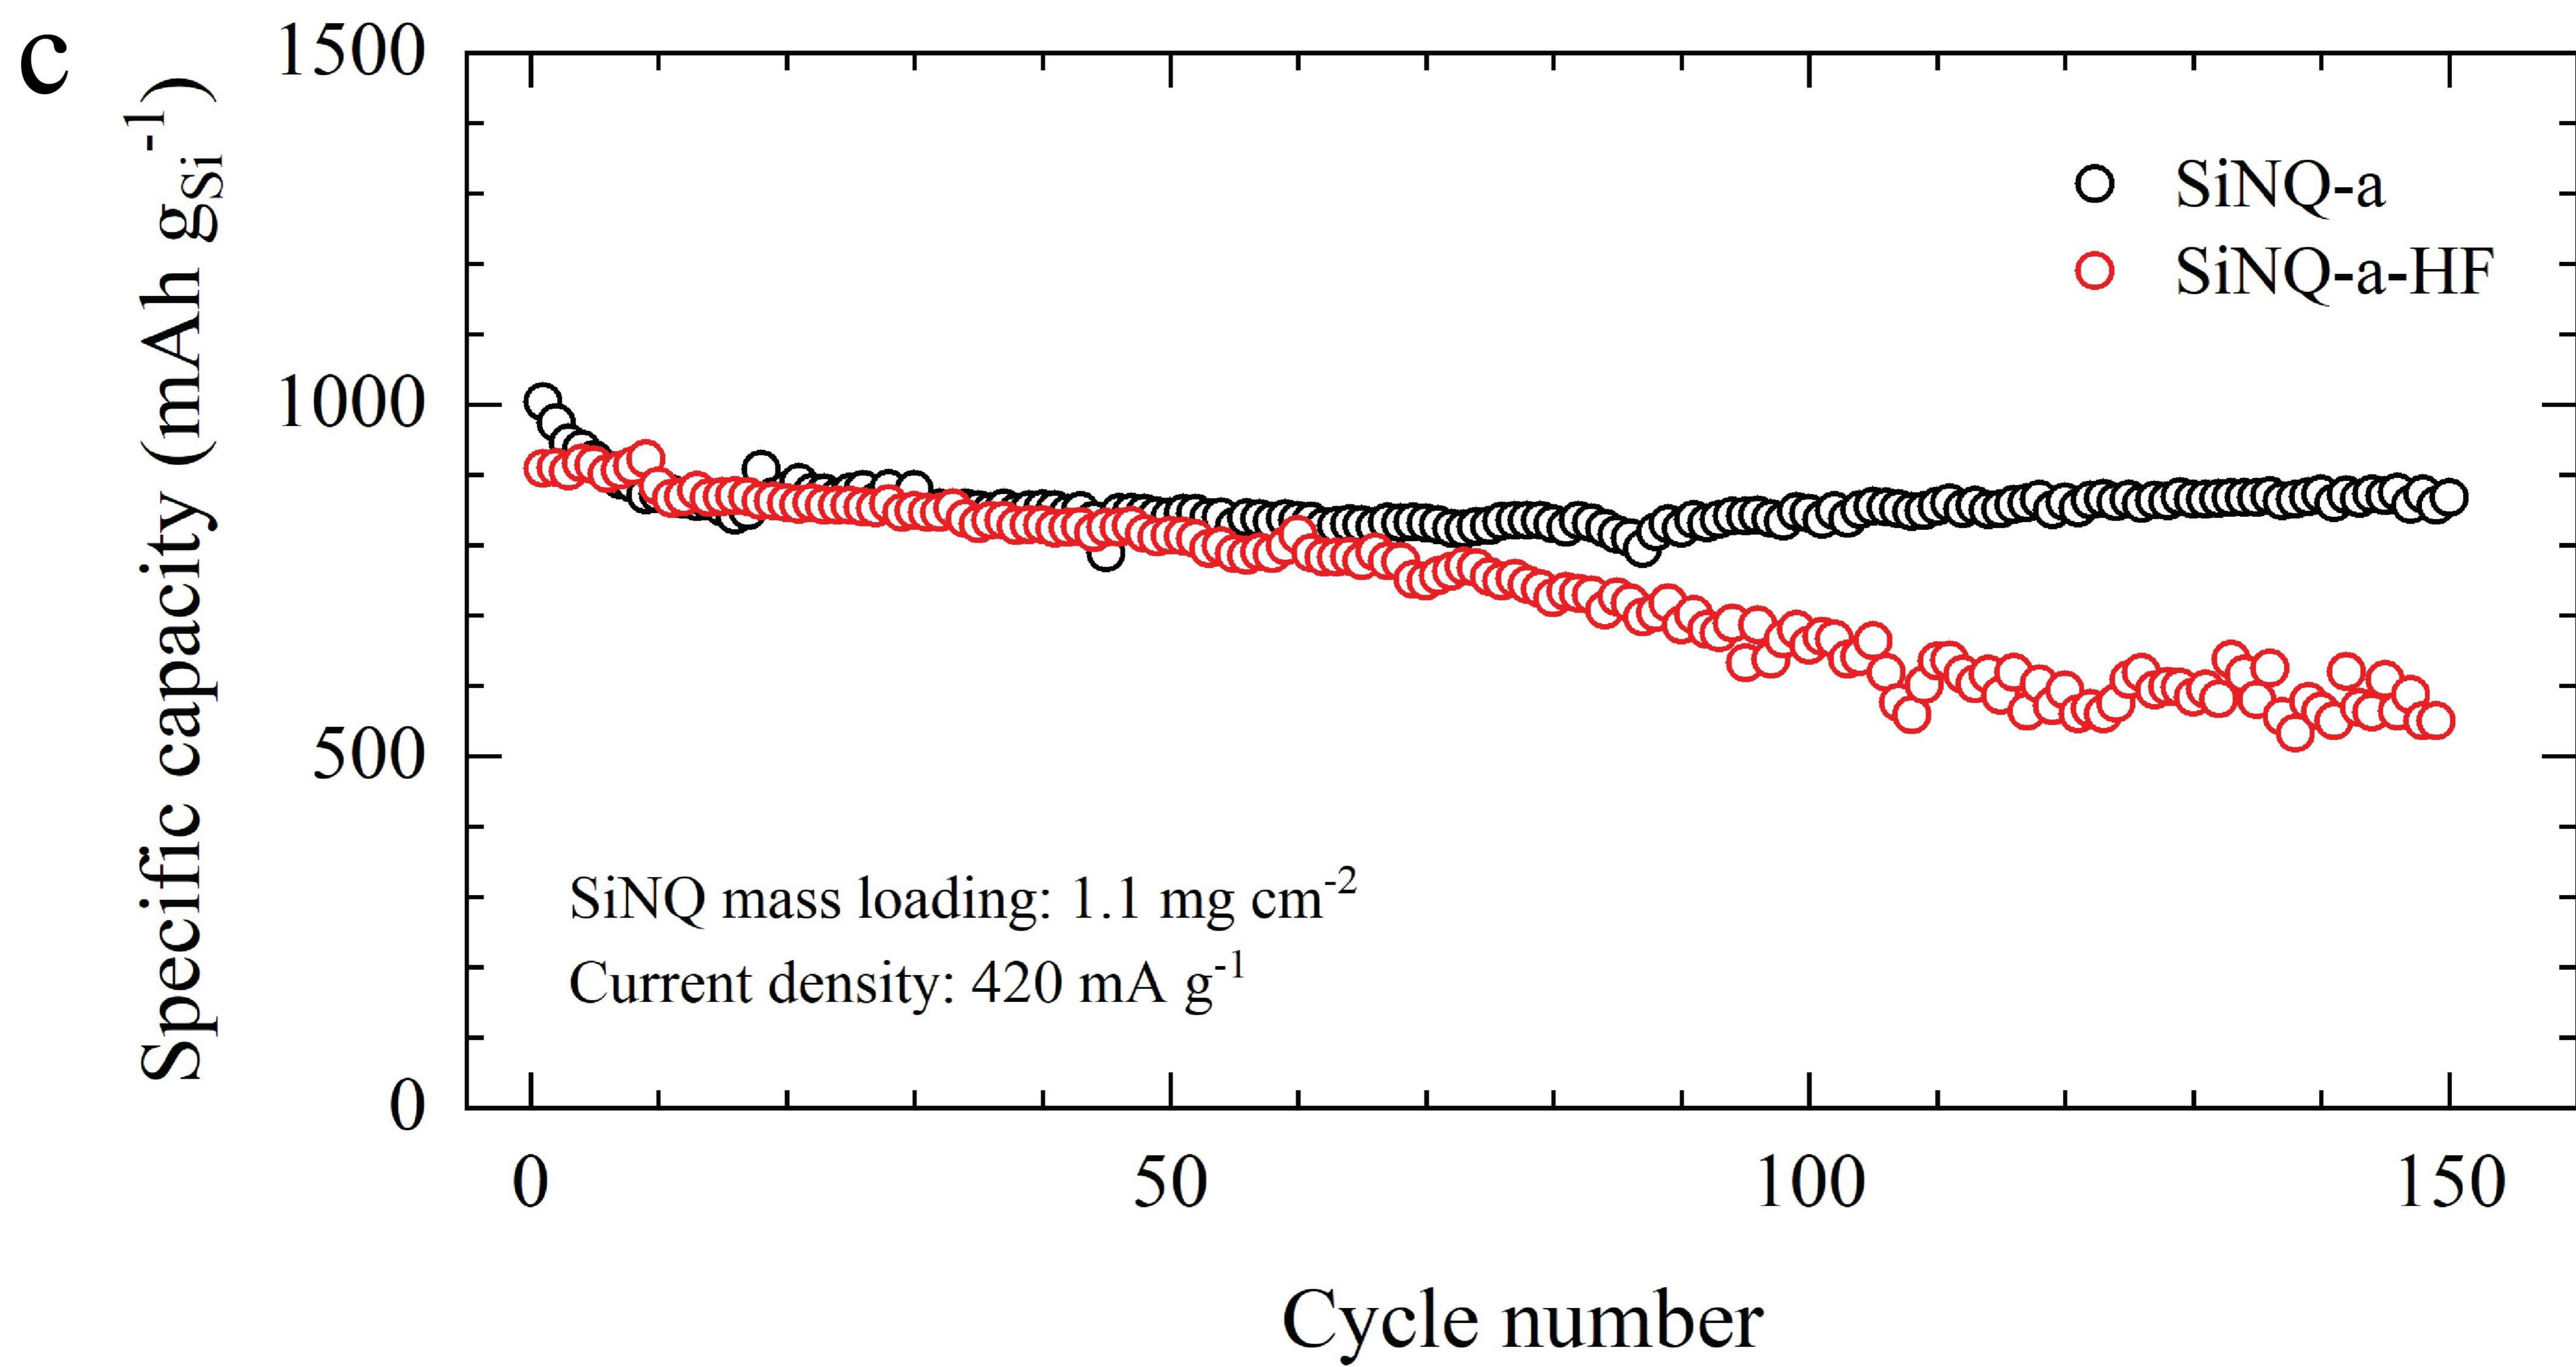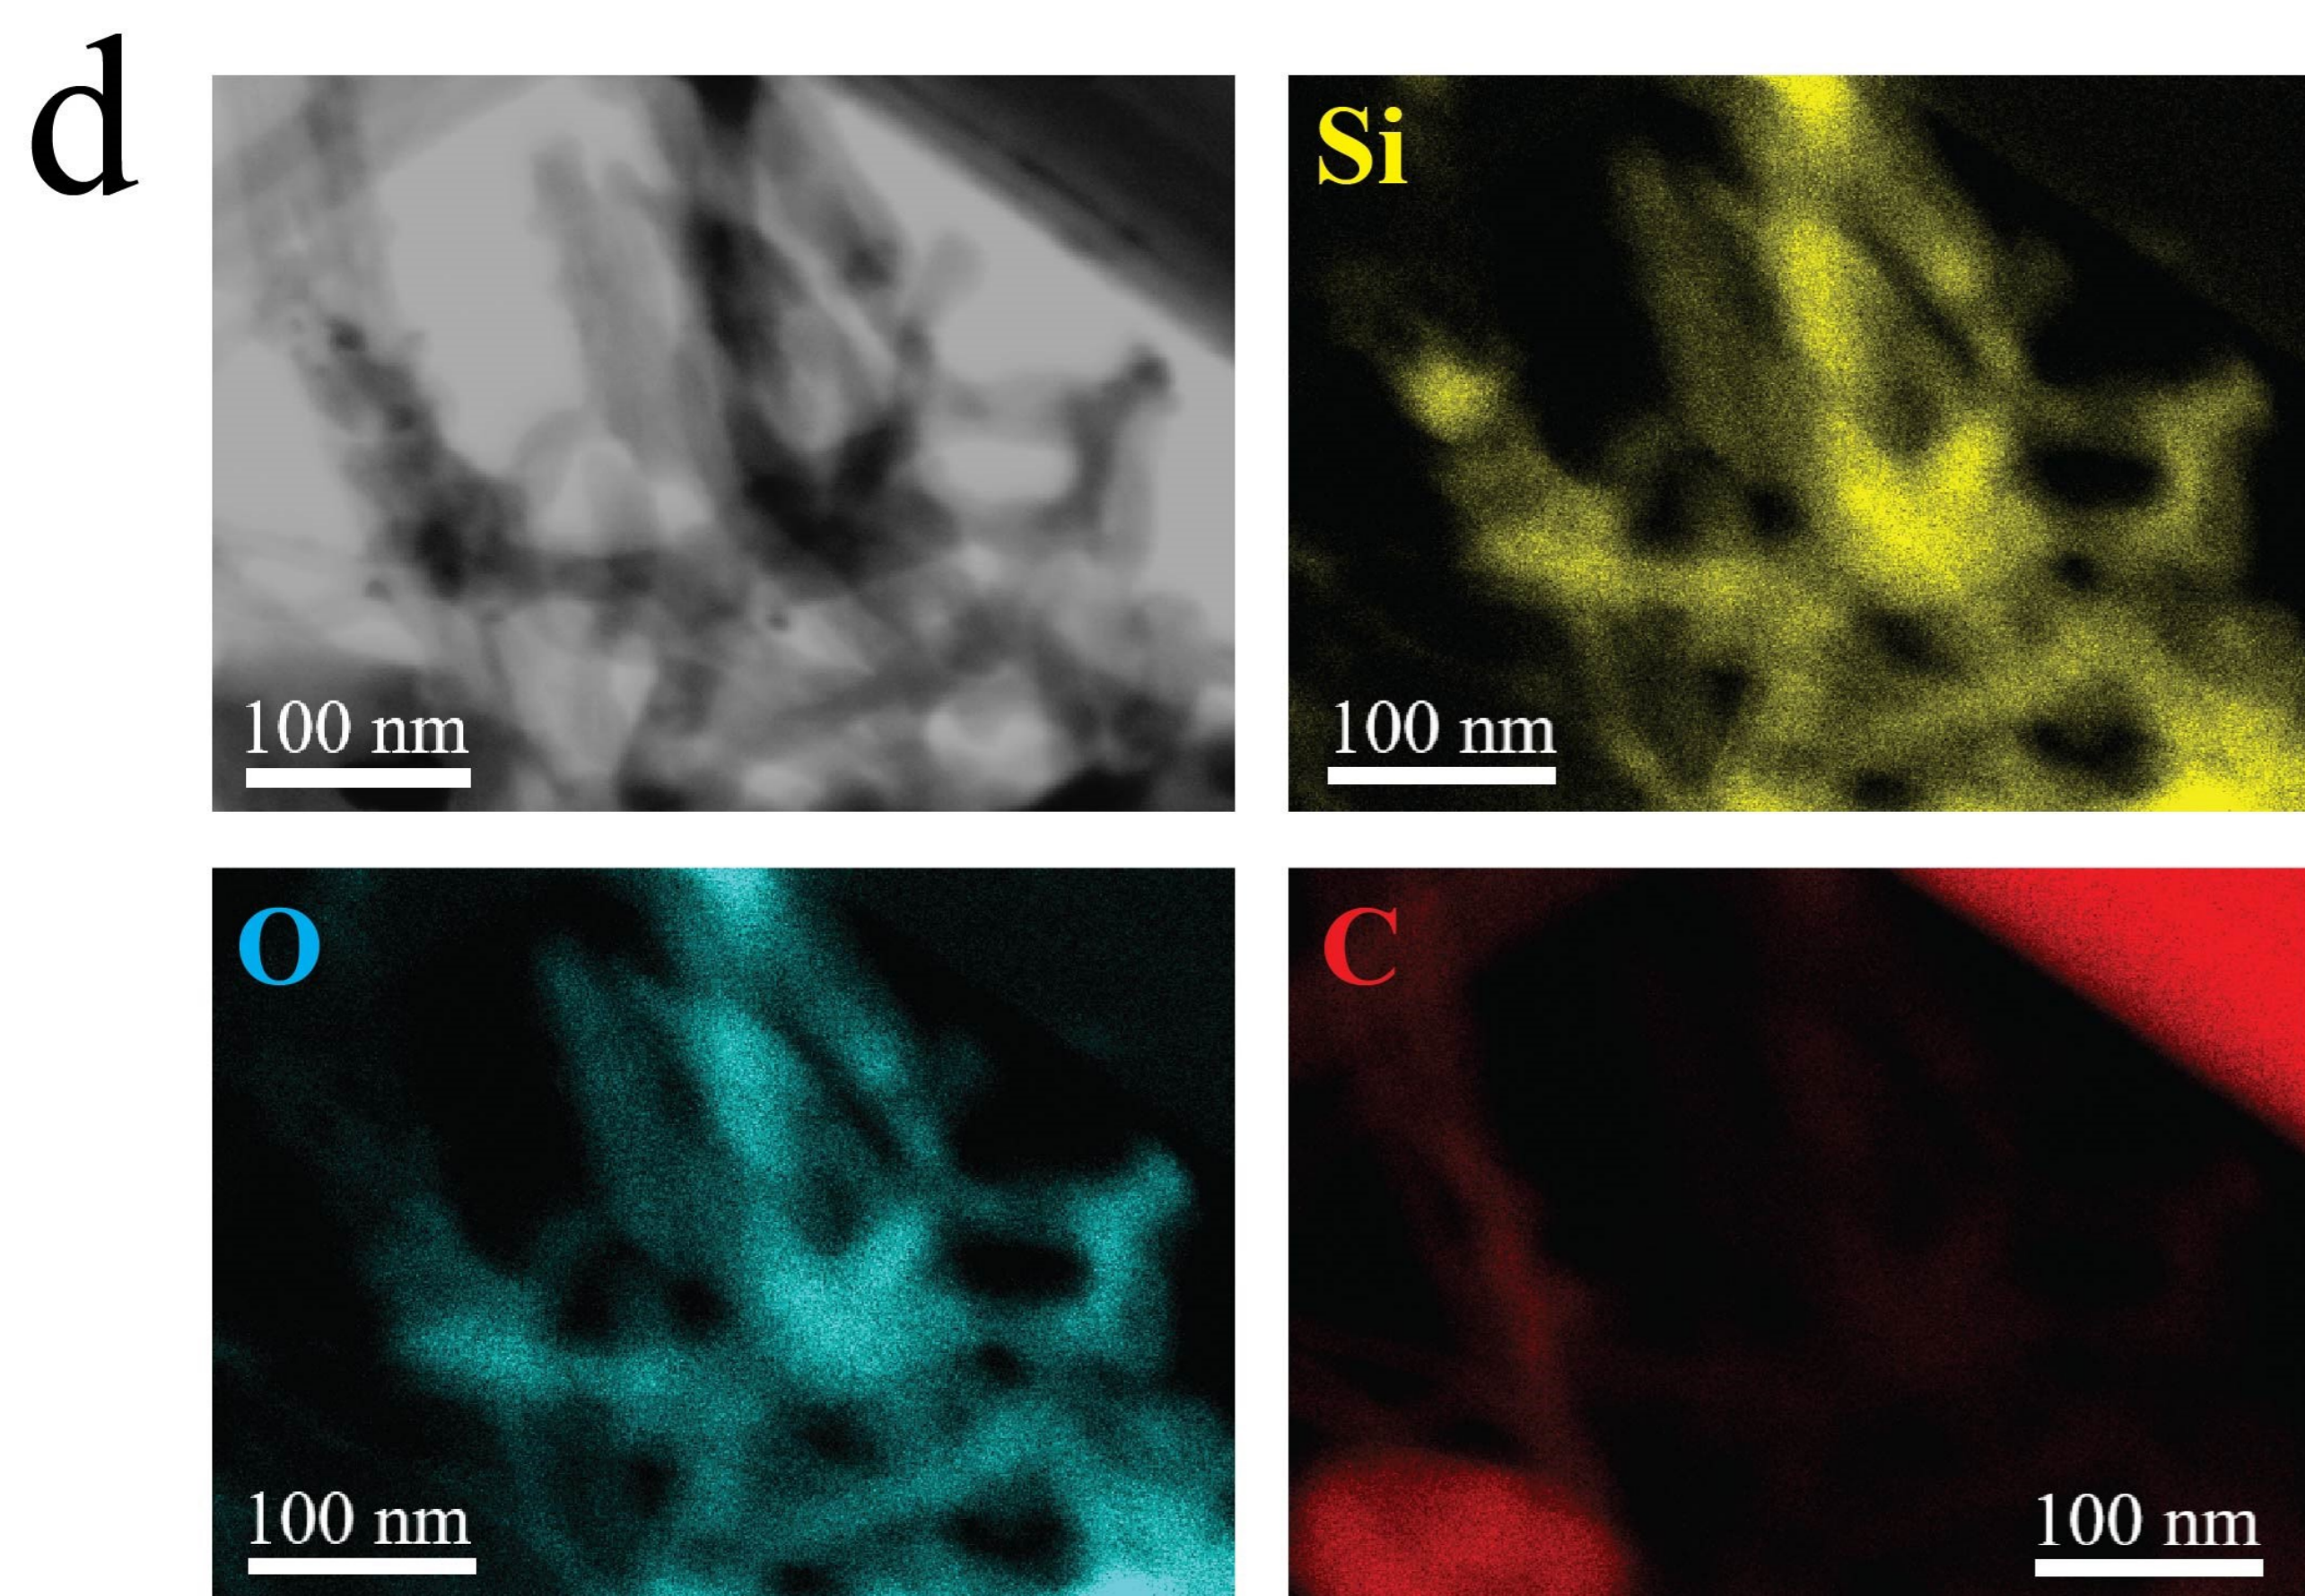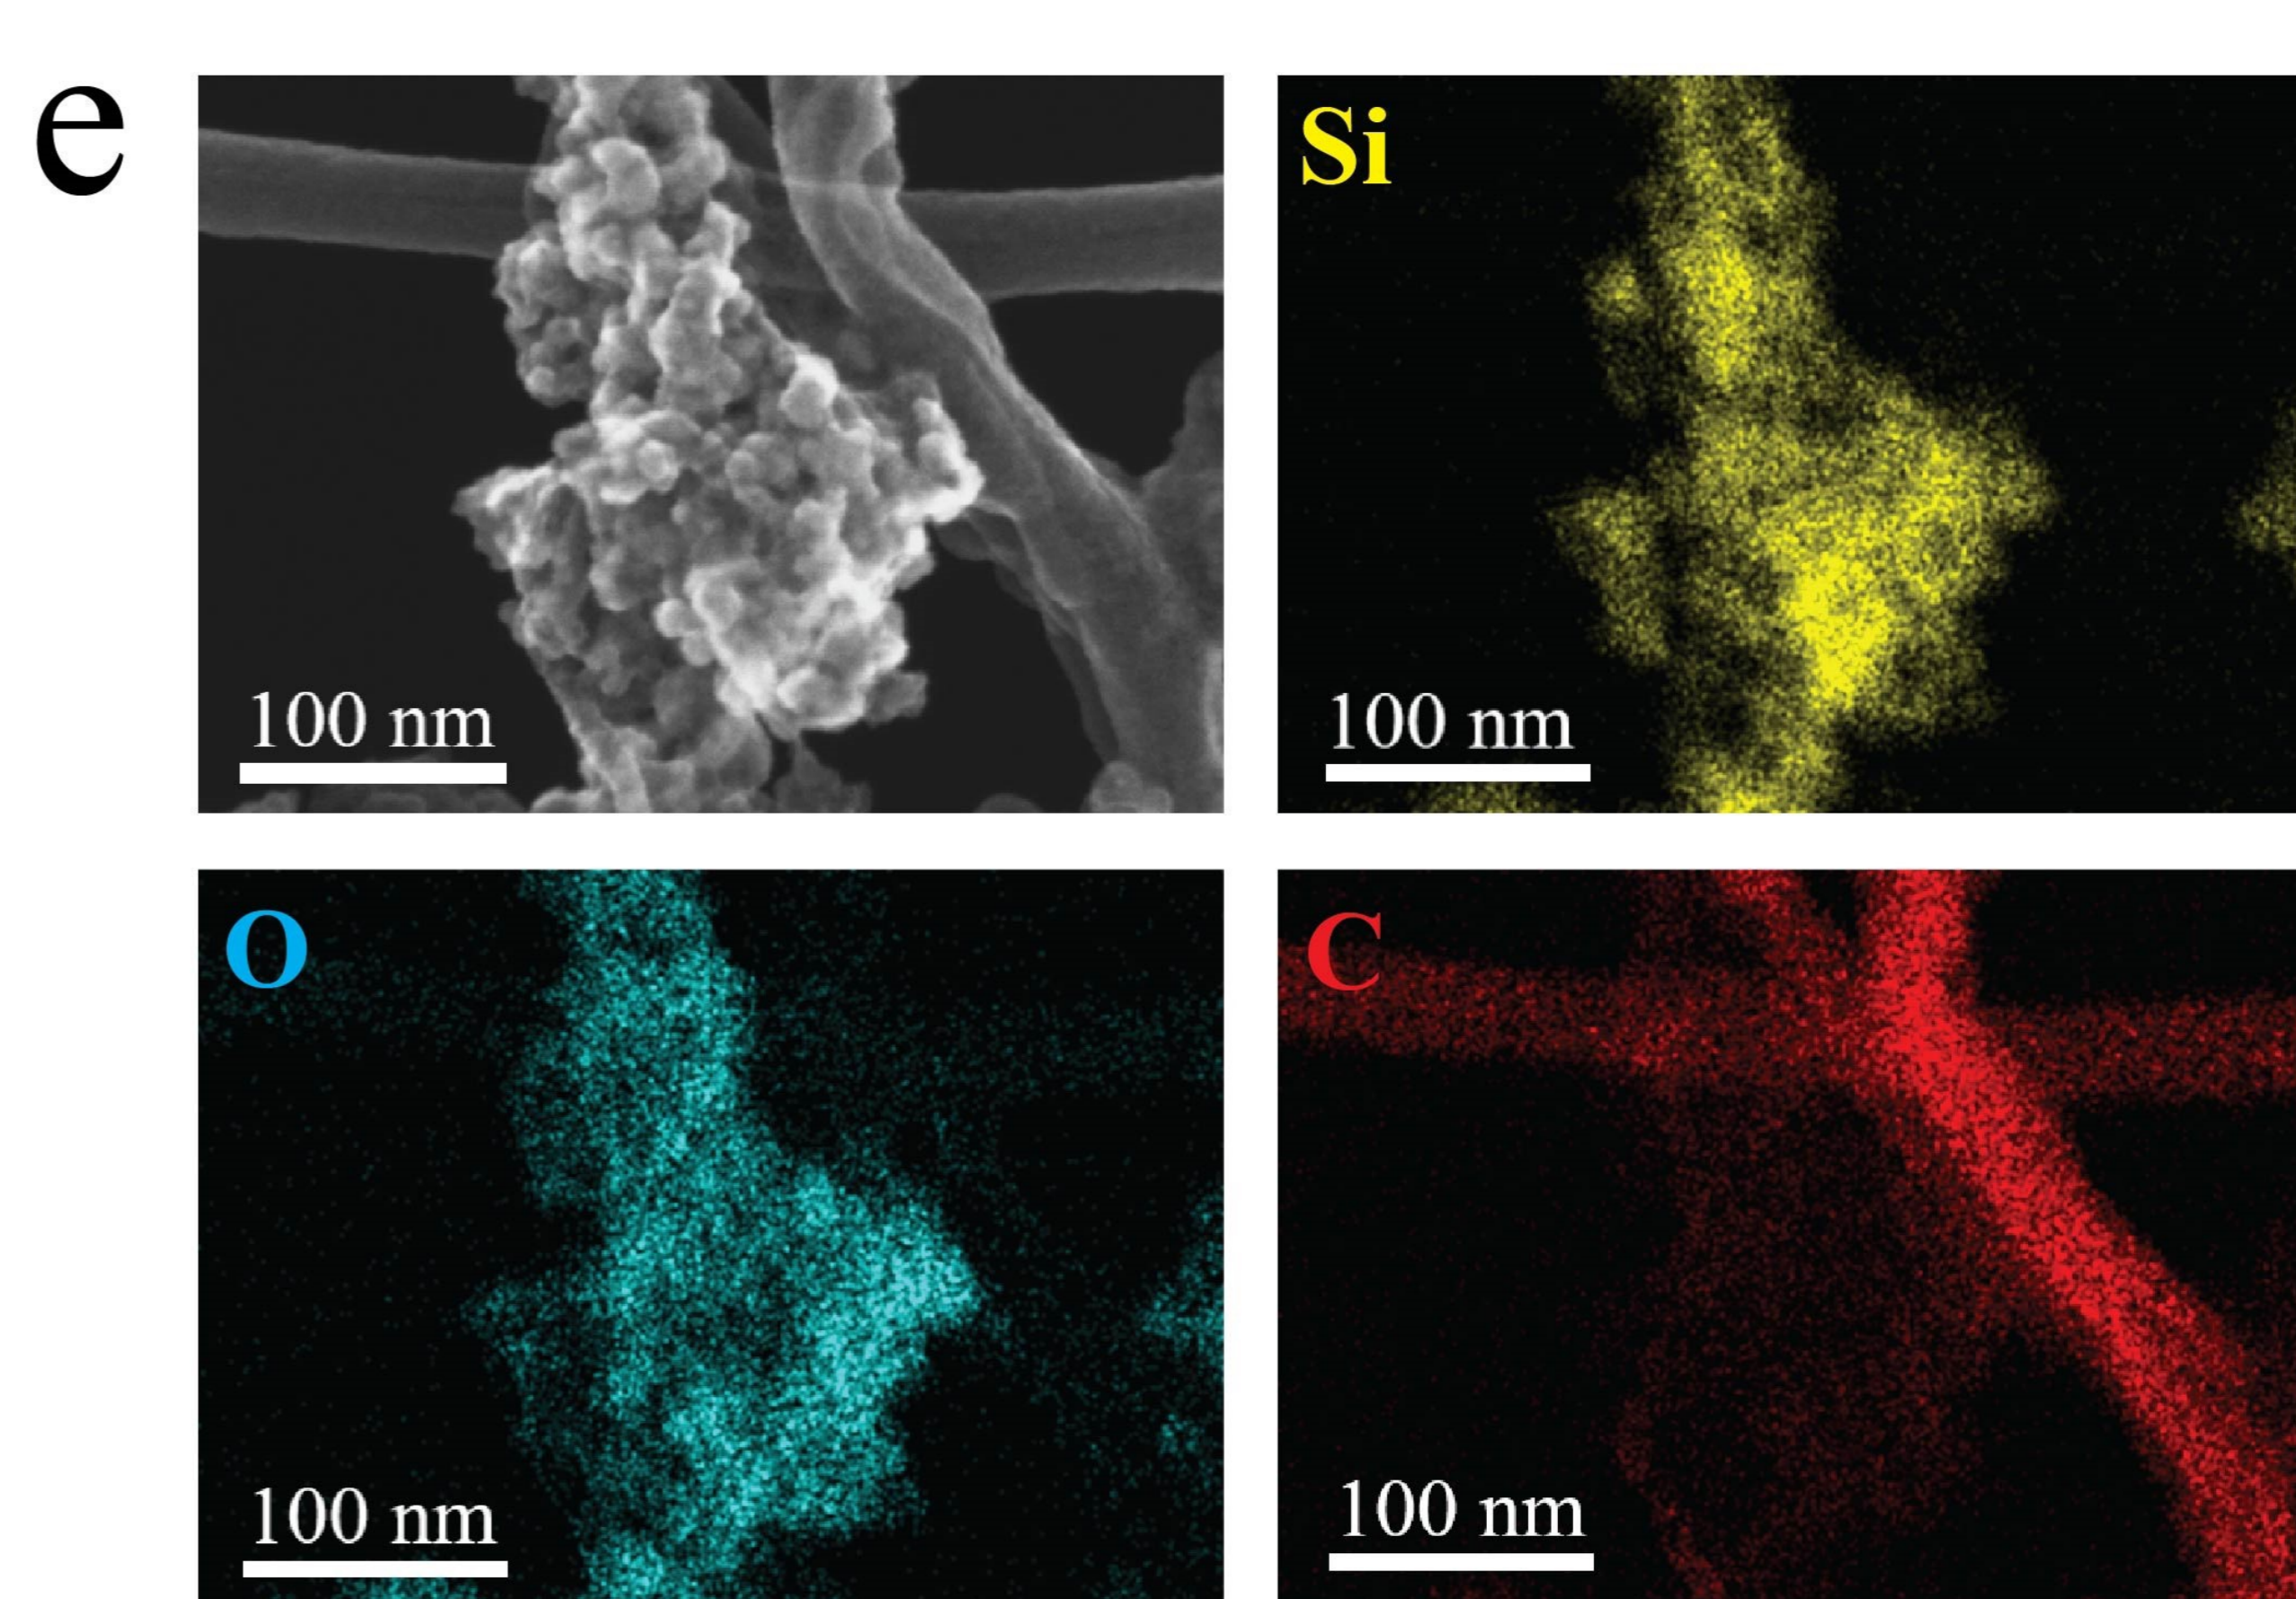

Supplement: d4gc00498a7.pdf [file d4gc00498a7.pdf]

## 17% c-Si / MCMB

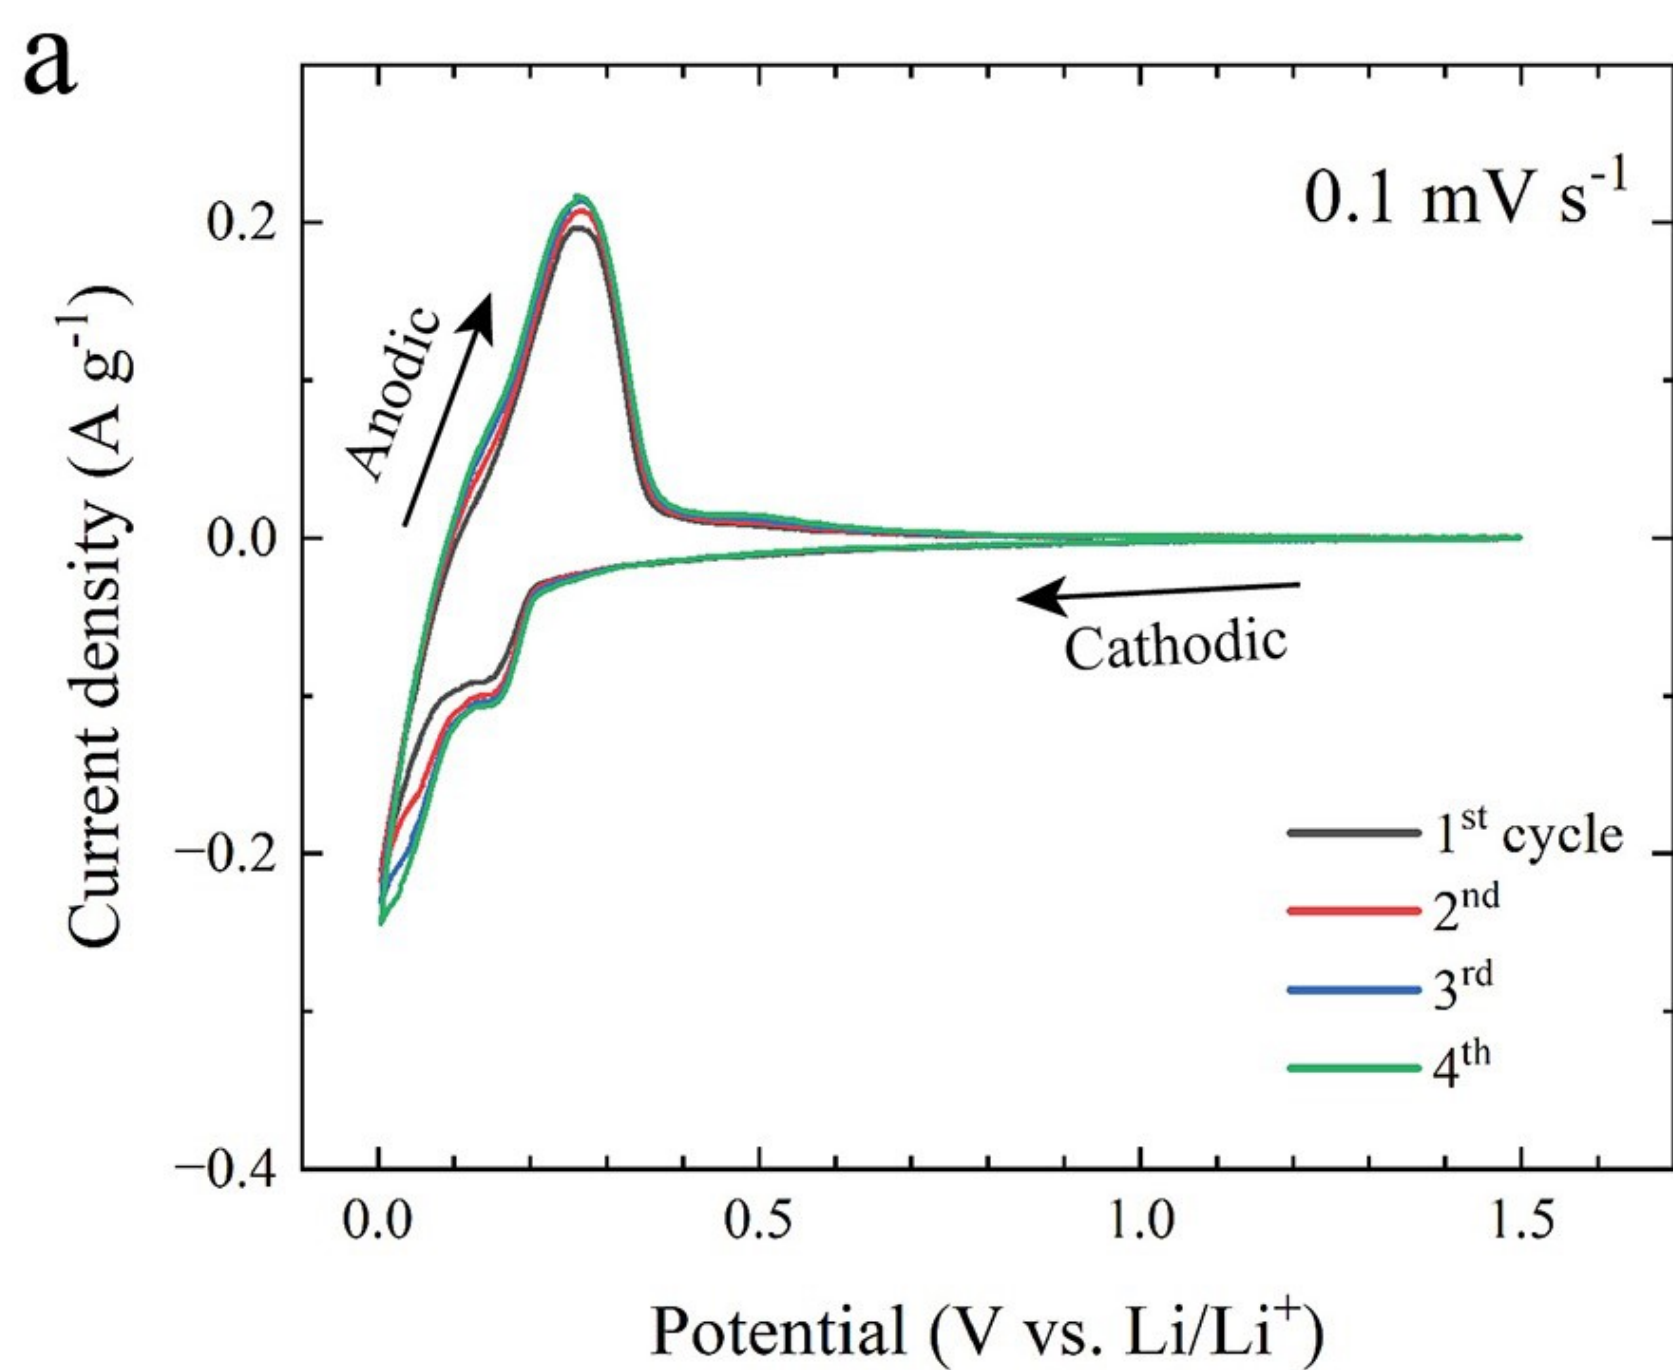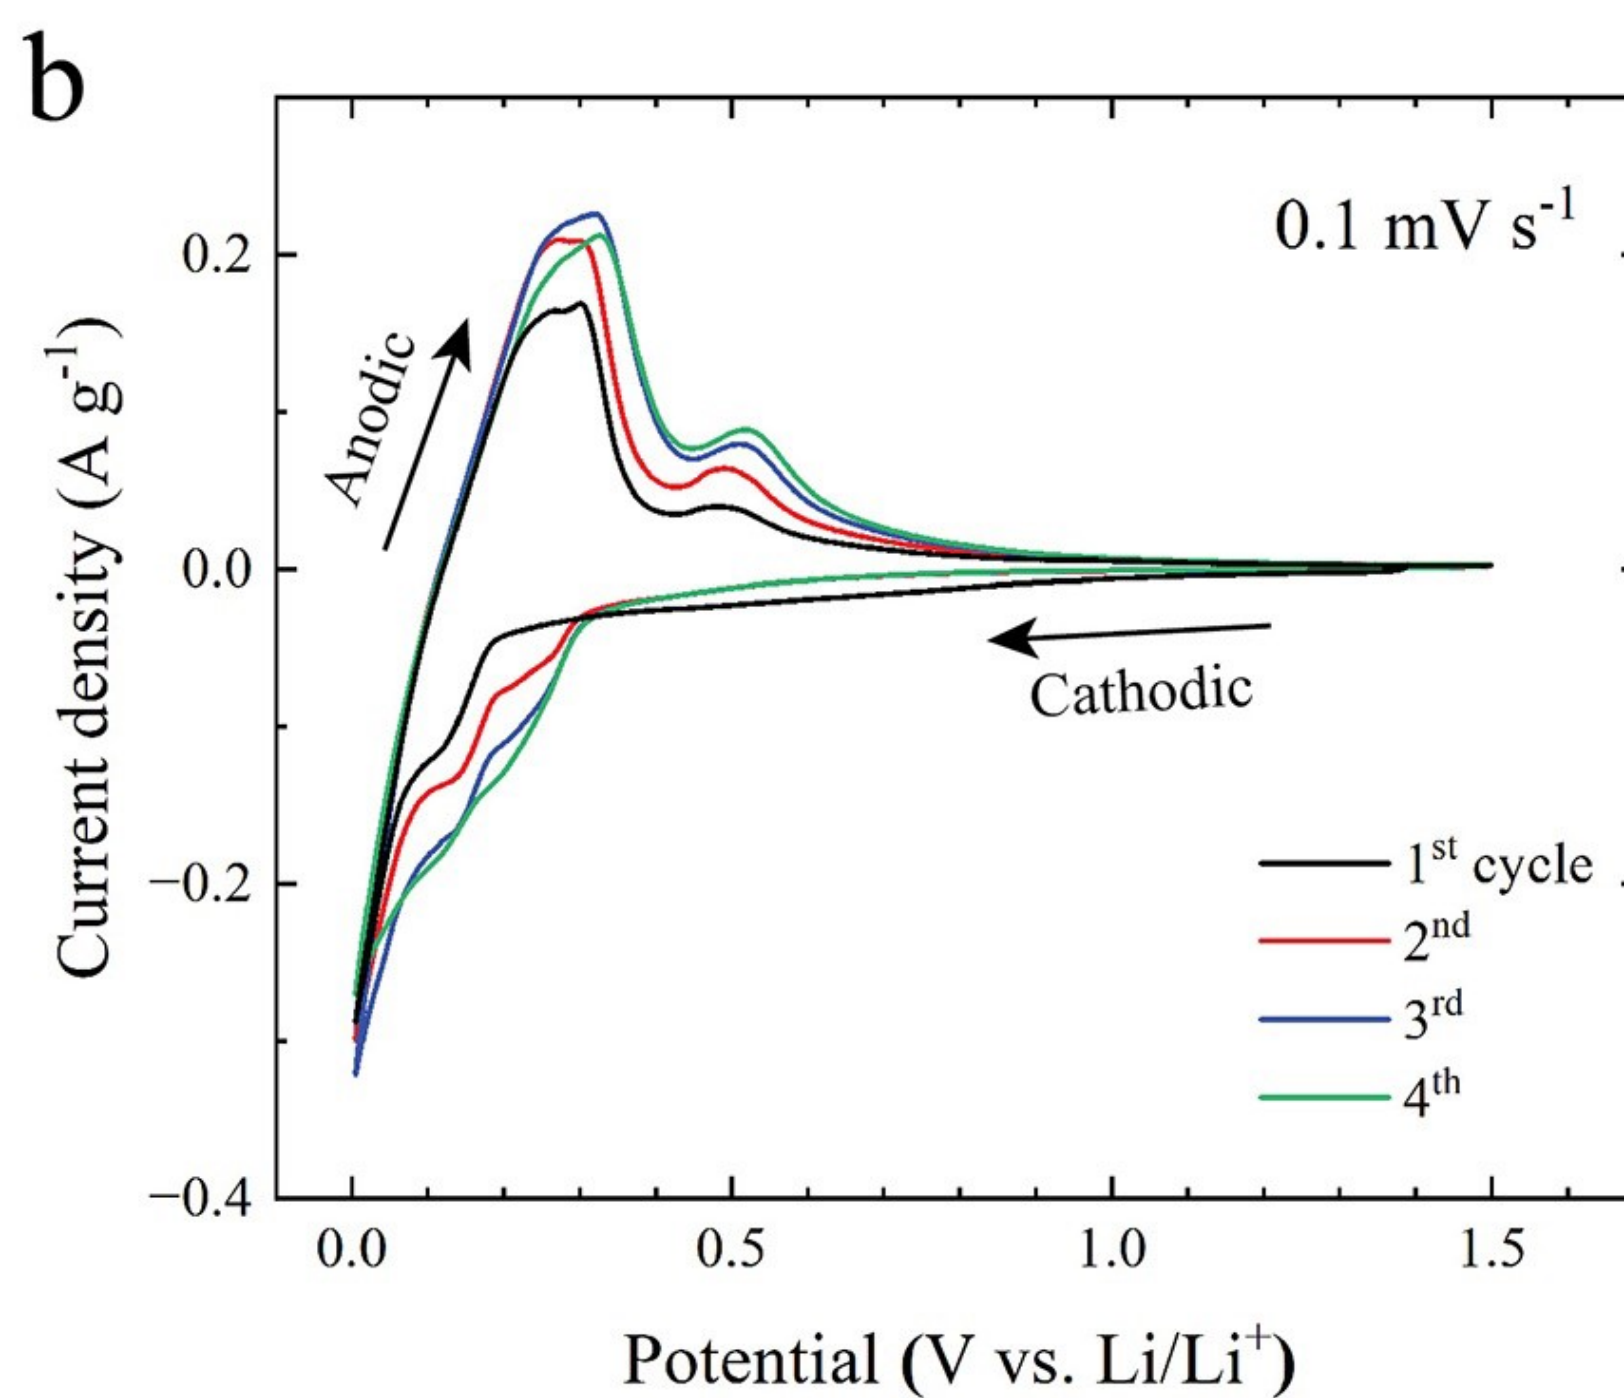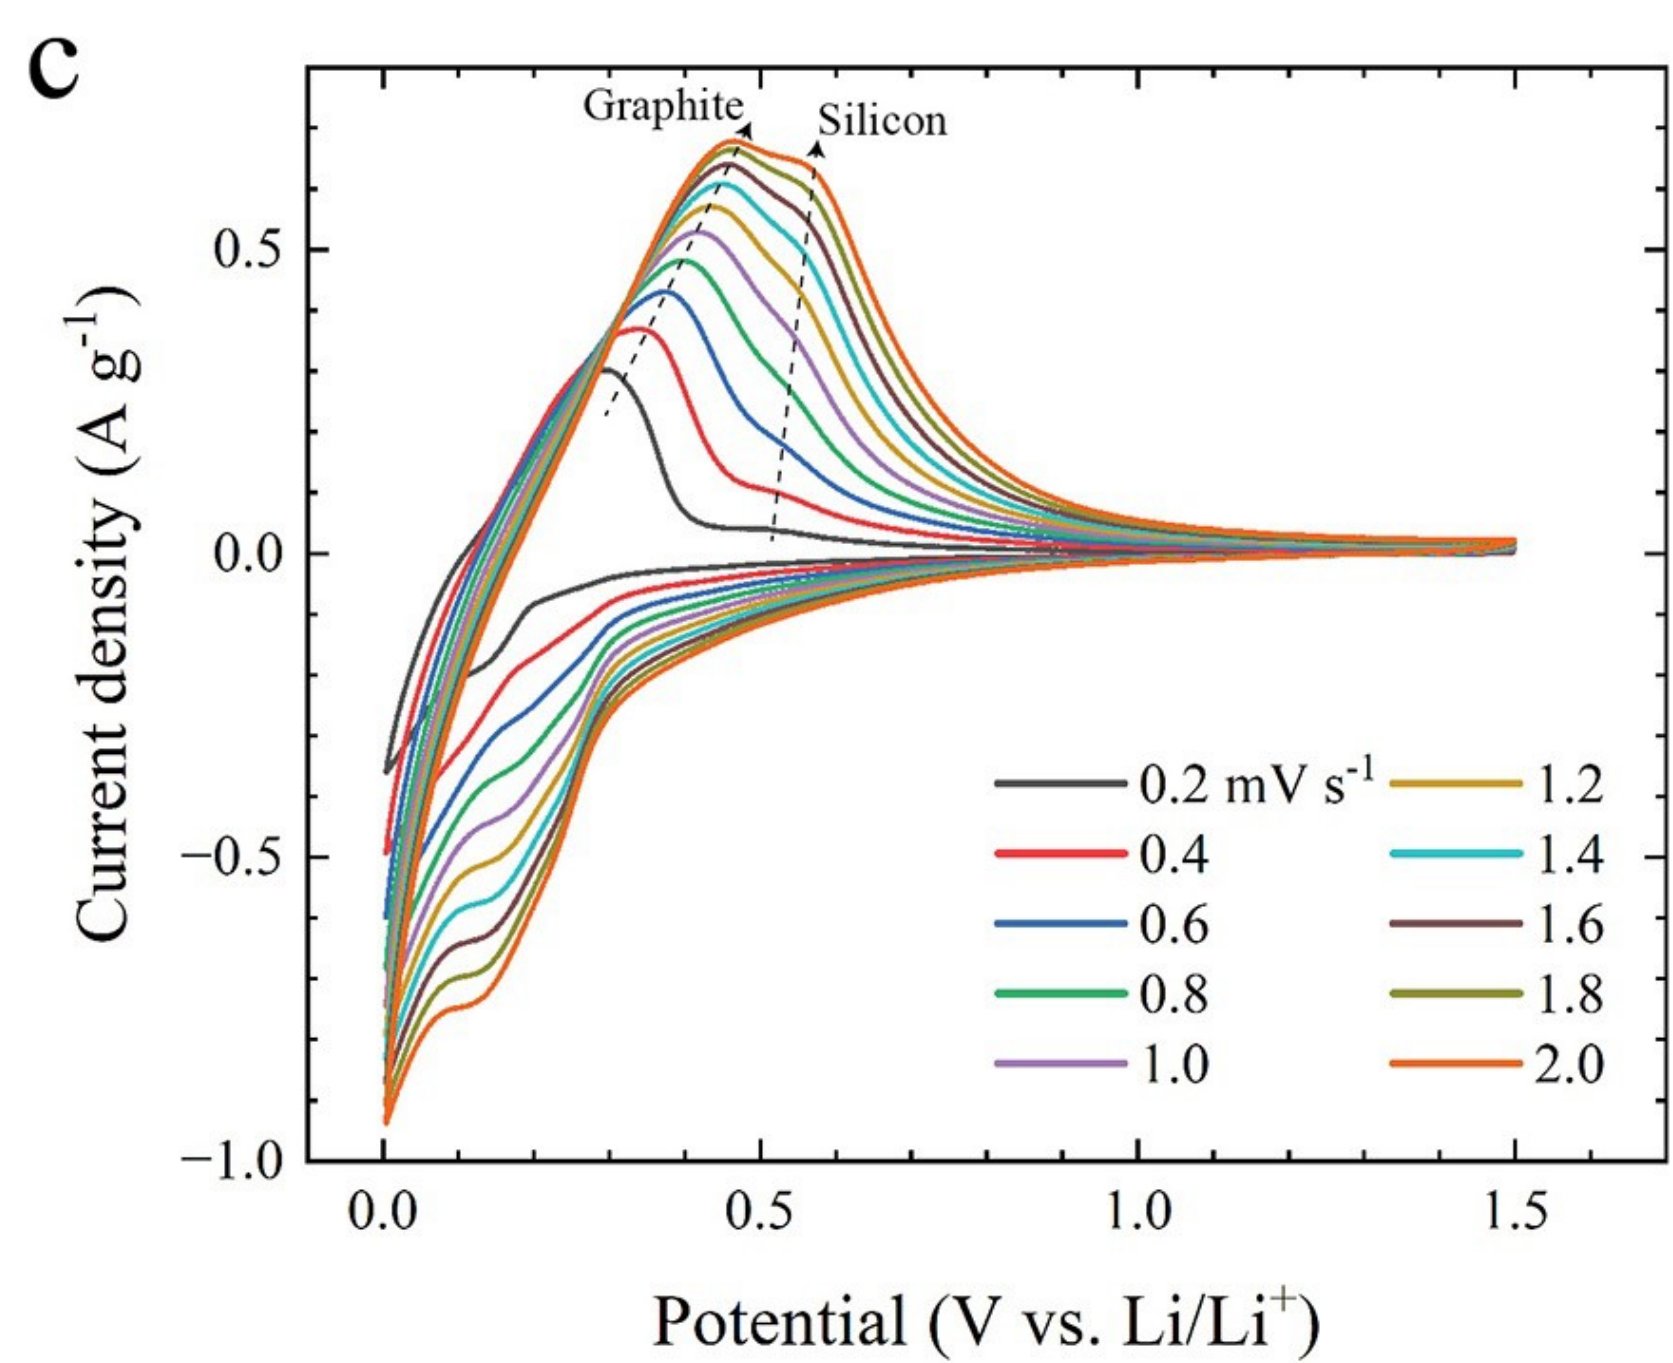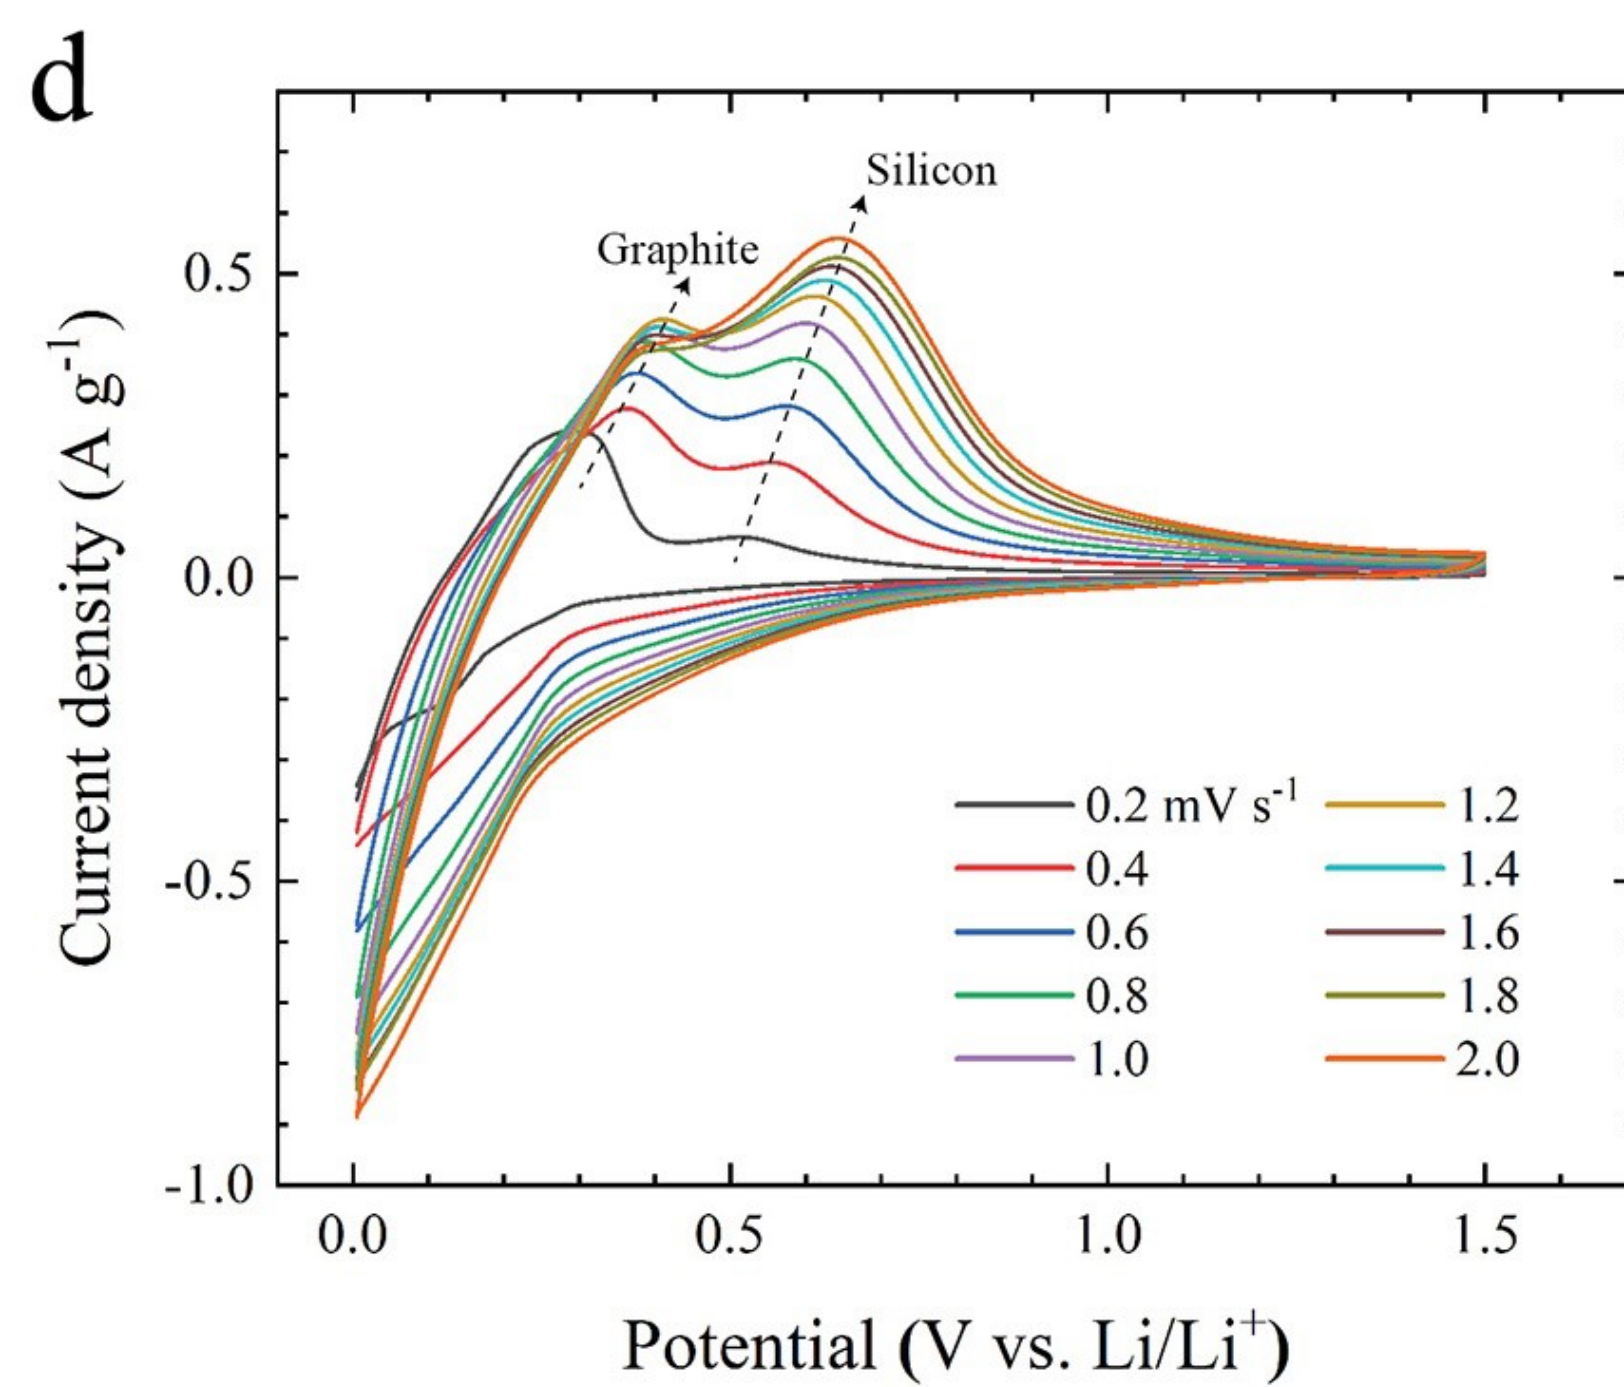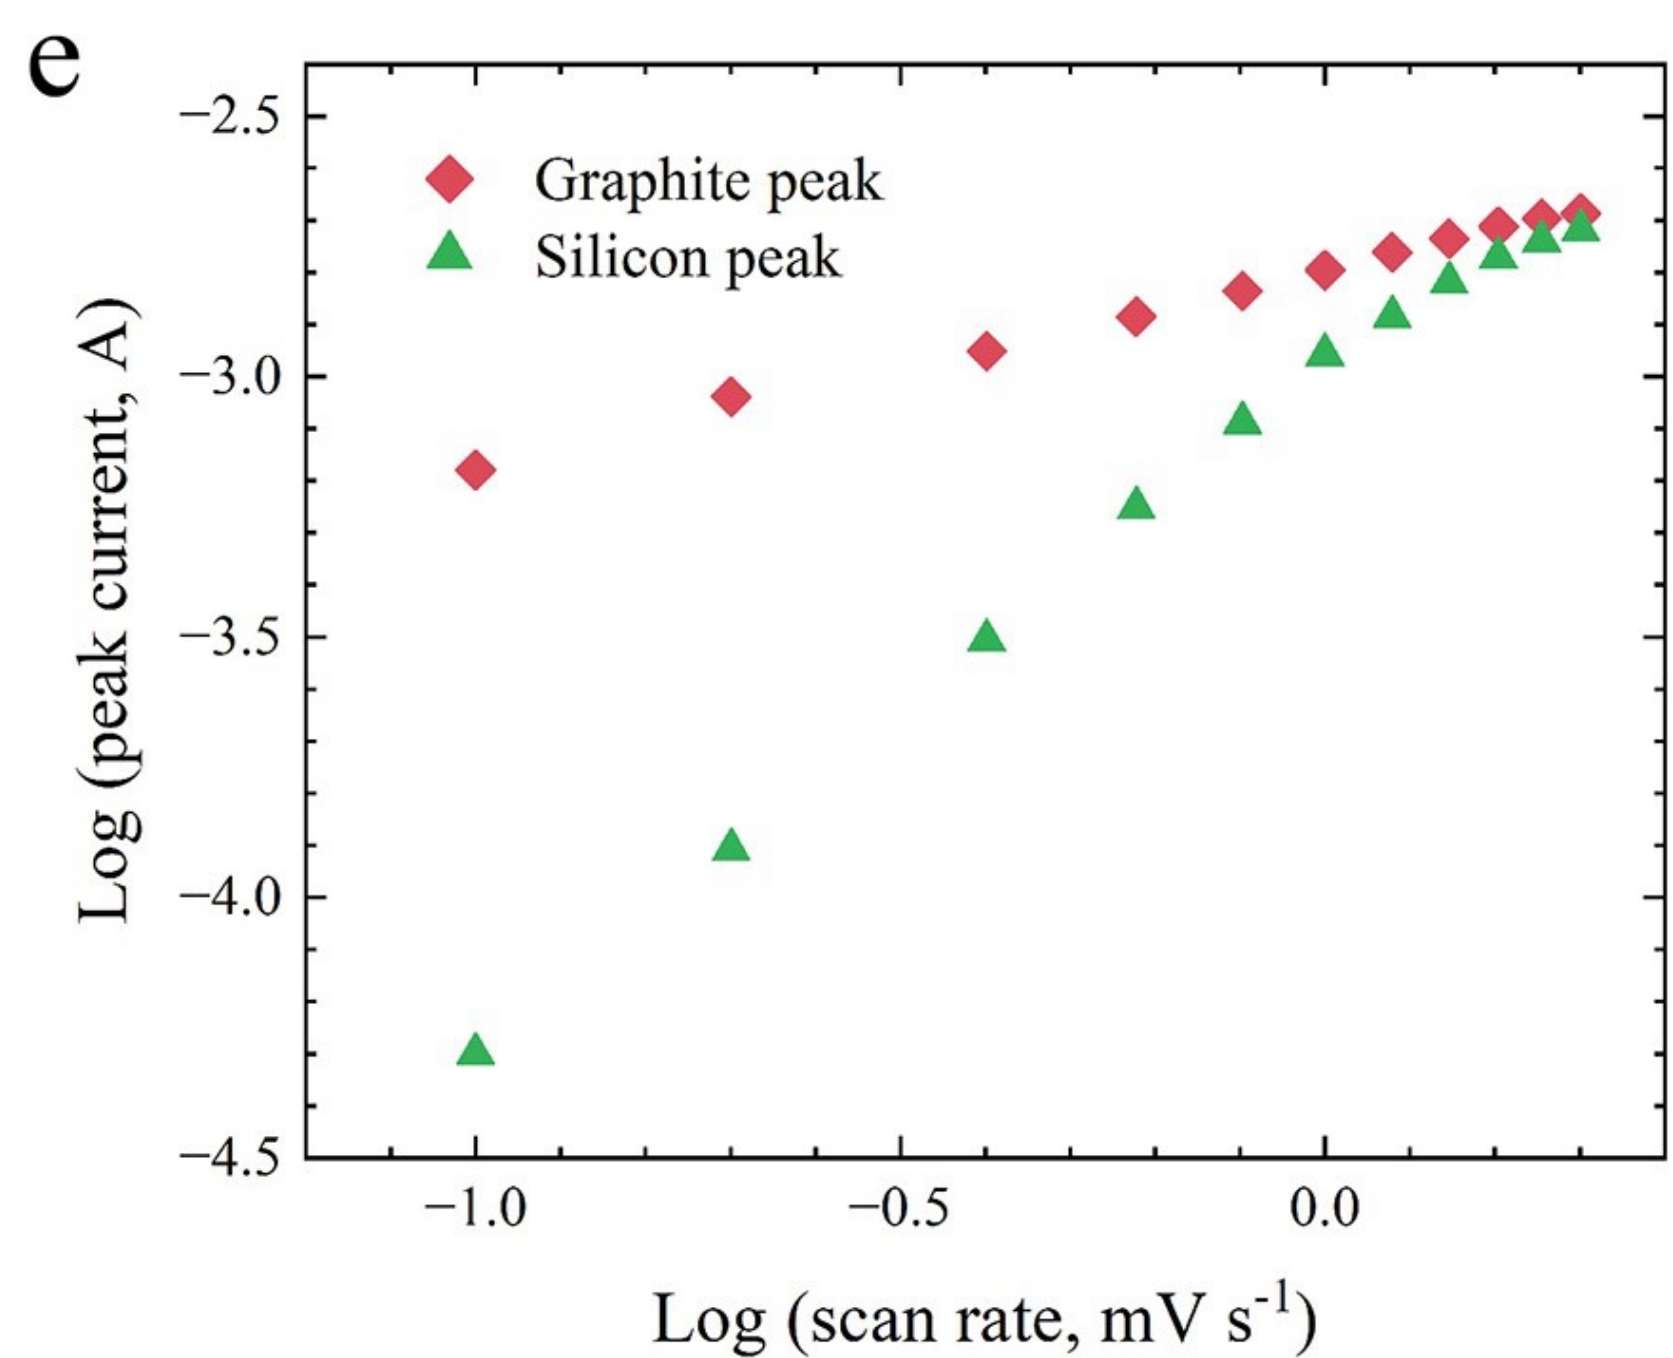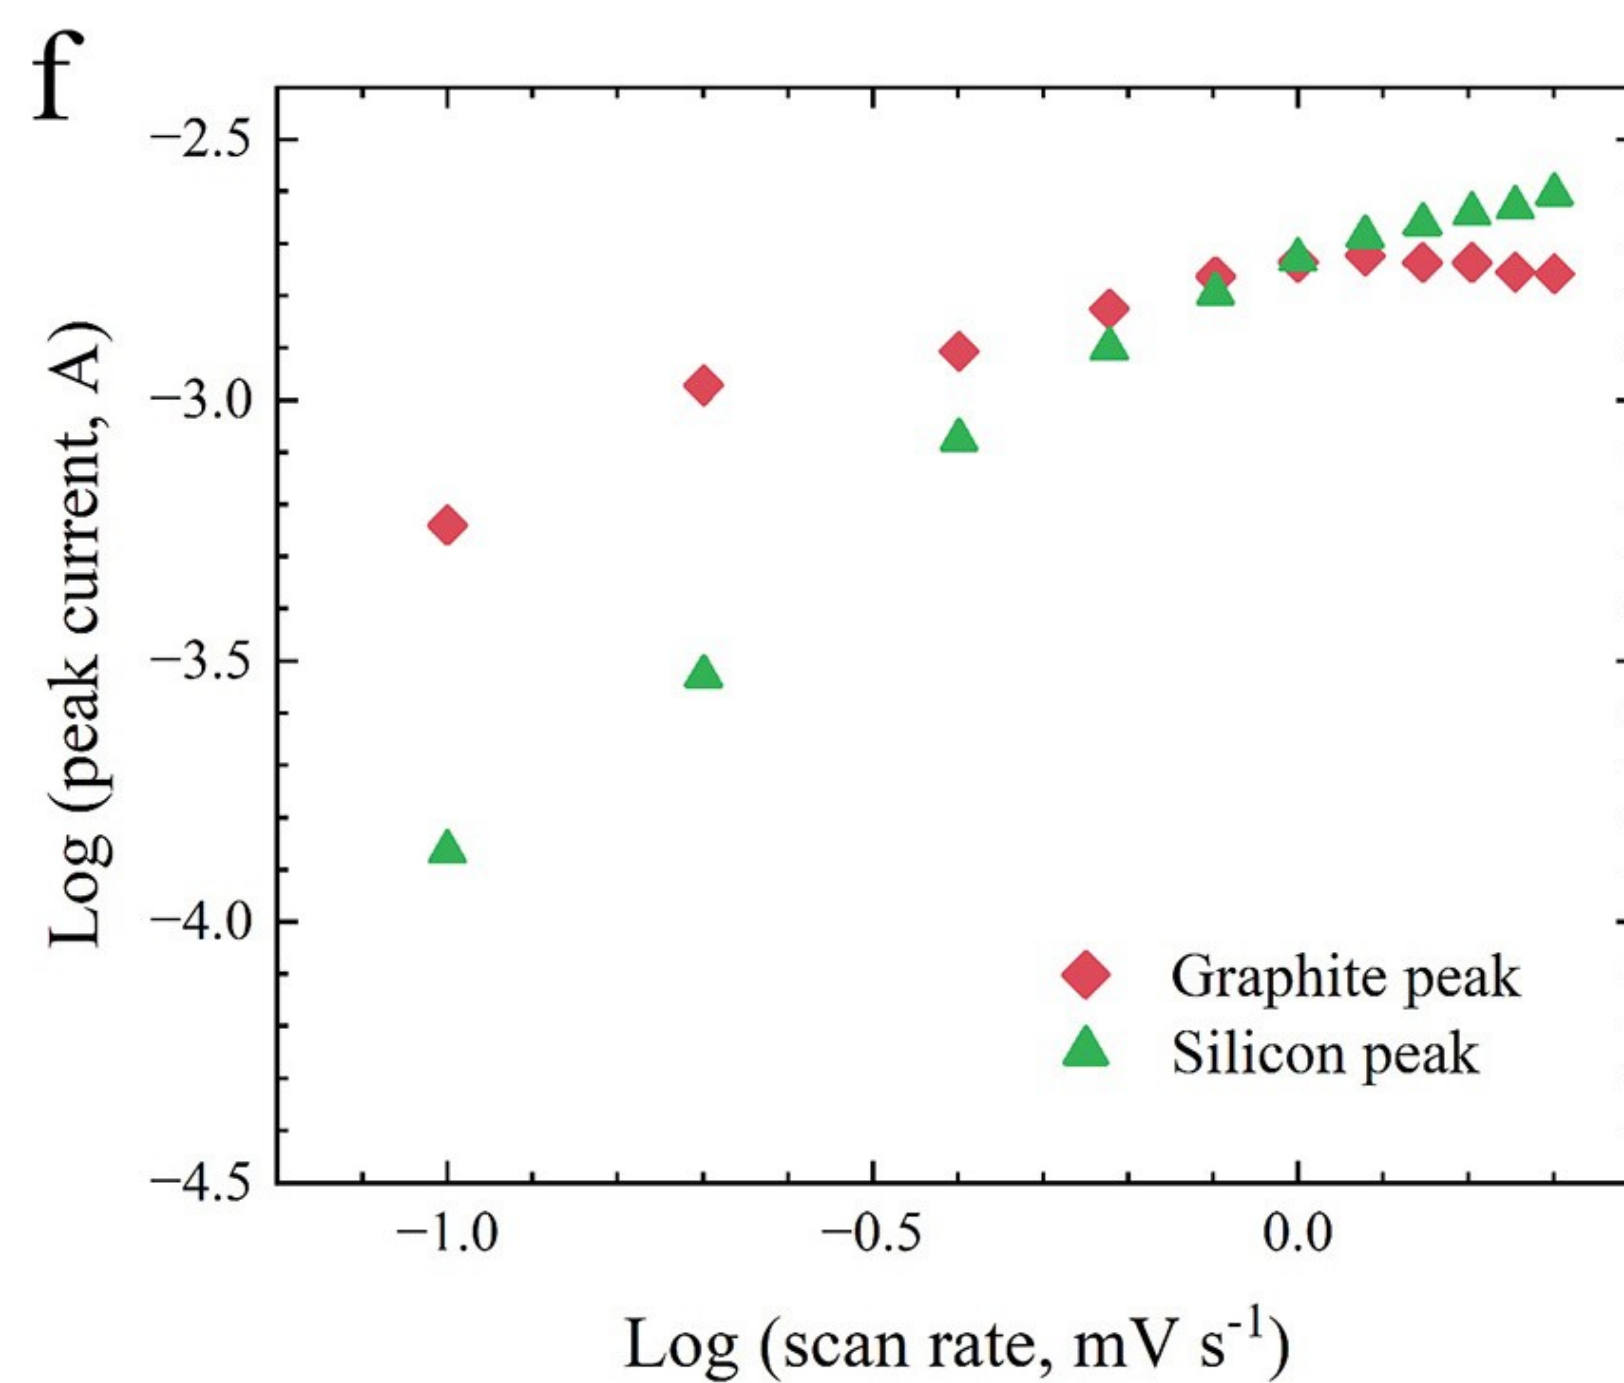

Supplement: d4gc00498a8.pdf [file d4gc00498a8.pdf]

**a**

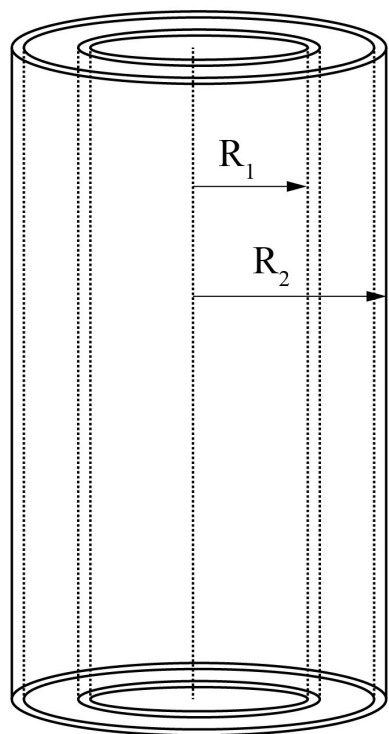

**b**

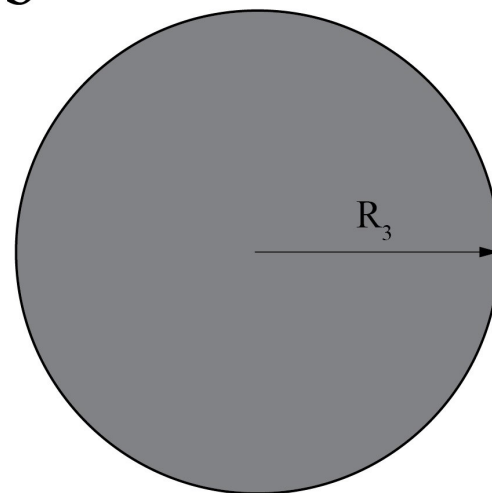

**c**

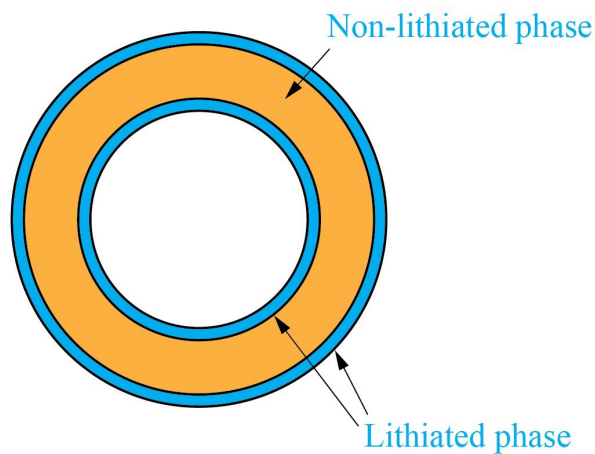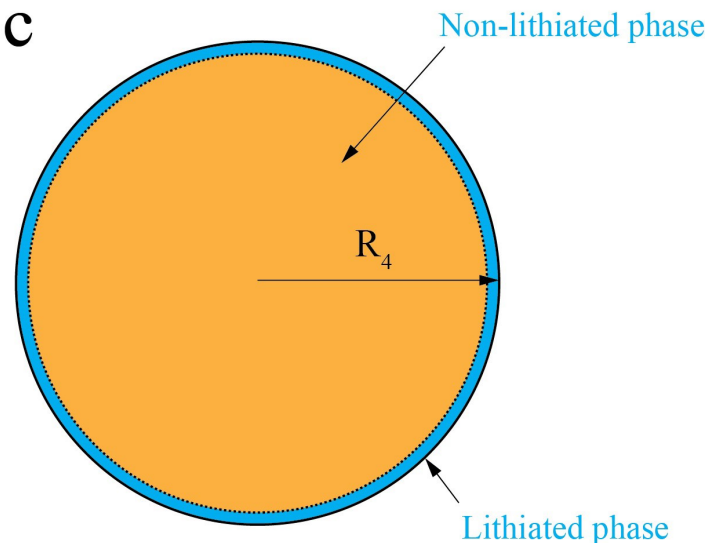

Supplement: d4gc00498a9.pdf [file d4gc00498a9.pdf]
